# Supplementary material for: Djhsp60 Is Required for Planarian Regeneration and Homeostasis
Source: Biomolecules. 2022 Jun 9;12(6):808. doi: 10.3390/biom12060808 (PMC9221281; doi:10.3390/biom12060808)
Supplement: Supplementary file 1 [file biomolecules-12-00808-s001.zip]

Archive with 9 entries (9 files):
- Supplementary figures and figure legends version2.pdf
- Supplementary File 1 Primers used in this work-revision.xlsx
- Supplementary File 2  SmedHsp60 expression cell types.xlsx
- Supplementary File 3 Transcripts related to mitochondrial function and protein synthesis.xlsx
- Supplementary File 4 Neoblasts-related transcripts.xlsx
- Supplementary File 5 Transcripts related to energy metabolism.xlsx
- Supplementary File 6 Down-regulation of intestine-enriched transcripts.xlsx
- Supplementary File 7  Up-regulated transcripts.xlsx
- Supplementary movie1 Live image of head-defective animal.mp4
