# Supplementary material for: Djhsp60 Is Required for Planarian Regeneration and Homeostasis
Source: Biomolecules. 2022 Jun 9;12(6):808. doi: 10.3390/biom12060808 (PMC9221281; doi:10.3390/biom12060808)
Supplement: Supplementary file 1 [file biomolecules-12-00808-s001.zip › Supplementary File 1 Primers used in this work-revision.xlsx]

## Sheet: Sheet1
Primers	Usage	Sequence	Size (bp)	Targeted gene	Genbank accession number
DjHsp60F1	WISH	5'- CAAACGAAGAAGCTGGTGATGGTAC-3'	1290	Heat shock protein 60	MH509193
DjHsp60R1	WISH	5'- CTCCTGACGCATCAACTAAAGC-3'
DjwiAF	WISH	5'- GAAGAACAGCCCATTACTATCCGTG-3'	1222	PiwiA	Homolog to AB530671.1
DjwiAR	WISH	5'- GAGTCGCTCCACGATGAACCTTGCC-3'
Djmcm2F	WISH	5'- TTCAAGAGAGTCCAGGCACTGTTCC-3'	1441	Minichromosome maintenance 2	Homolog to Y19170.1
Djmcm2R	WISH	5'- GATTTCCCTTCAGCTCGCAACGTGG-3'
DjH2BF	WISH	5'- CACACAAGCGAAAAGAAAGTTACGG-3'	442	Histone 2B	Homolog to AB576209
DjH2BR	WISH	5'- ACAAATTTCTTGATTTACAGTCTCG-3'
DjNb21.11eF	WISH	5'-AGAGATTTGATTTCGTGAGAAGAGG-3'	640	The homolog of Smed-Nb21.11e	Homolog to JX122762.1
DjNb21.11eR	WISH	5'-ACTGGTCCAATGCATCGTATTCTGG-3'
DjAgatF	WISH	5'-GAACACCAGAAATGGCTTGTTGTCC-3'	996	Arginine-glycine amidinotransferase	Homolog to KY348647
DjAgatR	WISH	5'-ATGTCCAACAATGAATACCACCTCC-3'
CelaF	WISH	5'-ATGTTTGGTGATCATTTATGTGGTG-3'	641	Chymotrypsin-like elastase
CelaR	WISH	5'-GTGAATACTGTTGGAACATTTGAGG-3'
LipfF	WISH	5'-ATGTTTGGTTAGGAAATTGTCGGGG-3'	837	Gastric triacylglycerol lipase
LipfR	WISH	5'-TGTCTTGATAGATCACTTCACGAGC-3'
SodF	WISH	5'-TTGATAATGACTGTTCATGCCGTGTGCG-3'	467	Superoxide dismutase
SodR	WISH	5'-TTAGTAATTCCTACAACTCCGCAAGC-3'
GstF	WISH	5'-TTAGCTCAATCAATTAGACTTCTATTGG-3'	633	Glutathione S-transferase
GstR	WISH	5'-CACTATAAAATTTAGTTACAATCGCCACC-3'
GpxF	WISH	5'-GCTACATCTATATATGATTTCTCAGC-3'	485	Glutathione peroxidase
GpxR	WISH	5'-TTCTCTAATTCTGATTCAATATCGG -3'
CatLF	WISH	5′-TTCCTAATTCGTGGGATTGGAGAGA-3′	650	Cathepsin L	MH136811
CatLR	WISH	5′-TCTTATCAATGGAACACTTGCCATC-3′
Hsp60F2	dsRNA	5'- CAAACGAAGAAGCTGGTGATGGTAC-3'	1290	Heat shock protein 60	MH509193
Hsp60R2	dsRNA	5'- CTCCTGACGCATCAACTAAAGC-3'
β-cateninF	dsRNA	5'-ACAACCATCGAATCTTATCCGCCAG-3'	1325	β-catenin-1	MG599480
β-cateninR	dsRNA	5'- CATTGTGTAACCGAATTATGTCTGT-3'
GFPF	dsRNA	5'- CGTGCAGTGCTTCAGCCGCTACCCC-3'	507	Green fluorescent protein
GFPR	dsRNA	5'- AGCTCGTCCATGCCGTGAGTGATCC-3'
qHsp60F	qPCR	5'- CACCATGTTACACCATTGCCC-3'	277
qHsp60R	qPCR	5'- CCACCCATACCTCCCATTCCAC-3'
qDjwiAF	qPCR	5'- GGTTATTCCACAACTATTACAAGAG-3'	226
qDjwiAR	qPCR	5'- AATCTACTTCGTCATTGATATCC-3'
qDjmcm2F	qPCR	5'- GAGGAGGAGAAGAAGGATGT-3'	161
qDjmcm2R	qPCR	5'- GCTGTGCTCAAACTGGGACT-3'
qDjH2BF	qPCR	5'- TCCGTCCGTCTGATTTTGC-3'	125
qDjH2BR	qPCR	5'- AAGAGGACCGTTGTTCGTTCTC-3'
qCyclinDF	qPCR	5'-TGAAGACCAGTAATCAAGATCC-3′	298
qCyclinDR	qPCR	5'-GACATATCATTAGCAGTAACCG-3′
qE2FF	qPCR	5'- GCAGCACTTATTGGTCATCAGA-3'	287
qE2FR	qPCR	5'- GTCCATCACTTCAATCTCGTCTT-3'
qCyclinBF	qPCR	5'-GAAGAGATGTTAGTCACGATGTTG-3′	227
qCyclinBR	qPCR	5'-CTTAGCGAGAGCGATAATCACT-3′
qCDK1F	qPCR	5'- GGTATTCGTGTGCCATTGATGT -3'	293
qCKD1R	qPCR	5'- ATTGATTCTCTGTGCTGGATGATAG-3'
qCytb5F	qPCR	5'-ATCGTGCTGGATTGTGATTCAT-3′	240	Cytochrome b5
qCytb5R	qPCR	5'-CCATCTTCAGGAGAGACAGTTG-3′
qCox4F	qPCR	5'- GTCCTCAATAATATCACCTCAACAG-3'	251	Cytochrome c oxidase subunit 4
qCox4R	qPCR	5'- CAGCTAATGTCTGACGATAACTC-3'
qIDHF	qPCR	5'-TTCGTGAGCCAATCATCTGTAAG-3′	192	Isocitrate dehydrogenase
qIDHR	qPCR	5'-CAGTCATCCTATCAGCCTTGTG-3′
qCSF	qPCR	5'-TCAGGAAGTATTGTTGTGGGTTC-3′	209	Citrate synthase
qCSR	qPCR	5'-TGAATAATGGATAATCAGGCAAGTG-3′
qASTF	qPCR	5'-GGAACAGGCTCTTTAGCATTAGG-3′	297	Aspartate aminotransferase
qASTR	qPCR	5'-AACAACATCAGAAATAGCCAACC-3′
HKF	qPCR	5'-TACCAACTGGCAAAGAGGAGGGC-3′	269	Hexokinase
HKR	qPCR	5'-ACTGATTTGTGAGCACGGAAAGG-3′
qPKF	qPCR	5'- ATTGCTGCTGGAATGAATGTTG-3′	182	Pyruvate kinase
qPKR	qPCR	5'- CCACTGCCATTAACGAGACC -3′
PFKF	qPCR	5'- CACAGATATGACAATAGGAACAGAC-3′	286	ATP-dependent 6-phosphofructokinase
PFKR	qPCR	5'- CGCTCCTTCCGATACTAATATGATA-3′
G6PDF	qPCR	5'- GACGAACATTCCAAACTTGATGAG-3′	201	Glucose-6-phosphate 1-dehydrogenase
G6PDR	qPCR	5'- CCAGCACTCTTGACGAATCATGC-3′
RPIF	qPCR	5'- TCATGCACACCTACTTCATATCAAG-3′	162	Ribose-5-phosphate isomerase
RPIR	qPCR	5'- CAGATGACAACCTCCACCTCC-3′
TKTF	qPCR	5'- GGCAACTAACGCATCTAATTCTG-3′	163	Transketolase
TKTR	qPCR	5'- AAGTATTGGAGCAGCATGACC-3′
Glut1F	qPCR	5'- GTTCGGTTATCAGACTGGTGTAG-3′	187	Glucose transporter member 1
Glut1R	qPCR	5'- GGCTATAACTCCTCCAACAAGAG-3′
Glut2F	qPCR	5'- CCAGAATTAGAAGAGGCGATTAC-3′	248	Glucose transporter member 2
Glut2R	qPCR	5'- CCAGTTCCTACGATGACATATTG-3′
OGDHF	qPCR	5'- GCGATACTGTGTCTGTTGATGA-3′	268	2-oxoglutarate dehydrogenase
OGDHR	qPCR	5'- TGTAATGCTGGACTGCCTGTA-3′
ACADF	qPCR	5'-AGCAGCAGAAGATGTATGTGGAG-3′	177	Acyl-CoA dehydrogenase
ACADR	qPCR	5'-CCAATAGCAATAGACCTGGAAGC-3′
qNDUFB5F	qPCR	5'- TAATGCCTCCTGCTAGGTATTCT-3′	299	NADH dehydrogenase [ubiquinone] 1 beta subcomplex subunit 5
qNDUFB5R	qPCR	5′- AACAGCTAAGCATCGTTCGTAG-3′
qSDH1F	qPCR	5′- GCTGGTTGTCTTATTACTGAAGGT-3′	212	Succinate dehydrogenase (ubiquinone) flavoprotein subunit
qSDH1R	qPCR	5′- GGTGGTAGATGACTTAATTGAAGGT-3′
qATPeF	qPCR	5′- TCGGATCGCTATTATTGGTGATAAG-3′	223	ATP synthase subunit gamma
qATPeR	qPCR	5′- AGGTTGTTCTGTGGTTGTATATGAC-3′
qDjmotF	qPCR	5′- AGGAGGAGTTCTTGCTGGAGATGTA-3′	266	Mortalin
qDjmotR	qPCR	5′- GAGGTGCTGGTGGAATGCCTATT-3′
qBcl2F	qPCR	5′- GCTGGCATATTGGAAAGGAGTTGA-3′	219	B-cell lymphoma 2
qBcl2R	qPCR	5′- TGTCCCGAGCAATCAGATAACCA-3′
qCelaF	qPCR	5'-CGAAATCAAAGTGGTTCTTGGTGAA-3′	274	Chymotrypsin-like elastase
qCelaR	qPCR	5'-TTTCCCATCTGACATCATGCTTCC-3′
qLipfF	qPCR	5'-GGTCCTGACTGAAGATGGCTACT-3′	206	Gastric triacylglycerol lipase
qLipfR	qPCR	5'-CCCGACAATTTCCTAACCAAACATC-3′
qDnpepF	qPCR	5'-GGCGTTGCGTTGTCAGAGAATTG-3′	238	Aspartyl aminopeptidase
qDnpepR	qPCR	5'-ACCGTTGGATGGTTAAGTGATGAGG-3′
Cpa2F	qPCR	5'-ACTCCTTGGGCTTACACACAATCAC-3′	300	Carboxypeptidase A2
Cpa2R	qPCR	5'-TGCGGCAGTAATAACGGCTTCATAT-3′
Slc5F	qPCR	5'-TTGAAGCAGTTAGACGCCGAAGAA-3′	199	Solute carrier family 5
Slc5R	qPCR	5'-CAGTAACCGAATCCGATGTACCAGT-3′
Slc10F	qPCR	5'-TGGTGGCGGAGCAAGTAATGTT-3′	222	Solute carrier family 10
Slc10R	qPCR	5'-GCTATTCCAAATCCAACGGGTATCA-3′
LyplF	qPCR	5'-AGCTTCGATGCCATCTTGGTTTGA-3′	183	Lysophospholipase
LyplR	qPCR	5'-AATAATGCTACCGCTCCACCTTGT-3′
FbpF	qPCR	5'-GGCACGTTATATTGGATCTATGGTA-3′	254	Fructose-1,6-bisphosphatase
FbpR	qPCR	5'-CTTCAACATCCTCTTTGCTTCCT-3′
qSodF	qPCR	5'-ACCAGTTGAGTTGGAAGTTGAA-3′	198	Superoxide dismutase
qSodR	qPCR	5'-CCATTACTATCAGCGGTCACAT-3′
qGstF	qPCR	5'-CGAGGATTAGCTCAATCAATTAGAC-3′	280	Glutathione S-transferase
qGstR	qPCR	5'-CTTGTACTTCTTCAGCCAACATAAG-3′
qGpxF	qPCR	5'-GCCACAGCCAAGAATTACAATC-3′	201	Glutathione peroxidase
qGpxR	qPCR	5'-AGCATTATCGCCATTCACTTCA-3′
qCatLF	qPCR	5′-GTGATGAAACTGATTTGATTAGACG-3′	280	Cathepsin L	MH136811
qCatLR	qPCR	5′-TATCTCTCCAATCCCACGAATTAGG-3′
DjEndGF	qPCR	5'-CTTAGAAGGTCCTTTGTGATGAG-3′	182	Endonuclease G
DjEndGR	qPCR	5'-TATTGTACGAACATCTTTGAGCC-3′
DjApaf1F	qPCR	5'-AACAGATGCACACCATTGGAAT-3′	279	Apoptotic protease activating factor-1
DjApaf1R	qPCR	5'-CCGCCGAAGTAAGATTGAAGAT-3′
DjCas-2F	qPCR	5'-CTACGGACAATAGAATCCATAACCA-3′	272	Caspase-2	MK252758
DjCas-2R	qPCR	5'-GGACATCATTACAACCACTGCTT-3′
DjCas-3aF	qPCR	5'-GGTCCAATCGAATTAGATCGCATA-3′	203	Caspase-3a	MK252759
DjCas-3aR	qPCR	5'-GCCACTGTAGAATATCCAATGAGAA-3′
DjCas-3bF	qPCR	5'-CTTAGATGGAGTGAGTATGATGGTT-3′	214	Caspase-3b	MK252760
DjCas-3bR	qPCR	5'-AATTATGCTATCGGCACTGACA-3′
DjCas-6F	qPCR	5'-CGTGGAAGTGAGCAAGATGTTA-3′	212	Caspase-6	MK252762
DjCas-6R	qPCR	5'-GACTCGTCAAAGCAATCAAAGAC-3′
DjCas-7F	qPCR	5'-GCTTGTCGTGGAGATAGATTTGATA-3′	165	Caspase-7	MK252761
DjCas-7R	qPCR	5'-CGCTTGAATATACCAACTGCCATT-3′
DjCas-8F	qPCR	5'-GGATGTGAAGGATGAAAGAGATTTG-3′	170	Caspase-8	KY214377
DjCas-8R	qPCR	5'-CATAACTGAGAGGACATACACCATT-3′
DjEF2F	qPCR	5'-TTAATGATGGGAAGATATGTTG-3'	250	Elongation factor-2
DjEF2R	qPCR	5'-GTACCATAGGATCTGACTTTGC-3'
