# Supplementary material for: Djhsp60 Is Required for Planarian Regeneration and Homeostasis
Source: Biomolecules. 2022 Jun 9;12(6):808. doi: 10.3390/biom12060808 (PMC9221281; doi:10.3390/biom12060808)
Supplement: Supplementary file 1 [file biomolecules-12-00808-s001.zip › Supplementary File 2 SmedHsp60 expression cell types.xlsx]

## Sheet: page_results
smed_20140614_transcript_id	description	dd_smes_v2 gene model ids	published transcript_id	published transcriptome	expressed_in term_name	expressed_in term_iri	specimen	specimen_iri	lifecycle	lifecycle_iri	evidence	evidence_iri	citation	citation pubmed_id
SMED30025522	60 kDa heat shock protein, mitochondrial	SMESG000065325.1	SmedASXL_008182	SmedAsxl_ww_GCZZ01	X1 cell	http://purl.obolibrary.org/obo/PLANA_0002109	FACS sorted cell population	http://purl.obolibrary.org/obo/PLANA_0002138	asexual adult	http://purl.obolibrary.org/obo/PLANA_0004504	RNA-sequencing evidence	http://purl.obolibrary.org/obo/ECO_0000295	Zhu et al., 2015	http://www.ncbi.nlm.nih.gov/pubmed/26114597
SMED30025522	60 kDa heat shock protein, mitochondrial	SMESG000065325.1	SmedASXL_008182	SmedAsxl_ww_GCZZ01	X2 cell	http://purl.obolibrary.org/obo/PLANA_0002111	FACS sorted cell population	http://purl.obolibrary.org/obo/PLANA_0002138	asexual adult	http://purl.obolibrary.org/obo/PLANA_0004504	RNA-sequencing evidence	http://purl.obolibrary.org/obo/ECO_0000295	Zhu et al., 2015	http://www.ncbi.nlm.nih.gov/pubmed/26114597
SMED30025522	60 kDa heat shock protein, mitochondrial	SMESG000065325.1	dd_Smed_v4_141_0_1	dd_Smed_v4	pharynx	http://purl.obolibrary.org/obo/PLANA_0000016	FACS sorted cell population	http://purl.obolibrary.org/obo/PLANA_0002138	asexual adult	http://purl.obolibrary.org/obo/PLANA_0004504	single-cell RNA-sequencing evidence	http://purl.obolibrary.org/obo/ECO_0001560	Fincher et al., 2018	http://www.ncbi.nlm.nih.gov/pubmed/29674431
SMED30025522	60 kDa heat shock protein, mitochondrial	SMESG000065325.1	dd_Smed_v4_141_0_1	dd_Smed_v4	protonephridia	http://purl.obolibrary.org/obo/PLANA_0000020	FACS sorted cell population	http://purl.obolibrary.org/obo/PLANA_0002138	asexual adult	http://purl.obolibrary.org/obo/PLANA_0004504	single-cell RNA-sequencing evidence	http://purl.obolibrary.org/obo/ECO_0001560	Fincher et al., 2018	http://www.ncbi.nlm.nih.gov/pubmed/29674431
SMED30025522	60 kDa heat shock protein, mitochondrial	SMESG000065325.1	dd_Smed_v4_141_0_1	dd_Smed_v4	nervous system	http://purl.obolibrary.org/obo/PLANA_0000025	FACS sorted cell population	http://purl.obolibrary.org/obo/PLANA_0002138	asexual adult	http://purl.obolibrary.org/obo/PLANA_0004504	single-cell RNA-sequencing evidence	http://purl.obolibrary.org/obo/ECO_0001560	Fincher et al., 2018	http://www.ncbi.nlm.nih.gov/pubmed/29674431
SMED30025522	60 kDa heat shock protein, mitochondrial	SMESG000065325.1	dd_Smed_v4_141_0_1	dd_Smed_v4	gut	http://purl.obolibrary.org/obo/PLANA_0000026	FACS sorted cell population	http://purl.obolibrary.org/obo/PLANA_0002138	asexual adult	http://purl.obolibrary.org/obo/PLANA_0004504	single-cell RNA-sequencing evidence	http://purl.obolibrary.org/obo/ECO_0001560	Fincher et al., 2018	http://www.ncbi.nlm.nih.gov/pubmed/29674431
SMED30025522	60 kDa heat shock protein, mitochondrial	SMESG000065325.1	dd_Smed_v4_141_0_1	dd_Smed_v4	epidermis	http://purl.obolibrary.org/obo/PLANA_0000034	FACS sorted cell population	http://purl.obolibrary.org/obo/PLANA_0002138	asexual adult	http://purl.obolibrary.org/obo/PLANA_0004504	single-cell RNA-sequencing evidence	http://purl.obolibrary.org/obo/ECO_0001560	Fincher et al., 2018	http://www.ncbi.nlm.nih.gov/pubmed/29674431
SMED30025522	60 kDa heat shock protein, mitochondrial	SMESG000065325.1	dd_Smed_v4_141_0_1	dd_Smed_v4	cephalic ganglia	http://purl.obolibrary.org/obo/PLANA_0000044	FACS sorted cell population	http://purl.obolibrary.org/obo/PLANA_0002138	asexual adult	http://purl.obolibrary.org/obo/PLANA_0004504	single-cell RNA-sequencing evidence	http://purl.obolibrary.org/obo/ECO_0001560	Fincher et al., 2018	http://www.ncbi.nlm.nih.gov/pubmed/29674431
SMED30025522	60 kDa heat shock protein, mitochondrial	SMESG000065325.1	dd_Smed_v4_141_0_1	dd_Smed_v4	neoblast	http://purl.obolibrary.org/obo/PLANA_0000429	FACS sorted cell population	http://purl.obolibrary.org/obo/PLANA_0002138	asexual adult	http://purl.obolibrary.org/obo/PLANA_0004504	single-cell RNA-sequencing evidence	http://purl.obolibrary.org/obo/ECO_0001560	Fincher et al., 2018	http://www.ncbi.nlm.nih.gov/pubmed/29674431
SMED30025522	60 kDa heat shock protein, mitochondrial	SMESG000065325.1	dd_Smed_v4_141_0_1	dd_Smed_v4	parenchyma	http://purl.obolibrary.org/obo/PLANA_0002142	FACS sorted cell population	http://purl.obolibrary.org/obo/PLANA_0002138	asexual adult	http://purl.obolibrary.org/obo/PLANA_0004504	single-cell RNA-sequencing evidence	http://purl.obolibrary.org/obo/ECO_0001560	Fincher et al., 2018	http://www.ncbi.nlm.nih.gov/pubmed/29674431
SMED30025522	60 kDa heat shock protein, mitochondrial	SMESG000065325.1	dd_Smed_v4_141_0_1	dd_Smed_v4	parenchymal cell	http://purl.obolibrary.org/obo/PLANA_0003116	FACS sorted cell population	http://purl.obolibrary.org/obo/PLANA_0002138	asexual adult	http://purl.obolibrary.org/obo/PLANA_0004504	single-cell RNA-sequencing evidence	http://purl.obolibrary.org/obo/ECO_0001560	Fincher et al., 2018	http://www.ncbi.nlm.nih.gov/pubmed/29674431
SMED30025522	60 kDa heat shock protein, mitochondrial	SMESG000065325.1	dd_Smed_v4_141_0_1	dd_Smed_v4	muscle cell	http://purl.obolibrary.org/obo/PLANA_0000101	FACS sorted cell population	http://purl.obolibrary.org/obo/PLANA_0002138	asexual adult	http://purl.obolibrary.org/obo/PLANA_0004504	single-cell RNA-sequencing evidence	http://purl.obolibrary.org/obo/ECO_0001560	Fincher et al., 2018	http://www.ncbi.nlm.nih.gov/pubmed/29674431
SMED30025522	60 kDa heat shock protein, mitochondrial	SMESG000065325.1	dd_Smed_v4_141_0_1	dd_Smed_v4	non-ciliated neuron	http://purl.obolibrary.org/obo/PLANA_0007566	FACS sorted cell population	http://purl.obolibrary.org/obo/PLANA_0002138	asexual adult	http://purl.obolibrary.org/obo/PLANA_0004504	single-cell RNA-sequencing evidence	http://purl.obolibrary.org/obo/ECO_0001560	Fincher et al., 2018	http://www.ncbi.nlm.nih.gov/pubmed/29674431
SMED30025522	60 kDa heat shock protein, mitochondrial	SMESG000065325.1	dd_Smed_v4_141_0_1	dd_Smed_v4	cilated neuron	http://purl.obolibrary.org/obo/PLANA_0007567	FACS sorted cell population	http://purl.obolibrary.org/obo/PLANA_0002138	asexual adult	http://purl.obolibrary.org/obo/PLANA_0004504	single-cell RNA-sequencing evidence	http://purl.obolibrary.org/obo/ECO_0001560	Fincher et al., 2018	http://www.ncbi.nlm.nih.gov/pubmed/29674431
SMED30025522	60 kDa heat shock protein, mitochondrial	SMESG000032910.1;SMESG000032921.1	Contig2861	GPL15192	Smed sexual biotype	http://purl.obolibrary.org/obo/PLANA_0000027	FACS sorted cell population	http://purl.obolibrary.org/obo/PLANA_0002138	adult hermaphrodite	http://purl.obolibrary.org/obo/PLANA_0004503	single-cell RNA-sequencing evidence	http://purl.obolibrary.org/obo/ECO_0001560	Fincher et al., 2018	http://www.ncbi.nlm.nih.gov/pubmed/29674431
SMED30025522	60 kDa heat shock protein, mitochondrial	SMESG000065325.1	Contig36204	uc_Smed_v2	Smed sexual biotype	http://purl.obolibrary.org/obo/PLANA_0000027	FACS sorted cell population	http://purl.obolibrary.org/obo/PLANA_0002138	adult hermaphrodite	http://purl.obolibrary.org/obo/PLANA_0004503	single-cell RNA-sequencing evidence	http://purl.obolibrary.org/obo/ECO_0001560	Fincher et al., 2018	http://www.ncbi.nlm.nih.gov/pubmed/29674431
SMED30025522	60 kDa heat shock protein, mitochondrial	SMESG000065325.1	Contig36204	newmark_ests	Smed sexual biotype	http://purl.obolibrary.org/obo/PLANA_0000027	FACS sorted cell population	http://purl.obolibrary.org/obo/PLANA_0002138	adult hermaphrodite	http://purl.obolibrary.org/obo/PLANA_0004503	single-cell RNA-sequencing evidence	http://purl.obolibrary.org/obo/ECO_0001560	Fincher et al., 2018	http://www.ncbi.nlm.nih.gov/pubmed/29674431
SMED30025522	60 kDa heat shock protein, mitochondrial	SMESG000065325.1	Contig2861	GPL15192	Smed sexual biotype	http://purl.obolibrary.org/obo/PLANA_0000027	FACS sorted cell population	http://purl.obolibrary.org/obo/PLANA_0002138	adult hermaphrodite	http://purl.obolibrary.org/obo/PLANA_0004503	single-cell RNA-sequencing evidence	http://purl.obolibrary.org/obo/ECO_0001560	Fincher et al., 2018	http://www.ncbi.nlm.nih.gov/pubmed/29674431
SMED30025522	60 kDa heat shock protein, mitochondrial	SMESG000065325.1	SMED30025522	smed_20140614	gut	http://purl.obolibrary.org/obo/PLANA_0000026	whole organism	http://purl.obolibrary.org/obo/PLANA_0000136	asexual adult	http://purl.obolibrary.org/obo/PLANA_0004504	colorimetric in situ hybridization evidence	http://purl.obolibrary.org/obo/ECO_0001839	Tu et al., 2015	http://www.ncbi.nlm.nih.gov/pubmed/26457503
SMED30025522	60 kDa heat shock protein, mitochondrial	SMESG000065325.1	SMED30025522	smed_20140614	parenchyma	http://purl.obolibrary.org/obo/PLANA_0002142	whole organism	http://purl.obolibrary.org/obo/PLANA_0000136	asexual adult	http://purl.obolibrary.org/obo/PLANA_0004504	colorimetric in situ hybridization evidence	http://purl.obolibrary.org/obo/ECO_0001839	Tu et al., 2015	http://www.ncbi.nlm.nih.gov/pubmed/26457503
SMED30025522	60 kDa heat shock protein, mitochondrial	SMESG000065325.1	CUFF.325473.1	be_Smed_v2	X1 cell	http://purl.obolibrary.org/obo/PLANA_0002109	FACS sorted cell population	http://purl.obolibrary.org/obo/PLANA_0002138	asexual adult	http://purl.obolibrary.org/obo/PLANA_0004504	RNA-sequencing evidence	http://purl.obolibrary.org/obo/ECO_0000295	Onal et al., 2012	http://www.ncbi.nlm.nih.gov/pubmed/22543868
SMED30025522	60 kDa heat shock protein, mitochondrial	SMESG000065325.1	isotig19365	be_Smed_v2	X1 cell	http://purl.obolibrary.org/obo/PLANA_0002109	FACS sorted cell population	http://purl.obolibrary.org/obo/PLANA_0002138	asexual adult	http://purl.obolibrary.org/obo/PLANA_0004504	RNA-sequencing evidence	http://purl.obolibrary.org/obo/ECO_0000295	Onal et al., 2012	http://www.ncbi.nlm.nih.gov/pubmed/22543868
SMED30025522	60 kDa heat shock protein, mitochondrial	SMESG000065325.1	dd_Smed_v6_141_0	dd_Smed_v6	Category 2 cell	http://purl.obolibrary.org/obo/PLANA_0000028	FACS sorted cell population	http://purl.obolibrary.org/obo/PLANA_0002138	asexual adult	http://purl.obolibrary.org/obo/PLANA_0004504	single-cell RNA-sequencing evidence	http://purl.obolibrary.org/obo/ECO_0001560	Plass et al., 2018	http://www.ncbi.nlm.nih.gov/pubmed/29674432
SMED30025522	60 kDa heat shock protein, mitochondrial	SMESG000065325.1	dd_Smed_v6_141_0	dd_Smed_v6	gamma neoblast	http://purl.obolibrary.org/obo/PLANA_0000039	FACS sorted cell population	http://purl.obolibrary.org/obo/PLANA_0002138	asexual adult	http://purl.obolibrary.org/obo/PLANA_0004504	single-cell RNA-sequencing evidence	http://purl.obolibrary.org/obo/ECO_0001560	Plass et al., 2018	http://www.ncbi.nlm.nih.gov/pubmed/29674432
SMED30025522	60 kDa heat shock protein, mitochondrial	SMESG000065325.1	dd_Smed_v6_141_0	dd_Smed_v6	progenitor cell	http://purl.obolibrary.org/obo/PLANA_0000120	FACS sorted cell population	http://purl.obolibrary.org/obo/PLANA_0002138	asexual adult	http://purl.obolibrary.org/obo/PLANA_0004504	single-cell RNA-sequencing evidence	http://purl.obolibrary.org/obo/ECO_0001560	Plass et al., 2018	http://www.ncbi.nlm.nih.gov/pubmed/29674432
SMED30025522	60 kDa heat shock protein, mitochondrial	SMESG000065325.1	dd_Smed_v6_141_0	dd_Smed_v6	neoblast	http://purl.obolibrary.org/obo/PLANA_0000429	FACS sorted cell population	http://purl.obolibrary.org/obo/PLANA_0002138	asexual adult	http://purl.obolibrary.org/obo/PLANA_0004504	single-cell RNA-sequencing evidence	http://purl.obolibrary.org/obo/ECO_0001560	Plass et al., 2018	http://www.ncbi.nlm.nih.gov/pubmed/29674432
SMED30025522	60 kDa heat shock protein, mitochondrial	SMESG000065325.1	H.21.6h	smed_ncbi_20200123	Category 4 cell	http://purl.obolibrary.org/obo/PLANA_0000018	whole organism	http://purl.obolibrary.org/obo/PLANA_0000136	asexual adult	http://purl.obolibrary.org/obo/PLANA_0004504	cDNA to DNA expression microarray evidence	http://purl.obolibrary.org/obo/ECO_0000097	Eisenhoffer et al., 2008	http://www.ncbi.nlm.nih.gov/pubmed/18786419
SMED30025522	60 kDa heat shock protein, mitochondrial	SMESG000065325.1	H.21.6h	smed_ncbi_20200123	Category 4 cell	http://purl.obolibrary.org/obo/PLANA_0000018	whole organism	http://purl.obolibrary.org/obo/PLANA_0000136	asexual adult	http://purl.obolibrary.org/obo/PLANA_0004504	colorimetric in situ hybridization evidence	http://purl.obolibrary.org/obo/ECO_0001839	Eisenhoffer et al., 2008	http://www.ncbi.nlm.nih.gov/pubmed/18786419
SMED30025522	60 kDa heat shock protein, mitochondrial	SMESG000065325.1	GU591874	smed_ncbi_20200123	neoblast	http://purl.obolibrary.org/obo/PLANA_0000429	whole organism	http://purl.obolibrary.org/obo/PLANA_0000136	asexual adult	http://purl.obolibrary.org/obo/PLANA_0004504	colorimetric in situ hybridization evidence	http://purl.obolibrary.org/obo/ECO_0001839	Fernmandez-Taboada et al., 2011	http://www.ncbi.nlm.nih.gov/pubmed/21356107
