# Supplementary material for: Djhsp60 Is Required for Planarian Regeneration and Homeostasis
Source: Biomolecules. 2022 Jun 9;12(6):808. doi: 10.3390/biom12060808 (PMC9221281; doi:10.3390/biom12060808)
Supplement: Supplementary file 1 [file biomolecules-12-00808-s001.zip › Supplementary File 3 Transcripts related to mitochondrial function and protein synthesis.xlsx]

## Sheet: Sheet1
Transcripts related to mitochondrial function and protein synthesis
Gene_id	NR annotation	log2FoldChange
Parkinson's disease
TRINITY_DN10515_c0_g2_i1	Cytochrome c	-2.49262
TRINITY_DN10562_c0_g1_i1	Cytochrome c oxidase subunit 4	-3.24049
TRINITY_DN11507_c1_g1_i1	NADH dehydrogenase (ubiquinone) 1 alpha subcomplex subunit 7	-3.27475
TRINITY_DN11632_c0_g1_i1	NADH dehydrogenase [ubiquinone] 1 alpha subcomplex subunit 10	-2.85669
TRINITY_DN12018_c0_g1_i1	NADH dehydrogenase [ubiquinone] 1 beta subcomplex subunit 8	-2.85242
TRINITY_DN12067_c0_g1_i1	NADH dehydrogenase (ubiquinone) 1 alpha subcomplex subunit 12	-3.17018
TRINITY_DN12391_c0_g1_i1	Cytochrome c oxidase subunit 1	-2.44621
TRINITY_DN12708_c0_g2_i1	Voltage-dependent anion-selective channel protein 2	-3.27632
TRINITY_DN12824_c0_g2_i1	NADH-ubiquinone oxidoreductase chain 1	-3.37321
TRINITY_DN12901_c0_g1_i1	Cytochrome b-c1 complex subunit 7	-3.10172
TRINITY_DN13722_c0_g2_i1	NADH dehydrogenase (ubiquinone) 1 beta subcomplex subunit 4	-2.61933
TRINITY_DN14212_c0_g1_i1	NADH dehydrogenase [ubiquinone] 1 beta subcomplex subunit 10	-2.75652
TRINITY_DN14322_c0_g1_i1	Ubiquitin-like modifier-activating enzyme 1	-3.13714
TRINITY_DN14476_c0_g2_i1	ATP synthase F(0) complex subunit C2, mitochondrial	-3.55504
TRINITY_DN1468_c0_g1_i1	Cytochrome c oxidase subunit 3	-4.01766
TRINITY_DN15001_c0_g1_i1	Succinate dehydrogenase cytochrome b560 subunit, mitochondrial	-2.79198
TRINITY_DN15189_c0_g2_i1	NADH dehydrogenase [ubiquinone] iron-sulfur protein 7	-4.14954
TRINITY_DN15204_c0_g1_i1	NADH dehydrogenase [ubiquinone] 1 beta subcomplex subunit 5	-3.0579
TRINITY_DN15206_c1_g1_i1	NADH dehydrogenase [ubiquinone] 1 alpha subcomplex subunit 5	-3.15046
TRINITY_DN15581_c0_g1_i1	Succinate dehydrogenase [ubiquinone] cytochrome b small subunit	-2.61275
TRINITY_DN15739_c0_g2_i1	Voltage-dependent anion-selective channel protein 2	-2.89601
TRINITY_DN15875_c0_g1_i1	ATP synthase subunit O, mitochondrial	-3.37509
TRINITY_DN16003_c0_g2_i1	Peptidyl-prolyl cis-trans isomerase	-2.84387
TRINITY_DN16572_c0_g2_i1	Cytochrome c1, heme protein, mitochondrial	-2.55608
TRINITY_DN17340_c0_g2_i1	NADH dehydrogenase (ubiquinone) 1 beta subcomplex subunit 6	-3.25955
TRINITY_DN17541_c0_g1_i1	NADH dehydrogenase [ubiquinone] iron-sulfur protein 4	-3.29815
TRINITY_DN17711_c0_g3_i1	NADH dehydrogenase (ubiquinone) Fe-S protein 8	-4.0263
TRINITY_DN18732_c0_g1_i1	Cytochrome c oxidase subunit 5b	-3.08012
TRINITY_DN19615_c0_g2_i1	Ubiquitin-conjugating enzyme E2 L3	-2.85862
TRINITY_DN2007_c0_g1_i1	NADH dehydrogenase subunit 5	-3.45998
TRINITY_DN20313_c0_g2_i1	Cytochrome b-c1 complex subunit Rieske, mitochondrial	-2.7871
TRINITY_DN20323_c0_g2_i1	Peptidyl-prolyl cis-trans isomerase	-1.59908
TRINITY_DN20722_c0_g2_i1	Guanine nucleotide-binding protein G(i) subunit alpha	-3.37497
TRINITY_DN22094_c0_g2_i1	ATP synthase subunit gamma, mitochondrial	-2.97436
TRINITY_DN22296_c0_g1_i1	NADH dehydrogenase [ubiquinone] iron-sulfur protein 7	-3.70487
TRINITY_DN2380_c0_g1_i1	Cytochrome c oxidase subunit 5A, mitochondrial	-3.01329
TRINITY_DN2467_c0_g1_i1	NADH dehydrogenase [ubiquinone] 1 beta subcomplex subunit 3	-2.72262
TRINITY_DN25208_c0_g2_i1	Cytochrome b-c1 complex subunit 2, mitochondrial	-2.67915
TRINITY_DN25463_c0_g1_i1	NADH dehydrogenase [ubiquinone] 1 alpha subcomplex subunit 9	-3.48588
TRINITY_DN25567_c0_g2_i1	Succinate dehydrogenase [ubiquinone] flavoprotein subunit	-3.22531
TRINITY_DN2644_c0_g1_i1	ATP synthase subunit b, mitochondrial	-2.81697
TRINITY_DN2754_c0_g1_i1	Cytochrome b	-3.76671
TRINITY_DN29821_c0_g1_i1	ATP synthase subunit 6	-3.75718
TRINITY_DN30079_c0_g1_i1	Cytochrome c oxidase subunit 2	-3.28966
TRINITY_DN30940_c0_g1_i1	Cytochrome c oxidase subunit 6	-2.82019
TRINITY_DN31378_c0_g1_i1	Cytochrome c oxidase subunit 1	-2.98718
TRINITY_DN33183_c0_g1_i1	NADH dehydrogenase [ubiquinone] 1 beta subcomplex subunit 7	-2.68694
TRINITY_DN9683_c0_g1_i1	Peptidyl-prolyl cis-trans isomerase	-3.26736
Alzheimer's disease
TRINITY_DN10515_c0_g2_i1	Cytochrome c	-2.49262
TRINITY_DN10562_c0_g1_i1	Cytochrome c oxidase subunit 4	-3.24049
TRINITY_DN11507_c1_g1_i1	NADH dehydrogenase (ubiquinone) 1 alpha	-3.27475
TRINITY_DN11632_c0_g1_i1	NADH dehydrogenase [ubiquinone] 1 alpha subcomplex subunit 10	-2.85669
TRINITY_DN12018_c0_g1_i1	NADH dehydrogenase [ubiquinone] 1 beta subcomplex subunit 8	-2.85242
TRINITY_DN12067_c0_g1_i1	NADH dehydrogenase (ubiquinone) 1 alpha subcomplex subunit 12	-3.17018
TRINITY_DN12391_c0_g1_i1	Cytochrome c oxidase subunit 1	-2.44621
TRINITY_DN12901_c0_g1_i1	Cytochrome b-c1 complex subunit 7	-3.10172
TRINITY_DN12943_c0_g1_i1	Gamma-secretase subunit Aph-1	-3.17774
TRINITY_DN13617_c0_g1_i1	Vitellogenin receptor	-3.22958
TRINITY_DN13722_c0_g2_i1	NADH dehydrogenase (ubiquinone) 1 beta subcomplex subunit 4	-2.61933
TRINITY_DN14212_c0_g1_i1	NADH dehydrogenase [ubiquinone] 1 beta subcomplex subunit 10	-2.75652
TRINITY_DN14476_c0_g2_i1	ATP synthase F(0) complex subunit C2, mitochondrial	-3.55504
TRINITY_DN1468_c0_g1_i1	Cytochrome c oxidase subunit 3	-4.01766
TRINITY_DN15001_c0_g1_i1	Succinate dehydrogenase cytochrome b560 subunit, mitochondrial	-2.79198
TRINITY_DN15189_c0_g2_i1	NADH dehydrogenase [ubiquinone] iron-sulfur protein 7	-4.14954
TRINITY_DN15204_c0_g1_i1	NADH dehydrogenase [ubiquinone] 1 beta subcomplex subunit 5	-3.0579
TRINITY_DN15206_c1_g1_i1	NADH dehydrogenase [ubiquinone] 1 alpha subcomplex subunit 5	-3.15046
TRINITY_DN15581_c0_g1_i1	Succinate dehydrogenase [ubiquinone] cytochrome b small subunit	-2.61275
TRINITY_DN15875_c0_g1_i1	ATP synthase subunit O, mitochondrial	-3.37509
TRINITY_DN16572_c0_g2_i1	Cytochrome c1, heme protein, mitochondrial	-2.55608
TRINITY_DN17340_c0_g2_i1	NADH dehydrogenase (ubiquinone) 1 beta subcomplex subunit 6	-3.25955
TRINITY_DN17541_c0_g1_i1	NADH dehydrogenase [ubiquinone] iron-sulfur protein 4	-3.29815
TRINITY_DN17711_c0_g3_i1	NADH dehydrogenase (ubiquinone) Fe-S protein 8	-4.0263
TRINITY_DN18732_c0_g1_i1	Cytochrome c oxidase subunit 5b	-3.08012
TRINITY_DN20313_c0_g2_i1	Cytochrome b-c1 complex subunit Rieske, mitochondrial	-2.7871
TRINITY_DN21989_c0_g1_i1	3-hydroxyacyl-CoA dehydrogenase type-2	-3.13861
TRINITY_DN22017_c0_g1_i4	Putative vitellogenin receptor	-2.83873
TRINITY_DN22094_c0_g2_i1	ATP synthase subunit gamma, mitochondrial	-2.97436
TRINITY_DN22296_c0_g1_i1	NADH dehydrogenase [ubiquinone] iron-sulfur protein 7	-3.70487
TRINITY_DN23533_c0_g3_i1	Presenilin-1	-3.04653
TRINITY_DN23606_c0_g2_i1	Amyloid-beta-like protein	-2.98236
TRINITY_DN2380_c0_g1_i1	Cytochrome c oxidase subunit 5A, mitochondrial	-3.01329
TRINITY_DN2467_c0_g1_i1	NADH dehydrogenase [ubiquinone] 1 beta subcomplex subunit 3	-2.72262
TRINITY_DN25208_c0_g2_i1	Cytochrome b-c1 complex subunit 2, mitochondrial	-2.67915
TRINITY_DN25463_c0_g1_i1	NADH dehydrogenase [ubiquinone] 1 alpha subcomplex subunit 9	-3.48588
TRINITY_DN25567_c0_g2_i1	Succinate dehydrogenase [ubiquinone] flavoprotein subunit	-3.22531
TRINITY_DN2644_c0_g1_i1	ATP synthase subunit b, mitochondrial	-2.81697
TRINITY_DN26453_c0_g4_i1	Serine/threonine-protein kinase/endoribonuclease IRE2	-6.35769
TRINITY_DN2754_c0_g1_i1	Cytochrome b	-3.76671
TRINITY_DN29821_c0_g1_i1	ATP synthase subunit 6	-3.75718
TRINITY_DN30079_c0_g1_i1	Cytochrome c oxidase subunit 2	-3.28966
TRINITY_DN30940_c0_g1_i1	Cytochrome c oxidase subunit 6	-2.82019
TRINITY_DN31378_c0_g1_i1	Cytochrome c oxidase subunit 1	-2.98718
TRINITY_DN33183_c0_g1_i1	NADH dehydrogenase [ubiquinone] 1 beta subcomplex subunit 7	-2.68694
Huntington's disease
TRINITY_DN10515_c0_g2_i1	Cytochrome c	-2.49262
TRINITY_DN10562_c0_g1_i1	Cytochrome c oxidase subunit 4	-3.24049
TRINITY_DN11507_c1_g1_i1	NADH dehydrogenase (ubiquinone) 1 alpha subcomplex subunit 7	-3.27475
TRINITY_DN11632_c0_g1_i1	NADH dehydrogenase [ubiquinone] 1 alpha subcomplex subunit 10	-2.85669
TRINITY_DN12018_c0_g1_i1	NADH dehydrogenase [ubiquinone] 1 beta subcomplex subunit 8	-2.85242
TRINITY_DN12067_c0_g1_i1	NADH dehydrogenase (ubiquinone) 1 alpha subcomplex subunit 12	-3.17018
TRINITY_DN12391_c0_g1_i1	Cytochrome c oxidase subunit 1	-2.44621
TRINITY_DN12708_c0_g2_i1	Voltage-dependent anion-selective channel protein 2	-3.27632
TRINITY_DN12901_c0_g1_i1	Cytochrome b-c1 complex subunit 7	-3.10172
TRINITY_DN1309_c0_g1_i1	DNA-directed RNA polymerase II subunit RPB4	-3.23001
TRINITY_DN13722_c0_g2_i1	NADH dehydrogenase (ubiquinone) 1 beta subcomplex subunit 4	-2.61933
TRINITY_DN14212_c0_g1_i1	NADH dehydrogenase [ubiquinone] 1 beta subcomplex subunit 10	-2.75652
TRINITY_DN14476_c0_g2_i1	ATP synthase F(0) complex subunit C2, mitochondrial	-3.55504
TRINITY_DN1468_c0_g1_i1	Cytochrome c oxidase subunit 3	-4.01766
TRINITY_DN15001_c0_g1_i1	Succinate dehydrogenase cytochrome b560 subunit, mitochondrial	-2.79198
TRINITY_DN15189_c0_g2_i1	NADH dehydrogenase [ubiquinone] iron-sulfur protein 7	-4.14954
TRINITY_DN15204_c0_g1_i1	NADH dehydrogenase [ubiquinone] 1 beta subcomplex subunit 5	-3.0579
TRINITY_DN15206_c1_g1_i1	NADH dehydrogenase [ubiquinone] 1 alpha subcomplex subunit 5	-3.15046
TRINITY_DN15581_c0_g1_i1	Succinate dehydrogenase [ubiquinone] cytochrome b small subunit	-2.61275
TRINITY_DN15739_c0_g2_i1	Voltage-dependent anion-selective channel protein 2	-2.89601
TRINITY_DN15875_c0_g1_i1	ATP synthase subunit O, mitochondrial	-3.37509
TRINITY_DN16003_c0_g2_i1	Peptidyl-prolyl cis-trans isomerase	-2.84387
TRINITY_DN16572_c0_g2_i1	Cytochrome c1, heme protein, mitochondrial	-2.55608
TRINITY_DN17340_c0_g2_i1	NADH dehydrogenase (ubiquinone) 1 beta subcomplex subunit 6	-3.25955
TRINITY_DN17541_c0_g1_i1	NADH dehydrogenase [ubiquinone] iron-sulfur protein 4	-3.29815
TRINITY_DN17711_c0_g3_i1	NADH dehydrogenase (ubiquinone) Fe-S protein 8	-4.0263
TRINITY_DN17766_c0_g1_i1	DNA-directed RNA polymerase II subunit RPB3	-3.39942
TRINITY_DN18732_c0_g1_i1	Cytochrome c oxidase subunit 5b	-3.08012
TRINITY_DN18795_c0_g1_i1	Superoxide dismutase [Cu-Zn]	-3.20783
TRINITY_DN18801_c0_g2_i1	DNA directed RNA polymerases I	-2.70069
TRINITY_DN18869_c0_g3_i1	Huntingtin	-6.00719
TRINITY_DN20313_c0_g2_i1	Cytochrome b-c1 complex subunit Rieske, mitochondrial	-2.7871
TRINITY_DN20323_c0_g2_i1	Peptidyl-prolyl cis-trans isomerase	-1.59908
TRINITY_DN21092_c0_g1_i1	Dynactin subunit 2-B	-2.97066
TRINITY_DN22034_c0_g1_i1	Dynein beta chain	-3.43472
TRINITY_DN22094_c0_g2_i1	ATP synthase subunit gamma, mitochondrial	-2.97436
TRINITY_DN22296_c0_g1_i1	NADH dehydrogenase [ubiquinone] iron-sulfur protein 7	-3.70487
TRINITY_DN23292_c0_g1_i1	Histone deacetylase 1	-2.8291
TRINITY_DN23564_c0_g2_i1	Dynein heavy chain 12	-5.16946
TRINITY_DN2380_c0_g1_i1	Cytochrome c oxidase subunit 5A, mitochondrial	-3.01329
TRINITY_DN2467_c0_g1_i1	NADH dehydrogenase [ubiquinone] 1 beta subcomplex subunit 3	-2.72262
TRINITY_DN25208_c0_g2_i1	Cytochrome b-c1 complex subunit 2, mitochondrial	-2.67915
TRINITY_DN25463_c0_g1_i1	NADH dehydrogenase [ubiquinone] 1 alpha subcomplex subunit 9	-3.48588
TRINITY_DN25538_c0_g3_i1	AP-1 complex subunit beta-1-like	-2.61039
TRINITY_DN25567_c0_g2_i1	Succinate dehydrogenase [ubiquinone] flavoprotein subunit	-3.22531
TRINITY_DN25595_c0_g1_i1	Dynein intermediate chain 3	-2.92071
TRINITY_DN2644_c0_g1_i1	ATP synthase subunit b, mitochondrial	-2.81697
TRINITY_DN26659_c0_g2_i2	AP-2 complex subunit	-3.11721
TRINITY_DN27274_c0_g1_i1	Histone acetyltransferase	-3.08256
TRINITY_DN2754_c0_g1_i1	Cytochrome b	-3.76671
TRINITY_DN28337_c0_g2_i1	Dynein heavy chain 7, axonemal	-4.80689
TRINITY_DN29821_c0_g1_i1	ATP synthase subunit 6	-3.75718
TRINITY_DN30079_c0_g1_i1	Cytochrome c oxidase subunit 2	-3.28966
TRINITY_DN30940_c0_g1_i1	Cytochrome c oxidase subunit 6	-2.82019
TRINITY_DN31378_c0_g1_i1	Cytochrome c oxidase subunit 1	-2.98718
TRINITY_DN33183_c0_g1_i1	NADH dehydrogenase [ubiquinone] 1 beta subcomplex subunit 7	-2.68694
TRINITY_DN9548_c0_g1_i1	TATA-box-binding protein	-3.79119
TRINITY_DN9683_c0_g1_i1	Peptidyl-prolyl cis-trans isomerase	-3.26736
Oxidative phosphorylation
TRINITY_DN10562_c0_g1_i1	Cytochrome c oxidase subunit 4	-3.24049
TRINITY_DN11507_c1_g1_i1	NADH dehydrogenase (ubiquinone) 1 alpha subcomplex subunit 7	-3.27475
TRINITY_DN11632_c0_g1_i1	NADH dehydrogenase [ubiquinone] 1 alpha subcomplex subunit 10	-2.85669
TRINITY_DN12018_c0_g1_i1	NADH dehydrogenase [ubiquinone] 1 beta subcomplex subunit 8	-2.85242
TRINITY_DN12067_c0_g1_i1	NADH dehydrogenase (ubiquinone) 1 alpha subcomplex subunit 12	-3.17018
TRINITY_DN12391_c0_g1_i1	Cytochrome c oxidase subunit 1	-2.44621
TRINITY_DN12824_c0_g2_i1	NADH-ubiquinone oxidoreductase chain 1	-3.37321
TRINITY_DN12901_c0_g1_i1	Cytochrome b-c1 complex subunit 7	-3.10172
TRINITY_DN13722_c0_g2_i1	NADH dehydrogenase (ubiquinone) 1 beta subcomplex subunit 4	-2.61933
TRINITY_DN14212_c0_g1_i1	NADH dehydrogenase [ubiquinone] 1 beta subcomplex subunit 10	-2.75652
TRINITY_DN14476_c0_g2_i1	ATP synthase F(0) complex subunit C2, mitochondrial	-3.55504
TRINITY_DN1468_c0_g1_i1	Cytochrome c oxidase subunit 3	-4.01766
TRINITY_DN15001_c0_g1_i1	Succinate dehydrogenase cytochrome b560 subunit, mitochondrial	-2.79198
TRINITY_DN15189_c0_g2_i1	NADH dehydrogenase [ubiquinone] iron-sulfur protein 7	-4.14954
TRINITY_DN15204_c0_g1_i1	NADH dehydrogenase [ubiquinone] 1 beta subcomplex subunit 5	-3.0579
TRINITY_DN15206_c1_g1_i1	NADH dehydrogenase [ubiquinone] 1 alpha subcomplex subunit 5	-3.15046
TRINITY_DN15581_c0_g1_i1	Succinate dehydrogenase [ubiquinone] cytochrome b small subunit	-2.61275
TRINITY_DN15875_c0_g1_i1	ATP synthase subunit O, mitochondrial	-3.37509
TRINITY_DN16572_c0_g2_i1	Cytochrome c1, heme protein, mitochondrial	-2.55608
TRINITY_DN17340_c0_g2_i1	NADH dehydrogenase (ubiquinone) 1 beta subcomplex subunit 6	-3.25955
TRINITY_DN17541_c0_g1_i1	NADH dehydrogenase [ubiquinone] iron-sulfur protein 4	-3.29815
TRINITY_DN17711_c0_g3_i1	NADH dehydrogenase (ubiquinone) Fe-S protein 8	-4.0263
TRINITY_DN17954_c0_g1_i1	V-type proton ATPase 21 kDa proteolipid subunit	-2.84138
TRINITY_DN18732_c0_g1_i1	Cytochrome c oxidase subunit 5b	-3.08012
TRINITY_DN2007_c0_g1_i1	NADH dehydrogenase subunit 5	-3.45998
TRINITY_DN20313_c0_g2_i1	Cytochrome b-c1 complex subunit Rieske, mitochondrial	-2.7871
TRINITY_DN20540_c0_g1_i1	V-type proton ATPase subunit E-like	-2.6245
TRINITY_DN21137_c0_g1_i1	V-type proton ATPase 16 kDa proteolipid subunit	-3.10706
TRINITY_DN22094_c0_g2_i1	ATP synthase subunit gamma, mitochondrial	-2.97436
TRINITY_DN22296_c0_g1_i1	NADH dehydrogenase [ubiquinone] iron-sulfur protein 7	-3.70487
TRINITY_DN2380_c0_g1_i1	Cytochrome c oxidase subunit 5A, mitochondrial	-3.01329
TRINITY_DN24468_c0_g2_i1	V-type proton ATPase subunit B	-3.1003
TRINITY_DN2467_c0_g1_i1	NADH dehydrogenase [ubiquinone] 1 beta subcomplex subunit 3	-2.72262
TRINITY_DN25208_c0_g2_i1	Cytochrome b-c1 complex subunit 2, mitochondrial	-2.67915
TRINITY_DN25463_c0_g1_i1	NADH dehydrogenase [ubiquinone] 1 alpha subcomplex subunit 9	-3.48588
TRINITY_DN25567_c0_g2_i1	Succinate dehydrogenase [ubiquinone] flavoprotein subunit	-3.22531
TRINITY_DN2644_c0_g1_i1	ATP synthase subunit b, mitochondrial	-2.81697
TRINITY_DN27412_c0_g1_i4	V-type proton ATPase 116 kDa subunit	-2.50372
TRINITY_DN2754_c0_g1_i1	Cytochrome b	-3.76671
TRINITY_DN29821_c0_g1_i1	ATP synthase subunit 6	-3.75718
TRINITY_DN30079_c0_g1_i1	Cytochrome c oxidase subunit 2	-3.28966
TRINITY_DN30940_c0_g1_i1	Cytochrome c oxidase subunit 6	-2.82019
TRINITY_DN31378_c0_g1_i1	Cytochrome c oxidase subunit 1	-2.98718
TRINITY_DN33183_c0_g1_i1	NADH dehydrogenase [ubiquinone] 1 beta subcomplex subunit 7	-2.68694
TRINITY_DN3997_c0_g1_i1	ATP synthase subunit g, mitochondrial	-2.9979
TRINITY_DN6906_c0_g1_i1	V-type proton ATPase subunit F	-3.5811
TRINITY_DN7835_c0_g1_i1	V-type proton ATPase subunit e 1	-2.68612
TRINITY_DN8352_c1_g1_i1	Putative ATP synthase subunit f, mitochondrial	-2.96134
Citrate cycle (TCA cycle)
TRINITY_DN15001_c0_g1_i1	Succinate dehydrogenase cytochrome b560 subunit, mitochondrial	-2.79198
TRINITY_DN15581_c0_g1_i1	Succinate dehydrogenase [ubiquinone] cytochrome b small subunit	-2.61275
TRINITY_DN18201_c0_g2_i1	Succinate--CoA ligase [ADP/GDP-forming] subunit alpha	-2.69525
TRINITY_DN19807_c0_g2_i1	Isocitrate dehydrogenase [NADP], mitochondrial	-2.90184
TRINITY_DN23754_c0_g1_i1	Pyruvate dehydrogenase protein X component	-2.94443
TRINITY_DN23972_c0_g3_i1	Dihydrolipoyllysine-residue succinyltransferase	-3.41457
TRINITY_DN25118_c0_g1_i1	Fumarate hydratase	-3.02109
TRINITY_DN25139_c0_g2_i1	Succinyl-CoA ligase [ADP-forming] subunit beta	-2.88651
TRINITY_DN25567_c0_g2_i1	Succinate dehydrogenase [ubiquinone] flavoprotein subunit	-3.22531
TRINITY_DN25953_c0_g2_i2	Dihydrolipoyllysine-residue acetyltransferase	-2.96235
TRINITY_DN26190_c0_g2_i1	Probable aconitate hydratase, mitochondrial	-2.7178
Ribosome
TRINITY_DN11734_c0_g2_i1	Ribosomal protein L35 mitochondrial	-3.4113
TRINITY_DN19625_c0_g1_i1	Ribosomal protein L24	-3.57977
TRINITY_DN12643_c0_g1_i1	Mitochondrial 60S ribosomal protein L7/L12	-4.24788
TRINITY_DN8627_c0_g1_i1	Ribosomal protein S24	-4.06992
TRINITY_DN30444_c0_g1_i1	Mitochondrial ribosomal protein S12	-3.91838
TRINITY_DN18794_c0_g2_i1	39S ribosomal protein L47	-3.69448
TRINITY_DN5318_c0_g1_i1	28S ribosomal protein S35, mitochondrial	-3.39707
TRINITY_DN29568_c0_g1_i1	Probable 28S ribosomal protein S16, mitochondrial	-3.30541
TRINITY_DN17863_c0_g1_i1	Ribosomal protein L34a	-3.25999
TRINITY_DN14952_c0_g2_i1	60S ribosomal protein L22 isoform X2	-3.25857
TRINITY_DN18581_c0_g2_i1	Ribosomal protein L30p/L7e	-3.25687
TRINITY_DN19232_c0_g2_i1	Ribosomal protein L18a	-3.24646
TRINITY_DN18559_c0_g2_i1	60S ribosomal protein L23a	-3.18062
TRINITY_DN10425_c0_g2_i1	40S ribosomal protein S24-like	-3.16079
TRINITY_DN13972_c0_g2_i1	Ribosomal protein L31e	-3.13938
TRINITY_DN31754_c0_g1_i1	Ribosomal protein S7	-3.12216
TRINITY_DN30558_c0_g1_i1	40S ribosomal protein S15a	-3.09506
TRINITY_DN21928_c0_g1_i1	Mitochondrial ribosomal protein l11	-3.04571
TRINITY_DN19343_c0_g2_i1	Ribosomal protein, L4/L1 family	-3.0024
TRINITY_DN5912_c0_g1_i1	60S ribosomal protein L13	-3.00237
TRINITY_DN18933_c0_g2_i1	Ribosomal protein LP1	-3.00067
TRINITY_DN12918_c0_g1_i1	60S ribosomal protein L35-like	-2.96931
TRINITY_DN27249_c0_g2_i1	60S ribosomal protein L18	-2.96131
TRINITY_DN8569_c0_g1_i1	40S ribosomal protein S4	-2.95978
TRINITY_DN14661_c0_g2_i1	60S ribosomal protein L19 isoform X2	-2.95152
TRINITY_DN4105_c0_g1_i1	Ribosomal protein L35A	-2.94385
TRINITY_DN19805_c0_g1_i1	40S ribosomal protein S10	-2.94267
TRINITY_DN19439_c0_g1_i2	28S ribosomal protein S5 mitochondrial	-2.929
TRINITY_DN9147_c0_g1_i1	Ribosomal protein L11, RNA binding domain protein	-2.92863
TRINITY_DN12322_c0_g2_i1	Ribosomal protein S12	-2.90243
TRINITY_DN10372_c0_g1_i1	60S ribosomal protein L14-like	-2.9023
TRINITY_DN7656_c0_g1_i1	60S ribosomal protein L27-like	-2.90057
TRINITY_DN22713_c0_g2_i1	Mitochondrial ribosomal protein l23	-2.89479
TRINITY_DN20816_c0_g1_i1	60S ribosomal protein L26	-2.89345
TRINITY_DN13306_c0_g1_i1	Ribosomal protein S27	-2.87646
TRINITY_DN18301_c0_g1_i1	60S ribosomal protein RPL24	-2.85232
TRINITY_DN17609_c0_g1_i1	Ribosomal protein S23	-2.84778
TRINITY_DN13877_c0_g2_i1	Ribosomal protein L10Ae	-2.83127
TRINITY_DN27410_c0_g3_i1	60S ribosomal protein L27a	-2.82523
TRINITY_DN12536_c0_g1_i1	40S ribosomal protein S18	-2.82097
TRINITY_DN19491_c0_g1_i1	Ribosomal protein L9	-2.80931
TRINITY_DN15446_c0_g1_i1	40S ribosomal protein S8	-2.80831
TRINITY_DN15856_c0_g2_i1	Putative ribosomal protein L5	-2.79695
TRINITY_DN17364_c0_g1_i1	40S ribosomal protein S26	-2.77259
TRINITY_DN19032_c0_g1_i1	Putative 60s ribosomal protein L21	-2.75052
TRINITY_DN15291_c0_g1_i1	60S ribosomal protein	-2.73195
TRINITY_DN16046_c0_g2_i1	60S ribosomal protein L7a	-2.6946
TRINITY_DN15546_c0_g2_i1	60S ribosomal protein L13a	-2.64393
TRINITY_DN19058_c0_g2_i1	40S ribosomal protein S3	-2.61866
TRINITY_DN29700_c0_g1_i1	Ribosomal protein S15	-2.58114
TRINITY_DN18418_c0_g2_i1	Ribosomal protein S19e	-2.50581
TRINITY_DN16879_c0_g1_i1	40S ribosomal protein S5	-2.4838
TRINITY_DN14752_c0_g1_i1	Large subunit ribosomal protein 23	-2.29565
