# Supplementary material for: Djhsp60 Is Required for Planarian Regeneration and Homeostasis
Source: Biomolecules. 2022 Jun 9;12(6):808. doi: 10.3390/biom12060808 (PMC9221281; doi:10.3390/biom12060808)
Supplement: Supplementary file 1 [file biomolecules-12-00808-s001.zip › Supplementary File 4 Neoblasts-related transcripts.xlsx]

## Sheet: Sheet1
Gene_id	NR id	NR annotation	log2FoldChange
Neoblast-expressed genes
TRINITY_DN17489_c0_g1_i1	BAI67938.1	DjPiwiA	-3.09755
TRINITY_DN27464_c0_g1_i2	CAI26303.1	Piwi homologue	-3.09046
TRINITY_DN24939_c0_g1_i1	BAI67939.1	DjPiwiB	-2.89429
TRINITY_DN23197_c0_g1_i1	BAI67940.1	DjPiwiC	-2.82751
TRINITY_DN9953_c0_g1_i1	BAD89370.1	Proliferating cell nuclear antigen (PCNA)	-4.04516
TRINITY_DN27074_c0_g1_i1	CAC36296.1	MCM2 protein	-3.155
TRINITY_DN26444_c0_g1_i2	ADF47451.1	Vasa-like protein	-2.64957
TRINITY_DN26372_c0_g2_i1	AKG62100.1	Cell division cycle and apoptosis regulator protein 1 (CCAR1)	-2.71006
TRINITY_DN28049_c0_g1_i4	PAA86263.1	Protein argonaute-2	-2.9317
TRINITY_DN21801_c0_g1_i1	AFJ24744.1	RRM2-like protein	-2.91648
TRINITY_DN23293_c0_g2_i1	XP_012798655.1	PTEN	-5.81651
TRINITY_DN15518_c0_g1_i1	CCD58943.1	DEAD box ATP-dependent RNA helicase	-3.27584
TRINITY_DN25930_c0_g2_i2	PIS86254.1	DEAD/DEAH box helicase	-2.99382
TRINITY_DN26819_c0_g1_i1	BAA34993.1	DjVLGA	-2.86415
TRINITY_DN25836_c0_g1_i1	GAA35808.2	minichromosome maintenance protein 4	-2.61808
TRINITY_DN17685_c0_g1_i1	ACN54319.1	tudor domain containing 1	-3.01294
TRINITY_DN26929_c0_g2_i1	CAR66235.1	mortalin-like protein [Dugesia japonica]	-2.72681
TRINITY_DN22464_c0_g2_i1	CAR66202.1	retinoblastoma-associated proteins 46/48 [Dugesia japonica]	-2.44814
TRINITY_DN7551_c0_g1_i1	XP_022256616.1	acidic leucine-rich nuclear phosphoprotein 32 family member B-like isoform X3	-3.39254
TRINITY_DN19969_c0_g2_i1	AHF45924.1	prohibitin 2 [Dugesia japonica]	-3.05257
TRINITY_DN27841_c0_g3_i1	XP_025104072.1	HECT E3 ligases	-2.4641
