# Supplementary material for: Djhsp60 Is Required for Planarian Regeneration and Homeostasis
Source: Biomolecules. 2022 Jun 9;12(6):808. doi: 10.3390/biom12060808 (PMC9221281; doi:10.3390/biom12060808)
Supplement: Supplementary file 1 [file biomolecules-12-00808-s001.zip › Supplementary File 5 Transcripts related to energy metabolism.xlsx]

## Sheet: Sheet1
Electron transport chain related transcripts
Gene_id	log2FoldChange	NR annotation	KEGG gene name
TRINITY_DN15189_c0_g2_i1	-4.14954	NADH dehydrogenase [ubiquinone] iron-sulfur protein 7, mitochondrial	NDUFS7	I
TRINITY_DN17711_c0_g3_i1	-4.0263	NADH dehydrogenase [ubiquinone] iron-sulfur protein 8,mitochondrial	NDUFS8	I
TRINITY_DN22296_c0_g1_i1	-3.70487	NADH dehydrogenase [ubiquinone] iron-sulfur protein 7, mitochondrial	NDUFS7	I
TRINITY_DN25463_c0_g1_i1	-3.48588	NADH dehydrogenase [ubiquinone] 1 alpha subcomplex subunit 9, mitochondrial	NDUFA9	I
TRINITY_DN2007_c0_g1_i1	-3.45998	NADH dehydrogenase subunit 5,mitochondrial	ND5	I
TRINITY_DN12824_c0_g2_i1	-3.37321	NADH dehydrogenase subunit 1 ,mitochondrial	ND1	I
TRINITY_DN28533_c0_g1_i1	-3.30159	NADH dehydrogenase subunit 6,mitochondrial		I
TRINITY_DN17541_c0_g1_i1	-3.29815	NADH dehydrogenase [ubiquinone] iron-sulfur protein 4,mitochondrial	NDUFS4	I
TRINITY_DN11507_c1_g1_i1	-3.27475	NADH dehydrogenase (ubiquinone) 1 alpha	NDUFA7	I
TRINITY_DN12067_c0_g1_i1	-3.17018	NADH dehydrogenase [ubiquinone] 1 alpha subcomplex subunit 12	NDUFA12	I
TRINITY_DN15206_c1_g1_i1	-3.15046	NADH dehydrogenase [ubiquinone] 1 alpha subcomplex subunit 5-like	NDUFA5	I
TRINITY_DN15204_c0_g1_i1	-3.0579	NADH dehydrogenase [ubiquinone] 1 beta subcomplex subunit 5, mitochondrial	NDUFB5	I
TRINITY_DN11632_c0_g1_i1	-2.85669	NADH dehydrogenase [ubiquinone] 1 alpha subcomplex subunit 10, mitochondrial	NDUFA10	I
TRINITY_DN12018_c0_g1_i1	-2.85242	NADH dehydrogenase [ubiquinone] 1 beta subcomplex subunit 8, mitochondrial	NDUFB8	I
TRINITY_DN14212_c0_g1_i1	-2.75652	NADH dehydrogenase [ubiquinone] 1 beta subcomplex subunit 10	NDUFB10	I
TRINITY_DN2467_c0_g1_i1	-2.72262	NADH dehydrogenase [ubiquinone] 1 beta subcomplex subunit 3	NDUFB3	I
TRINITY_DN33183_c0_g1_i1	-2.68694	NADH dehydrogenase [ubiquinone] 1 beta subcomplex subunit 7	NDUFB7	I
TRINITY_DN25567_c0_g2_i1	-3.22531	succinate dehydrogenase (ubiquinone) flavoprotein subunit, mitochondrial	SDHA, SDH1	II
TRINITY_DN15001_c0_g1_i1	-2.79198	Succinate dehydrogenase cytochrome b560 subunit, mitochondrial	SDHC, SDH3	II
TRINITY_DN15581_c0_g1_i1	-2.61275	Succinate dehydrogenase [ubiquinone] cytochrome b small subunit, mitochondrial	SDHD, SDH4	II
TRINITY_DN21214_c0_g3_i1	-3.99036	Cytochrome b5 type B		III
TRINITY_DN2754_c0_g1_i1	-3.76671	Cytochrome b, mitochondrial	mt-Cytb	III
TRINITY_DN12901_c0_g1_i1	-3.10172	Cytochrome b-c1 complex subunit 7	QCR7, UQCRB	III
TRINITY_DN13222_c0_g1_i1	-2.93244	Cytochrome b5		III
TRINITY_DN20313_c0_g2_i1	-2.7871	Cytochrome b-c1 complex subunit Rieske, mitochondrial	UQCRFS1	III
TRINITY_DN25208_c0_g2_i1	-2.67915	Cytochrome b-c1 complex subunit 2, mitochondrial	QCR2, UQCRC2	III
TRINITY_DN1468_c0_g1_i1	-4.01766	Cytochrome c oxidase subunit III, mitochondrion	COX3	IV
TRINITY_DN30079_c0_g1_i1	-3.28966	Cytochrome c oxidase subunit II, mitochondrion	COX2	IV
TRINITY_DN10562_c0_g1_i1	-3.24049	Cytochrome c oxidase subunit 4 isoform 1, mitochondrial	COX4	IV
TRINITY_DN18732_c0_g1_i1	-3.08012	Cytochrome c oxidase subunit 5b	COX5B	IV
TRINITY_DN2380_c0_g1_i1	-3.01329	Cytochrome c oxidase subunit 5A, mitochondrial	COX5A	IV
TRINITY_DN31378_c0_g1_i1	-2.98718	Cytochrome c oxidase subunit 1,mitochondrial	COX1	IV
TRINITY_DN30940_c0_g1_i1	-2.82019	Cytochrome c oxidase subunit 6B	COX6B	IV
TRINITY_DN12391_c0_g1_i1	-2.44621	Cytochrome c oxidase subunit I, mitochondrion	COX1	IV
TRINITY_DN29821_c0_g1_i1	-3.75718	ATP synthase subunit 6, mitochondrion	ATP6	V
TRINITY_DN14476_c0_g2_i1	-3.55504	Mitochondrial ATP synthase subunit 9	ATP9	V
TRINITY_DN15875_c0_g1_i1	-3.37509	ATP synthase subunit O, mitochondrial	ATPeF0O	V
TRINITY_DN3997_c0_g1_i1	-2.9979	ATP synthase subunit g, mitochondrial	ATPeFG	V
TRINITY_DN22094_c0_g2_i1	-2.97436	ATP synthase subunit gamma, mitochondrial	ATPeF1G	V
TRINITY_DN8352_c1_g1_i1	-2.96134	Putative ATP synthase subunit f, mitochondrial	ATPeF0F	V
TRINITY_DN2644_c0_g1_i1	-2.81697	ATP synthase subunit b, mitochondrial	ATPeF0B	V
TCA Cycle
Gene_id	log2FoldChange	NR annotation
TRINITY_DN15001_c0_g1_i1	-2.79198	Succinate dehydrogenase cytochrome b560 subunit
TRINITY_DN15581_c0_g1_i1	-2.61275	Succinate dehydrogenase [ubiquinone] cytochrome b small subunit
TRINITY_DN18201_c0_g2_i1	-2.69525	Succinate--CoA ligase [ADP/GDP-forming] subunit alpha
TRINITY_DN19807_c0_g2_i1	-2.90184	Isocitrate dehydrogenase
TRINITY_DN23754_c0_g1_i1	-2.94443	Pyruvate dehydrogenase protein X component
TRINITY_DN23972_c0_g3_i1	-3.41457	Dihydrolipoyllysine-residue succinyltransferase component of 2-oxoglutarate dehydrogenase complex
TRINITY_DN25118_c0_g1_i1	-3.02109	Fumarate hydratase
TRINITY_DN25139_c0_g2_i1	-2.88651	Succinyl-CoA ligase [ADP-forming] subunit beta
TRINITY_DN25567_c0_g2_i1	-3.22531	Succinate dehydrogenase [ubiquinone] flavoprotein subunit
TRINITY_DN25953_c0_g2_i2	-2.96235	Dihydrolipoyllysine-residue acetyltransferase component of pyruvate dehydrogenase complex
TRINITY_DN26190_c0_g2_i1	-2.7178	Probable aconitate hydratase
Glycolysis / Gluconeogenesis
Gene_id	log2FoldChange	NR annotation
TRINITY_DN20015_c0_g1_i1	-2.83317	Phosphoglycerate kinase
TRINITY_DN20297_c0_g1_i1	-2.96648	Aldose 1-epimerase
TRINITY_DN21451_c0_g2_i1	down	Multiple inositol polyphosphate phosphatase 1
TRINITY_DN21695_c0_g1_i1	-2.86945	Fructose-1,6-bisphosphatase
TRINITY_DN23754_c0_g1_i1	-2.94443	Pyruvate dehydrogenase protein X component
TRINITY_DN24735_c0_g2_i1	-2.69311	Phosphoglucomutase-1
TRINITY_DN24791_c0_g1_i3	-3.49808	Alpha-aminoadipic semialdehyde dehydrogenase
TRINITY_DN24931_c0_g2_i1	-3.21082	Pyruvate kinase
TRINITY_DN24985_c0_g2_i1	-2.94173	Aldehyde dehydrogenase
TRINITY_DN25753_c0_g1_i2	-2.87173	ATP-dependent 6-phosphofructokinase
TRINITY_DN25953_c0_g2_i2	-2.96235	Dihydrolipoyllysine-residue acetyltransferase
Pentose phosphate pathway
Gene_id	log2FoldChange	NR annotation
TRINITY_DN16279_c0_g3_i1	down	Ribose-5-phosphate isomerase
TRINITY_DN21695_c0_g1_i1	-2.86945	Fructose-1,6-bisphosphatase 1
TRINITY_DN24735_c0_g2_i1	-2.69311	Phosphoglucomutase-1
TRINITY_DN25753_c0_g1_i2	-2.87173	ATP-dependent 6-phosphofructokinase
TRINITY_DN28031_c0_g3_i2	-3.22958	Transketolase
TRINITY_DN28031_c0_g4_i1	-2.91359	Transketolase
TRINITY_DN6115_c0_g1_i1	down	Ribokinase
