# Supplementary material for: Djhsp60 Is Required for Planarian Regeneration and Homeostasis
Source: Biomolecules. 2022 Jun 9;12(6):808. doi: 10.3390/biom12060808 (PMC9221281; doi:10.3390/biom12060808)
Supplement: Supplementary file 1 [file biomolecules-12-00808-s001.zip › Supplementary File 6 Down-regulation of intestine-enriched transcripts.xlsx]

## Sheet: S1A. 1844 Intestine-enriched
geneID	ID_used_in_paper	uniprot_id_human	uniprot_desc_human	log2FoldChange（Blast in RNAi-Djhsp60 data）
dd_Smed_v6_1_0_1	novel	NA	NA
dd_Smed_v6_10_1_1	zgc:172053	COLEC10	Collectin-10	-3.87509
dd_Smed_v6_100_0_1	novel	NA	NA
dd_Smed_v6_10002_0_1	NA	GNPTG	N-acetylglucosamine-1-phosphotransferase subunit gamma
dd_Smed_v6_1002_0_1	NA	SORD	Sorbitol dehydrogenase
dd_Smed_v6_10025_0_1	NA	NA	NA
dd_Smed_v6_10035_0_1	NA	NA	NA
dd_Smed_v6_10043_0_1	NA	NA	NA
dd_Smed_v6_10051_0_1	NA	STRA6	Stimulated by retinoic acid gene 6 protein homolog
dd_Smed_v6_10059_0_1	NA	NA	NA
dd_Smed_v6_10070_0_1	NA	ARHGAP26	Rho GTPase-activating protein 26	-2.55784
dd_Smed_v6_1008_0_1	NA	RNASET2	Ribonuclease T2	-2.61694
dd_Smed_v6_1009_0_1	NA	LIN7B	Protein lin-7 homolog B	-2.75654
dd_Smed_v6_1009_1_1	NA	SLC8B1	Sodium/potassium/calcium exchanger 6, mitochondrial
dd_Smed_v6_101_0_1	eppin	EPPIN	Eppin
dd_Smed_v6_10103_0_1	RREB2	RREB1	Ras-responsive element-binding protein 1
dd_Smed_v6_10130_0_1	NA	GRM3	Metabotropic glutamate receptor 3
dd_Smed_v6_10160_0_1	NA	SLC39A1	Zinc transporter ZIP1	-2.53042
dd_Smed_v6_10167_0_1	NA	STXBP2	Syntaxin-binding protein 2
dd_Smed_v6_10170_0_1	NA	NA	NA
dd_Smed_v6_10182_0_1	NA	PGAP2	Post-GPI attachment to proteins factor 2
dd_Smed_v6_1019_0_1	NA	SYNJ1	Synaptojanin-1	-2.80074
dd_Smed_v6_1020_0_1	NA	PHKG1	Phosphorylase b kinase gamma catalytic chain, skeletal muscle/heart isoform
dd_Smed_v6_1022_0_1	NA	NA	NA
dd_Smed_v6_10226_0_1	NA	NAT8B	Putative N-acetyltransferase 8B
dd_Smed_v6_10241_0_1	CIB2	CIB2	Calcium and integrin-binding family member 2
dd_Smed_v6_10243_0_1	NA	NA	NA
dd_Smed_v6_10257_0_1	NA	TCAF2	TRPM8 channel-associated factor 2	-6.16639
dd_Smed_v6_1026_0_1	NA	ACSBG2	Long-chain-fatty-acid--CoA ligase ACSBG2	-2.72337
dd_Smed_v6_10262_0_1	NA	TMEM56	Transmembrane protein 56	-5.40042
dd_Smed_v6_10288_0_1	NA	PLEKHG6	Pleckstrin homology domain-containing family G member 6
dd_Smed_v6_1029_1_1	NA	NA	NA
dd_Smed_v6_10310_0_1	NA	PISD	Phosphatidylserine decarboxylase proenzyme, mitochondrial	-3.092
dd_Smed_v6_10355_0_1	NA	GSTO1	Glutathione S-transferase omega-1	-2.72713
dd_Smed_v6_10356_0_1	NA	NA	NA
dd_Smed_v6_10359_0_1	NA	NA	NA
dd_Smed_v6_10364_0_1	NA	CBR4	Carbonyl reductase family member 4
dd_Smed_v6_1037_0_1	NA	RAB32	Ras-related protein Rab-32	-2.95365
dd_Smed_v6_10374_0_1	sbno2a	SBNO1	Protein strawberry notch homolog 1	-3.10717
dd_Smed_v6_10382_0_1	NA	NA	NA
dd_Smed_v6_10395_0_1	NA	NA	NA
dd_Smed_v6_10397_0_1	NA	PAQR3	Progestin and adipoQ receptor family member 3
dd_Smed_v6_10413_0_1	NA	NA	NA
dd_Smed_v6_1045_0_1	NA	EEF1B2	Elongation factor 1-beta	-2.79583
dd_Smed_v6_10474_0_1	NA	WDR59	GATOR complex protein WDR59
dd_Smed_v6_1048_0_1	NA	SLC37A2	Glucose-6-phosphate exchanger SLC37A2
dd_Smed_v6_10485_0_1	NA	TRPM2	Transient receptor potential cation channel subfamily M member 2	down
dd_Smed_v6_10493_0_1	NA	NA	NA
dd_Smed_v6_10499_0_1	NA	EGFR	Receptor protein-tyrosine kinase
dd_Smed_v6_1050_0_1	NA	RAC2	Ras-related C3 botulinum toxin substrate 2
dd_Smed_v6_10529_0_1	NA	ELOVL4	Elongation of very long chain fatty acids protein 4	-4.29945
dd_Smed_v6_1053_0_1	NA	NA	NA
dd_Smed_v6_10582_0_1	NA	RIN2	Ras and Rab interactor 2
dd_Smed_v6_10591_0_1	NA	LOXL2	Lysyl oxidase homolog 2
dd_Smed_v6_10595_0_1	NA	SLC47A2	Multidrug and toxin extrusion protein 2	-5.59215
dd_Smed_v6_1060_0_1	NA	ALDH18A1	Delta-1-pyrroline-5-carboxylate synthase
dd_Smed_v6_10607_0_1	NA	NA	NA
dd_Smed_v6_1062_0_1	gaa	GAA	Lysosomal alpha-glucosidase
dd_Smed_v6_1065_0_1	NA	CLINT1	Clathrin interactor 1
dd_Smed_v6_10656_0_1	NA	SLC16A9	Monocarboxylate transporter 9	down
dd_Smed_v6_10661_0_1	NA	NA	NA
dd_Smed_v6_10667_0_1	NA	PPAT	Amidophosphoribosyltransferase
dd_Smed_v6_1067_0_1	atp6ap2	ATP6AP2	Renin receptor
dd_Smed_v6_1068_0_1	NA	NA	NA
dd_Smed_v6_10699_0_1	NA	PEX3	Peroxisomal biogenesis factor 3	-3.81586
dd_Smed_v6_10724_0_1	NA	MFSD8	Major facilitator superfamily domain-containing protein 8	-5.14469
dd_Smed_v6_10744_0_1	NA	PM20D2	Peptidase M20 domain-containing protein 2	-5.08085
dd_Smed_v6_10758_0_1	NA	WDR41	WD repeat-containing protein 41	-6.54324
dd_Smed_v6_1079_0_1	NA	TMEM55A	Type 2 phosphatidylinositol 4,5-bisphosphate 4-phosphatase
dd_Smed_v6_10829_0_1	NA	NA	NA
dd_Smed_v6_10855_0_1	NA	NA	NA
dd_Smed_v6_10866_0_1	NA	KYNU	Kynureninase
dd_Smed_v6_1088_0_1	NA	TGFBI	Transforming growth factor-beta-induced protein ig-h3
dd_Smed_v6_1090_0_1	NA	NA	NA
dd_Smed_v6_10910_0_1	NA	NA	NA
dd_Smed_v6_10915_0_1	NA	NA	NA
dd_Smed_v6_10917_0_1	NA	TRAF6	TNF receptor-associated factor 6	-4.9483
dd_Smed_v6_10923_0_1	NA	NA	NA
dd_Smed_v6_1093_0_1	NA	SETMAR	Histone-lysine N-methyltransferase SETMAR	-5.67015
dd_Smed_v6_10959_0_1	NA	NA	NA
dd_Smed_v6_10973_0_1	NA	NA	NA
dd_Smed_v6_10981_0_1	NA	NA	NA
dd_Smed_v6_11_0_1	NA	NA	NA
dd_Smed_v6_11025_0_1	NA	PXMP4	Peroxisomal membrane protein 4
dd_Smed_v6_11031_0_1	NA	NA	NA
dd_Smed_v6_11047_0_1	NA	NA	NA
dd_Smed_v6_11065_0_1	NA	NA	NA
dd_Smed_v6_1107_0_1	NA	UBA1	Ubiquitin-like modifier-activating enzyme 1	-3.13714
dd_Smed_v6_1109_0_1	NA	KY	Kyphoscoliosis peptidase
dd_Smed_v6_11093_0_1	NA	NA	NA
dd_Smed_v6_11109_0_1	NA	NA	NA
dd_Smed_v6_11118_0_1	znf281	ZNF281	Zinc finger protein 281	-3.15978
dd_Smed_v6_11197_0_1	NA	PLPP4	Phospholipid phosphatase 4	-4.68526
dd_Smed_v6_1120_0_1	NA	NA	NA
dd_Smed_v6_11203_0_1	NA	NA	NA
dd_Smed_v6_1122_0_1	NA	SPTBN1	Spectrin beta chain, non-erythrocytic 1
dd_Smed_v6_1123_0_1	NA	DPP7	Dipeptidyl peptidase 2	-2.57371
dd_Smed_v6_1124_0_1	NA	NA	NA
dd_Smed_v6_11251_0_1	NA	DHDH	Trans-1,2-dihydrobenzene-1,2-diol dehydrogenase
dd_Smed_v6_11252_0_1	NA	KANK1	KN motif and ankyrin repeat domain-containing protein 1
dd_Smed_v6_1127_0_1	NA	HEL-S-182mP	Glycine N-methyltransferase
dd_Smed_v6_11287_0_1	NA	CALB2	Calretinin
dd_Smed_v6_11295_1_1	NA	AURKC	Aurora kinase C
dd_Smed_v6_1130_0_1	NA	SERINC3	Serine incorporator 3
dd_Smed_v6_1133_0_1	NA	ATG12	Ubiquitin-like protein ATG12
dd_Smed_v6_11330_0_1	slc10a2	SLC10A2	Ileal sodium/bile acid cotransporter	down
dd_Smed_v6_1137_0_1	NA	CYLD	Ubiquitin carboxyl-terminal hydrolase CYLD
dd_Smed_v6_11404_0_1	NA	BNIP1	Vesicle transport protein SEC20
dd_Smed_v6_11419_0_1	NA	NA	NA
dd_Smed_v6_11420_0_1	NA	NA	NA
dd_Smed_v6_1144_0_1	NA	TNXB	Tenascin-X
dd_Smed_v6_11452_0_1	NA	LOXL2	Lysyl oxidase homolog 2
dd_Smed_v6_11479_0_1	NA	NA	NA
dd_Smed_v6_1148_0_1	NA	C12orf10	Chromosome 12 open reading frame 10
dd_Smed_v6_115_0_1	novel	NA	NA
dd_Smed_v6_1150_0_1	NA	MINOS1	MICOS complex subunit MIC10
dd_Smed_v6_11511_0_1	NA	NA	NA
dd_Smed_v6_11532_0_1	NA	NA	NA
dd_Smed_v6_1156_0_1	NA	VMP1	Vacuole membrane protein 1
dd_Smed_v6_1158_0_1	NA	CHMP5	Charged multivesicular body protein 5	-3.01409
dd_Smed_v6_11586_0_1	NA	SLC39A13	Zinc transporter ZIP13
dd_Smed_v6_1159_0_1	slc22a6	SLC22A6	Solute carrier family 22 member 6
dd_Smed_v6_1162_0_1	NA	NA	NA
dd_Smed_v6_1163_0_1	NA	TRAF6	TNF receptor-associated factor 6	-4.1003
dd_Smed_v6_11636_0_1	NA	NA	NA
dd_Smed_v6_11644_0_1	NA	IQSEC1	IQ motif and SEC7 domain-containing protein 1	-5.39798
dd_Smed_v6_11648_0_1	NA	NA	NA
dd_Smed_v6_1165_0_1	NA	CAPZB	F-actin-capping protein subunit beta	-2.9278
dd_Smed_v6_11653_0_1	NA	NELL1	Protein kinase C-binding protein NELL1
dd_Smed_v6_11657_0_1	NA	ISLR	Immunoglobulin superfamily containing leucine-rich repeat protein
dd_Smed_v6_11660_0_1	NA	ATXN1	Ataxin-1
dd_Smed_v6_1167_0_1	NA	CASP7	Caspase-7
dd_Smed_v6_11686_0_1	NA	TMC5	Transmembrane channel-like protein 5
dd_Smed_v6_11707_0_1	NA	NA	NA
dd_Smed_v6_1171_0_1	NA	SLC13A3	Solute carrier family 13 member 3
dd_Smed_v6_11714_0_1	NA	NR1I3	Nuclear receptor subfamily 1 group I member 3
dd_Smed_v6_11730_0_1	NA	SLC52A3	Solute carrier family 52, riboflavin transporter, member 3
dd_Smed_v6_11741_0_1	NA	B3GALNT1	UDP-GalNAc:beta-1,3-N-acetylgalactosaminyltransferase 1
dd_Smed_v6_11763_0_1	NA	NA	NA
dd_Smed_v6_11765_0_1	NA	NA	NA
dd_Smed_v6_11807_0_1	sert	SLC6A19	Sodium-dependent neutral amino acid transporter B(0)AT1
dd_Smed_v6_11818_0_1	NA	SLC15A4	Solute carrier family 15 member 4
dd_Smed_v6_11845_0_1	NA	NA	NA
dd_Smed_v6_11852_0_1	NA	NA	NA
dd_Smed_v6_11859_0_1	NA	NA	NA
dd_Smed_v6_11906_0_1	NA	CMA1	Chymase
dd_Smed_v6_11914_0_1	NA	SRD5A1	3-oxo-5-alpha-steroid 4-dehydrogenase 1
dd_Smed_v6_11936_0_1	NA	ARHGEF10	Rho guanine nucleotide exchange factor 10
dd_Smed_v6_11947_0_1	NA	NAGA	Alpha-N-acetylgalactosaminidase
dd_Smed_v6_1195_0_1	NA	SYNGR1	Synaptogyrin-1
dd_Smed_v6_11957_0_1	NA	PI16	Peptidase inhibitor 16	-2.69956
dd_Smed_v6_12010_0_1	lin-48	OVOL1	Putative transcription factor Ovo-like 1
dd_Smed_v6_12018_0_1	NA	SEMA4A	Semaphorin-4A	-2.97735
dd_Smed_v6_1204_0_1	NA	EIF4EBP2	Eukaryotic translation initiation factor 4E-binding protein 2	-3.18776
dd_Smed_v6_12088_0_1	NA	NA	NA
dd_Smed_v6_1212_0_1	NA	MAP3K3	Mitogen-activated protein kinase kinase kinase 3	-2.71356
dd_Smed_v6_1216_0_1	NA	NA	NA
dd_Smed_v6_12185_0_1	NA	NA	NA
dd_Smed_v6_12190_0_1	NA	TRAF3	TNF receptor-associated factor 3	-4.33976
dd_Smed_v6_122_0_1	NA	TENM2	Teneurin-2
dd_Smed_v6_122_1_1	lipa	LIPA	Lysosomal acid lipase/cholesteryl ester hydrolase	-3.71245
dd_Smed_v6_12219_0_1	helz2	HELZ2	Helicase with zinc finger domain 2
dd_Smed_v6_12262_0_1	NA	NOG	Noggin
dd_Smed_v6_12311_0_1	NA	SLC16A12	Monocarboxylate transporter 12	-4.71501
dd_Smed_v6_12313_0_1	NA	MDGA1	MAM domain-containing glycosylphosphatidylinositol anchor protein 1	-2.98245
dd_Smed_v6_12324_0_1	NA	NA	NA
dd_Smed_v6_1233_0_1	NA	MAST4	Microtubule-associated serine/threonine-protein kinase 4
dd_Smed_v6_12376_0_1	NA	TMC5	Transmembrane channel-like protein 5
dd_Smed_v6_1240_0_1	NA	NA	NA
dd_Smed_v6_12427_0_1	NA	TWNK	Twinkle protein, mitochondrial
dd_Smed_v6_1246_0_1	NA	NA	NA
dd_Smed_v6_12502_0_1	NA	NA	NA
dd_Smed_v6_1251_0_1	fhl3	FHL3	FHL3 protein
dd_Smed_v6_12511_1_1	NA	NA	NA
dd_Smed_v6_12523_0_1	NA	AFMID	Kynurenine formamidase
dd_Smed_v6_1255_0_1	NA	ATP6V1C1	V-type proton ATPase subunit C 1
dd_Smed_v6_12552_0_1	NA	NA	NA
dd_Smed_v6_12558_0_1	NA	TRAPPC9	Trafficking protein particle complex subunit 9	-5.55973
dd_Smed_v6_12585_0_1	NA	NA	NA
dd_Smed_v6_1261_0_1	NA	FTMT	Ferritin, mitochondrial
dd_Smed_v6_12626_0_1	NA	SLC35C1	GDP-fucose transporter 1
dd_Smed_v6_1266_0_1	NA	NA	NA
dd_Smed_v6_12678_0_1	NA	RBCK1	RanBP-type and C3HC4-type zinc finger-containing protein 1	-2.48193
dd_Smed_v6_12719_0_1	NA	NA	NA
dd_Smed_v6_12729_0_1	NA	NA	NA
dd_Smed_v6_12786_0_1	NA	NA	NA
dd_Smed_v6_12821_0_1	NA	SEC14L4	SEC14-like protein 4	-4.47881
dd_Smed_v6_12832_0_1	NA	BEST3	Bestrophin-3	-3.4833
dd_Smed_v6_12848_0_1	NA	NA	NA
dd_Smed_v6_1286_0_1	NA	MAP2K6	Dual specificity mitogen-activated protein kinase kinase 6
dd_Smed_v6_1287_0_1	NA	NA	NA
dd_Smed_v6_12870_0_1	NA	NA	NA
dd_Smed_v6_12877_0_1	NA	NA	NA
dd_Smed_v6_12890_0_1	NA	MAP3K13	Mitogen-activated protein kinase kinase kinase 13	-4.29458
dd_Smed_v6_12893_0_1	NA	FAM102A	Protein FAM102A
dd_Smed_v6_12910_0_1	NA	NA	NA
dd_Smed_v6_1294_0_1	NA	NA	NA
dd_Smed_v6_1296_0_1	NA	NA	NA
dd_Smed_v6_1297_0_1	NA	PEPD	Xaa-Pro dipeptidase	-2.91102
dd_Smed_v6_1298_0_1	NA	NA	NA
dd_Smed_v6_12983_0_1	NA	PRR5L	Proline-rich protein 5-like
dd_Smed_v6_12990_0_1	slc8a1	SLC8A1	Sodium/calcium exchanger 1	-6.01916
dd_Smed_v6_1300_0_1	NA	NA	NA
dd_Smed_v6_13035_0_1	NA	NA	NA
dd_Smed_v6_1306_0_1	NA	PLA2G15	Group XV phospholipase A2
dd_Smed_v6_1308_0_1	NA	TRAF2	TNF receptor-associated factor 2	-3.99512
dd_Smed_v6_131_0_1	novel	NA	NA
dd_Smed_v6_13101_0_1	NA	NA	NA
dd_Smed_v6_1311_0_1	NA	VAMP3	Vesicle-associated membrane protein 3
dd_Smed_v6_13139_0_1	NA	CTSS	Cathepsin S
dd_Smed_v6_1315_0_1	NA	ETFB	Electron transfer flavoprotein subunit beta	-3.38778
dd_Smed_v6_13164_0_1	NA	DHCR24	Delta(24)-sterol reductase
dd_Smed_v6_132_0_1	NA	NA	NA
dd_Smed_v6_1322_0_1	NA	MAPRE1	Microtubule-associated protein RP/EB family member 1	-2.76114
dd_Smed_v6_1325_0_1	zmym1	ZMYM1	Zinc finger MYM-type protein 1	-3.12395
dd_Smed_v6_13270_0_1	NA	RGR	RPE-retinal G protein-coupled receptor
dd_Smed_v6_1328_0_1	NA	NA	NA
dd_Smed_v6_13288_0_1	NA	DSTYK	Dual serine/threonine and tyrosine protein kinase	-3.62386
dd_Smed_v6_13292_0_1	NA	NID2	Nidogen-2
dd_Smed_v6_13315_0_1	NA	NA	NA
dd_Smed_v6_1333_0_1	cg10527	NA	NA
dd_Smed_v6_1334_0_1	NA	BPNT1	3'(2'),5'-bisphosphate nucleotidase 1
dd_Smed_v6_1335_0_1	NA	CHMP2A	Charged multivesicular body protein 2a
dd_Smed_v6_1339_0_1	NA	ALDH2	Aldehyde dehydrogenase, mitochondrial	-2.94173
dd_Smed_v6_1346_0_1	NA	HMBS	Porphobilinogen deaminase	-3.28415
dd_Smed_v6_13461_0_1	NA	NA	NA
dd_Smed_v6_1347_0_1	novel	NA	NA
dd_Smed_v6_1350_0_1	NA	NA	NA
dd_Smed_v6_13509_0_1	NA	HTR2A	5-hydroxytryptamine receptor 2A
dd_Smed_v6_1351_0_1	NA	PRCP	Lysosomal Pro-X carboxypeptidase
dd_Smed_v6_1354_0_1	NA	SNX3	Sorting nexin-3	-2.57085
dd_Smed_v6_1358_0_1	NA	COMMD5	COMM domain-containing protein 5
dd_Smed_v6_1362_0_1	NA	PRKAR2B	Protein kinase, cAMP-dependent, regulatory, type II, beta
dd_Smed_v6_1364_0_1	NA	UBQLN1	Ubiquilin-1	-2.81857
dd_Smed_v6_1365_0_1	NA	M6PR	Cation-dependent mannose-6-phosphate receptor	-5.4877
dd_Smed_v6_1369_0_1	NA	ATP6V1E1	ATPase, H+ transporting, lysosomal 31kDa, V1 subunit E isoform 1
dd_Smed_v6_13694_0_1	NA	NA	NA
dd_Smed_v6_13709_0_1	NA	NA	NA
dd_Smed_v6_1371_0_1	NA	DSTYK	Dual serine/threonine and tyrosine protein kinase	-3.62386
dd_Smed_v6_1373_1_1	NA	PDCD6IP	Programmed cell death 6-interacting protein	-2.75083
dd_Smed_v6_13739_0_1	NA	NA	NA
dd_Smed_v6_13810_0_1	NA	NA	NA
dd_Smed_v6_13811_0_1	NA	TRAF6	TNF receptor-associated factor 6	-4.1003
dd_Smed_v6_1388_0_1	NA	NA	NA
dd_Smed_v6_13906_1_1	NA	SRR	Serine racemase
dd_Smed_v6_1391_0_1	NA	ATP6V1D	V-type proton ATPase subunit D
dd_Smed_v6_1394_0_1	NA	NA	NA
dd_Smed_v6_1395_0_1	NA	RNF34	E3 ubiquitin-protein ligase RNF34	-3.68182
dd_Smed_v6_13970_0_1	NA	NA	NA
dd_Smed_v6_13997_0_1	NA	NA	NA
dd_Smed_v6_14_0_1	novel	NA	NA
dd_Smed_v6_1401_0_1	novel	NA	NA
dd_Smed_v6_14029_0_1	NA	MCPH1	Microcephalin
dd_Smed_v6_14059_0_1	NA	EIF4G1	Eukaryotic translation initiation factor 4 gamma 1	-3.64907
dd_Smed_v6_1406_0_1	novel	NA	NA
dd_Smed_v6_14070_0_1	NA	NA	NA
dd_Smed_v6_14096_0_1	NA	NA	NA
dd_Smed_v6_1411_0_1	NA	ACAA2	3-ketoacyl-CoA thiolase, mitochondrial
dd_Smed_v6_1412_0_1	cpa2	CPA2	Carboxypeptidase A2	-2.50914
dd_Smed_v6_14195_0_1	NA	NA	NA
dd_Smed_v6_14241_0_1	NA	NA	NA
dd_Smed_v6_14248_0_1	NA	NA	NA
dd_Smed_v6_14273_0_1	NA	NA	NA
dd_Smed_v6_1433_0_1	NA	VAPA	Vesicle-associated membrane protein-associated protein A	-2.95178
dd_Smed_v6_14332_0_1	NA	UBA52	Ubiquitin A-52 residue ribosomal protein fusion product 1
dd_Smed_v6_1439_0_1	NA	TRAF6	TNF receptor-associated factor 6	-2.81432
dd_Smed_v6_14400_0_1	NA	ARHGAP20	Rho GTPase-activating protein 20	-3.00076
dd_Smed_v6_1444_0_1	NA	WWP1	NEDD4-like E3 ubiquitin-protein ligase WWP1
dd_Smed_v6_1447_0_1	NA	PIEZO2	Piezo-type mechanosensitive ion channel component 2	down
dd_Smed_v6_1450_0_1	NA	RAP2C	Ras-related protein Rap-2c
dd_Smed_v6_1451_0_1	NA	NA	NA
dd_Smed_v6_1452_0_1	NA	ATP6V1H	V-type proton ATPase subunit H
dd_Smed_v6_1453_0_1	NA	ABHD4	Protein ABHD4
dd_Smed_v6_14544_0_1	NA	NA	NA
dd_Smed_v6_1455_0_1	zn72d	ZNF346	Zinc finger protein 346	-2.59565
dd_Smed_v6_1458_0_1	NA	ACADL	Long-chain specific acyl-CoA dehydrogenase, mitochondrial
dd_Smed_v6_14593_0_1	NA	NA	NA
dd_Smed_v6_14614_0_1	NA	TRAF6	TNF receptor-associated factor 6	-4.9483
dd_Smed_v6_1462_0_1	NA	SGTB	Small glutamine-rich tetratricopeptide repeat-containing protein beta
dd_Smed_v6_14623_0_1	NA	GRIN3A	Glutamate receptor ionotropic, NMDA 3A	-5.30975
dd_Smed_v6_1463_0_1	NA	PICALM	Phosphatidylinositol-binding clathrin assembly protein
dd_Smed_v6_1467_0_1	NA	EFHD1	EF-hand domain-containing protein D1	-4.40929
dd_Smed_v6_1471_0_1	NA	NA	NA
dd_Smed_v6_14777_0_1	NA	POTEKP	Putative beta-actin-like protein 3
dd_Smed_v6_1480_0_1	NA	APMAP	Adipocyte plasma membrane-associated protein	-3.13425
dd_Smed_v6_14816_0_1	NA	SPRED1	Sprouty-related, EVH1 domain-containing protein 1
dd_Smed_v6_14832_0_1	NA	TSTD1	Thiosulfate sulfurtransferase/rhodanese-like domain-containing protein 1
dd_Smed_v6_1488_0_1	NA	NA	NA
dd_Smed_v6_1491_0_1	NA	NA	NA
dd_Smed_v6_14927_0_1	NA	CYP2C18	Cytochrome P450 2C18
dd_Smed_v6_1493_0_1	NA	ALDH7A1	Alpha-aminoadipic semialdehyde dehydrogenase	-3.49808
dd_Smed_v6_1494_0_1	NA	ATP6V1E1	ATPase, H+ transporting, lysosomal 31kDa, V1 subunit E isoform 1
dd_Smed_v6_14969_0_1	NA	NA	NA
dd_Smed_v6_15025_0_1	NA	NA	NA
dd_Smed_v6_1504_0_1	NA	CHP1	Calcineurin B homologous protein 1
dd_Smed_v6_15049_0_1	NA	TRAF6	TNF receptor-associated factor 6	-4.1003
dd_Smed_v6_1505_0_1	NA	TGFBI	Transforming growth factor-beta-induced protein ig-h3
dd_Smed_v6_1513_0_1	NA	SLC31A1	High affinity copper uptake protein 1
dd_Smed_v6_15132_0_1	NA	NA	NA
dd_Smed_v6_1514_0_1	NA	CHMP2B	Charged multivesicular body protein 2b	-3.01409
dd_Smed_v6_1517_0_1	NA	GSTM4	Glutathione S-transferase Mu 4	-2.40902
dd_Smed_v6_15178_0_1	six7	SIX6	Homeobox protein SIX6
dd_Smed_v6_1518_0_1	NA	CLSTN1	Calsyntenin-1	-2.5961
dd_Smed_v6_1519_0_1	NA	HEL-S-5	Aminoacylase 1
dd_Smed_v6_15204_0_1	NA	HSPA8	HSPA8 protein
dd_Smed_v6_1522_0_1	NA	SH3KBP1	SH3 domain-containing kinase-binding protein 1
dd_Smed_v6_1523_0_1	pgrp-lb	PGLYRP3	Peptidoglycan recognition protein 3	-2.98748
dd_Smed_v6_15296_0_1	NA	RAPH1	Ras-associated and pleckstrin homology domains-containing protein 1
dd_Smed_v6_1531_0_1	NA	NA	NA
dd_Smed_v6_15390_0_1	NA	NA	NA
dd_Smed_v6_154_0_1	plin5	PLIN5	Perilipin-5
dd_Smed_v6_1542_0_1	NA	NA	NA
dd_Smed_v6_1544_0_1	scamp1	SCAMP1	Secretory carrier-associated membrane protein 1
dd_Smed_v6_1553_0_1	novel	NA	NA
dd_Smed_v6_15545_0_1	NA	NA	NA
dd_Smed_v6_1558_0_1	NA	NA	NA
dd_Smed_v6_1559_0_1	NA	BCAP31	B-cell receptor-associated protein 31	-2.78811
dd_Smed_v6_1562_0_1	NA	TMX1	Thioredoxin-related transmembrane protein 1	-3.7543
dd_Smed_v6_1563_0_1	NA	CLINT1	Clathrin interactor 1	-2.82551
dd_Smed_v6_1565_0_1	NA	LIPF	Gastric triacylglycerol lipase	-2.31373
dd_Smed_v6_1570_0_1	NA	NA	NA
dd_Smed_v6_1584_0_1	NA	UPB1	Beta-ureidopropionase
dd_Smed_v6_1585_0_1	cbs	CBS	Cystathionine beta-synthase	-2.9542
dd_Smed_v6_1587_0_1	NA	NA	NA
dd_Smed_v6_1589_0_1	NA	ATP6V1F	V-type proton ATPase subunit F	-3.5811
dd_Smed_v6_1593_1_1	NA	HADHB	Trifunctional enzyme subunit beta, mitochondrial	-2.72246
dd_Smed_v6_1595_0_1	NA	NA	NA
dd_Smed_v6_1599_0_1	NA	CORO1B	Coronin-1B	-2.15071
dd_Smed_v6_160_0_1	NA	DBI	Acyl-CoA-binding protein
dd_Smed_v6_16071_0_1	NA	NA	NA
dd_Smed_v6_162_0_1	NA	GRN	Granulins
dd_Smed_v6_1621_0_1	aldh8a1	ALDH8A1	Aldehyde dehydrogenase family 8 member A1	-3.49808
dd_Smed_v6_1622_0_1	NA	ATP6V0B	V-type proton ATPase 21 kDa proteolipid subunit	-2.84138
dd_Smed_v6_16234_0_1	NA	NA	NA
dd_Smed_v6_1625_0_1	NA	LIMA1	LIM domain and actin-binding protein 1	-2.76938
dd_Smed_v6_1626_0_1	NA	MYO1E	Unconventional myosin-Ie
dd_Smed_v6_16290_0_1	NA	-	P2X purinoceptor
dd_Smed_v6_1630_0_1	NA	STK24	Serine/threonine-protein kinase 24
dd_Smed_v6_1633_0_1	NA	SPTLC2	Serine palmitoyltransferase 2	-2.76112
dd_Smed_v6_1643_0_1	crn-7	DNASE2	Deoxyribonuclease-2-alpha
dd_Smed_v6_1644_0_1	NA	GALNT10	Polypeptide N-acetylgalactosaminyltransferase 10	-5.85519
dd_Smed_v6_16447_0_1	NA	NA	NA
dd_Smed_v6_1645_0_1	NA	CHMP1A	Charged multivesicular body protein 1a	-3.01409
dd_Smed_v6_16471_0_1	NA	NA	NA
dd_Smed_v6_1649_0_1	NA	SATL1	Spermidine/spermine N(1)-acetyltransferase-like protein 1
dd_Smed_v6_16506_0_1	NA	NA	NA
dd_Smed_v6_1655_0_1	uroc1	UROC1	Urocanate hydratase
dd_Smed_v6_1659_0_1	NA	NA	NA
dd_Smed_v6_16675_0_1	NA	NA	NA
dd_Smed_v6_1670_0_1	NA	NDE1	Nuclear distribution protein nudE homolog 1
dd_Smed_v6_16749_0_1	NA	CYP20A1	Cytochrome P450 20A1
dd_Smed_v6_1680_0_1	NA	ALDH3B1	Aldehyde dehydrogenase family 3 member B1
dd_Smed_v6_1694_0_1	hnf-4	HNF4G	Hepatocyte nuclear factor 4-gamma
dd_Smed_v6_17_0_1	NA	NA	NA
dd_Smed_v6_1701_0_1	NA	SNF8	Vacuolar-sorting protein SNF8	-3.29774
dd_Smed_v6_17049_0_1	NA	NA	NA
dd_Smed_v6_1705_0_1	NA	NA	NA
dd_Smed_v6_1708_0_1	NA	NA	NA
dd_Smed_v6_1709_0_1	NA	FBP1	Fructose-1,6-bisphosphatase 1	-2.86945
dd_Smed_v6_1714_0_1	NA	EVL	Ena/VASP-like protein
dd_Smed_v6_1726_0_1	cdase	ASAH2	Neutral ceramidase
dd_Smed_v6_1727_0_1	NA	VPS29	Vacuolar protein sorting-associated protein 29	-3.43477
dd_Smed_v6_1731_0_1	NA	SLC39A14	Zinc transporter ZIP14
dd_Smed_v6_17320_0_1	NA	NA	NA
dd_Smed_v6_1734_0_1	NA	HEL-S-8a	Epididymis secretory sperm binding protein Li 8a
dd_Smed_v6_1736_0_1	NA	NA	NA
dd_Smed_v6_1738_0_1	NA	SLC12A9	Solute carrier family 12 member 9	-3.35191
dd_Smed_v6_1739_0_1	NA	HEL-S-52	Epididymis secretory protein Li 52
dd_Smed_v6_1743_0_1	NA	HACD2	Very-long-chain (3R)-3-hydroxyacyl-CoA dehydratase 2	-3.9395
dd_Smed_v6_17442_0_1	NA	NA	NA
dd_Smed_v6_17481_0_1	NA	NA	NA
dd_Smed_v6_1754_0_1	NA	NA	NA
dd_Smed_v6_1757_0_1	NA	NA	NA
dd_Smed_v6_1758_0_1	NA	L2HGDH	L-2-hydroxyglutarate dehydrogenase, mitochondrial
dd_Smed_v6_17590_0_1	NA	NA	NA
dd_Smed_v6_1762_0_1	NA	CHMP6	Charged multivesicular body protein 6	-3.01409
dd_Smed_v6_1767_0_1	NA	BAK1	Bcl-2 homologous antagonist/killer	-3.75638
dd_Smed_v6_1768_0_1	NA	NA	NA
dd_Smed_v6_1769_0_1	NA	NA	NA
dd_Smed_v6_1773_0_1	NA	GNAI1	Guanine nucleotide-binding protein G(i) subunit alpha-1
dd_Smed_v6_1776_0_1	NA	ATPIF1	ATPase inhibitor, mitochondrial
dd_Smed_v6_1784_0_1	NA	ILVBL	Acetolactate synthase-like protein
dd_Smed_v6_1785_0_1	NA	NA	NA
dd_Smed_v6_17873_0_1	NA	NA	NA
dd_Smed_v6_1794_0_1	NA	COMTD1	Catechol O-methyltransferase domain-containing protein 1
dd_Smed_v6_1796_0_1	NA	RTN1	Reticulon-1
dd_Smed_v6_1798_0_1	NA	SYP	Synaptophysin
dd_Smed_v6_1799_0_1	NA	NA	NA
dd_Smed_v6_180_0_1	NA	UBE2L3	Ubiquitin-conjugating enzyme E2 L3	-2.85862
dd_Smed_v6_18010_0_1	NA	NA	NA
dd_Smed_v6_1802_0_1	NA	RBCK1	RanBP-type and C3HC4-type zinc finger-containing protein 1	-2.48193
dd_Smed_v6_18043_0_1	NA	NA	NA
dd_Smed_v6_18077_0_1	NA	B3GNT5	Lactosylceramide 1,3-N-acetyl-beta-D-glucosaminyltransferase
dd_Smed_v6_1808_0_1	NA	NA	NA
dd_Smed_v6_182_0_1	NA	NA	NA
dd_Smed_v6_18214_0_1	NA	NA	NA
dd_Smed_v6_1823_0_1	NA	SLC25A20	Mitochondrial carnitine/acylcarnitine carrier protein
dd_Smed_v6_1825_0_1	NA	LACTB2	Endoribonuclease LACTB2
dd_Smed_v6_1827_0_1	NA	NPTN	Neuroplastin
dd_Smed_v6_1829_0_1	NA	NA	NA
dd_Smed_v6_1830_0_1	NA	PARD6B	Partitioning defective 6 homolog beta
dd_Smed_v6_1835_0_1	NA	BRK1	Protein BRICK1
dd_Smed_v6_1836_0_1	NA	ATP6V1G2	V-type proton ATPase subunit G 2
dd_Smed_v6_184_0_1	NA	NA	NA
dd_Smed_v6_1840_0_1	NA	ATP6AP1	V-type proton ATPase subunit S1
dd_Smed_v6_1846_0_1	NA	KY	Kyphoscoliosis peptidase
dd_Smed_v6_185_0_1	NA	NA	NA
dd_Smed_v6_1850_0_1	NA	NA	NA
dd_Smed_v6_18502_0_1	NA	NA	NA
dd_Smed_v6_18520_0_1	NA	TRAF4	TNF receptor-associated factor 4	-3.46837
dd_Smed_v6_1856_0_1	NA	FAM49B	Protein FAM49B	-2.6892
dd_Smed_v6_1858_0_1	NA	MTHFD1	C-1-tetrahydrofolate synthase, cytoplasmic
dd_Smed_v6_1860_0_1	NA	NA	NA
dd_Smed_v6_1865_0_1	NA	C10orf11	Leucine-rich repeat-containing protein C10orf11
dd_Smed_v6_1874_0_1	NA	SLC17A5	Sialin	-2.69705
dd_Smed_v6_1884_1_1	NA	HGSNAT	Heparan-alpha-glucosaminide N-acetyltransferase	-3.84832
dd_Smed_v6_1889_0_1	NA	ETFA	Electron transfer flavoprotein subunit alpha, mitochondrial	-3.12677
dd_Smed_v6_1890_0_1	NA	NA	NA
dd_Smed_v6_1894_0_1	NA	PLD3	Phospholipase D3
dd_Smed_v6_1895_0_1	NA	RIDA	2-iminobutanoate/2-iminopropanoate deaminase
dd_Smed_v6_1896_0_1	NA	OAT	Ornithine aminotransferase, mitochondrial
dd_Smed_v6_1897_0_1	NA	NEK4	Serine/threonine-protein kinase Nek4
dd_Smed_v6_18975_0_1	NA	SLC16A4	Monocarboxylate transporter 5	down
dd_Smed_v6_19_0_1	novel	NA	NA
dd_Smed_v6_190_0_1	NA	EPPIN	Eppin
dd_Smed_v6_1904_0_1	NA	SLC37A3	Sugar phosphate exchanger 3	-3.10357
dd_Smed_v6_1915_0_1	NA	ATG3	Ubiquitin-like-conjugating enzyme ATG3
dd_Smed_v6_1916_0_1	NA	CHL1	Neural cell adhesion molecule L1-like protein
dd_Smed_v6_19217_0_1	NA	TRAF5	TNF receptor-associated factor 5	-2.81344
dd_Smed_v6_1923_0_1	NA	SMAD4	Mothers against decapentaplegic homolog	-5.88166
dd_Smed_v6_1924_1_1	NA	OSTM1	Osteopetrosis-associated transmembrane protein 1
dd_Smed_v6_1926_0_1	NA	PRSS12	Neurotrypsin	-2.92445
dd_Smed_v6_1934_0_1	NA	NEURL1B	E3 ubiquitin-protein ligase NEURL1B	-3.53344
dd_Smed_v6_1937_0_1	NA	TOLLIP	Toll-interacting protein	-3.06992
dd_Smed_v6_1938_0_1	NA	NA	NA
dd_Smed_v6_1939_0_1	NA	GCSH	Glycine cleavage system H protein	-3.24111
dd_Smed_v6_194_0_1	apob-2	MUC2	Mucin-2	-2.89702
dd_Smed_v6_1941_0_1	NA	NA	NA
dd_Smed_v6_19414_0_1	NA	-	Heat shock 70kDa protein 8 isoform 2 variant
dd_Smed_v6_1942_0_1	NA	MAN2B1	Lysosomal alpha-mannosidase	-3.2436
dd_Smed_v6_1961_0_1	NA	ARCN1	Coatomer subunit delta
dd_Smed_v6_1976_0_1	NA	ATP6V0D1	V-type proton ATPase subunit d 1	-3.1003
dd_Smed_v6_1977_0_1	NA	ELOVL4	Elongation of very long chain fatty acids protein 4	-4.29945
dd_Smed_v6_1978_0_1	NA	AP3B2	AP-3 complex subunit beta-2	-3.36736
dd_Smed_v6_1981_0_1	NA	ATP6V0E2	V-type proton ATPase subunit e 2	-3.1003
dd_Smed_v6_1984_0_1	NA	NA	NA
dd_Smed_v6_199_0_1	NA	NA	NA
dd_Smed_v6_1990_0_1	NA	CHN2	Beta-chimaerin
dd_Smed_v6_1999_0_1	NA	MEX3D	RNA-binding protein MEX3D
dd_Smed_v6_20_0_1	hpgds	HPGDS	Hematopoietic prostaglandin D synthase
dd_Smed_v6_2001_0_1	NA	UBB	Epididymis secretory protein Li 50
dd_Smed_v6_20012_0_1	NA	DAD1	Dolichyl-diphosphooligosaccharide--protein glycosyltransferase subunit DAD1
dd_Smed_v6_2002_0_1	NA	CPOX	Oxygen-dependent coproporphyrinogen-III oxidase, mitochondrial
dd_Smed_v6_2006_0_1	NA	IST1	IST1 homolog
dd_Smed_v6_2009_0_1	NA	ACSL5	Long-chain-fatty-acid--CoA ligase 5	-3.58296
dd_Smed_v6_2010_0_1	NA	NA	NA
dd_Smed_v6_2011_0_1	NA	EPHX3	Epoxide hydrolase 3
dd_Smed_v6_2012_0_1	NA	COMMD10	COMM domain-containing protein 10
dd_Smed_v6_20154_0_1	NA	DDHD1	Phospholipase DDHD1	-5.85519
dd_Smed_v6_2021_0_1	pi16	PI16	Peptidase inhibitor 16	-2.69956
dd_Smed_v6_2022_0_1	NA	LPCAT1	Lysophosphatidylcholine acyltransferase 1
dd_Smed_v6_2024_0_1	NA	IFI30	Gamma-interferon-inducible lysosomal thiol reductase
dd_Smed_v6_2028_0_1	NA	MAST4	Microtubule-associated serine/threonine-protein kinase 4
dd_Smed_v6_2030_0_1	NA	MAP3K3	Mitogen-activated protein kinase kinase kinase 3	-2.53596
dd_Smed_v6_2031_0_1	svep1	NOTCH3	Neurogenic locus notch homolog protein 3	-5.27022
dd_Smed_v6_2032_0_1	NA	EPB41L2	EPB41L2 protein
dd_Smed_v6_20353_0_1	NA	SLC32A1	Vesicular inhibitory amino acid transporter
dd_Smed_v6_2037_0_1	NA	DPYD	Dihydropyrimidine dehydrogenase [NADP(+)]
dd_Smed_v6_2041_0_1	NA	NA	NA
dd_Smed_v6_2042_0_1	NA	NA	NA
dd_Smed_v6_2044_0_1	NA	TPRG1L	Tumor protein p63-regulated gene 1-like protein
dd_Smed_v6_20482_0_1	NA	-	Heat shock 70kDa protein 8 isoform 2 variant
dd_Smed_v6_2053_0_1	NA	SLC35F6	Solute carrier family 35 member F6
dd_Smed_v6_2058_0_1	NA	RIPOR1	Rho family-interacting cell polarization regulator 1
dd_Smed_v6_2061_0_1	NA	NA	NA
dd_Smed_v6_20619_0_1	NA	SETMAR	Histone-lysine N-methyltransferase SETMAR	-5.67015
dd_Smed_v6_2062_0_1	NA	CMBL	Carboxymethylenebutenolidase homolog	-2.97674
dd_Smed_v6_2066_0_1	NA	LMAN2	Vesicular integral-membrane protein VIP36
dd_Smed_v6_2069_0_1	NA	NA	NA
dd_Smed_v6_20716_0_1	NA	NA	NA
dd_Smed_v6_2075_0_1	NA	PANK1	Pantothenate kinase 1
dd_Smed_v6_2076_0_1	NA	PGRMC2	Membrane-associated progesterone receptor component 2
dd_Smed_v6_2083_0_1	NA	CYP2A13	Cytochrome P450 2A13
dd_Smed_v6_2084_0_1	NA	BEST2	Bestrophin-2	-2.88704
dd_Smed_v6_2085_0_1	NA	TECR	Very-long-chain enoyl-CoA reductase
dd_Smed_v6_2087_0_1	NA	PISD	Phosphatidylserine decarboxylase proenzyme, mitochondrial	-2.58968
dd_Smed_v6_2095_0_1	NA	ENTPD4	Ectonucleoside triphosphate diphosphohydrolase 4	-3.45854
dd_Smed_v6_2096_0_1	NA	RDH13	Retinol dehydrogenase 13
dd_Smed_v6_2097_0_1	NA	NA	NA
dd_Smed_v6_2098_0_1	NA	CISD2	CDGSH iron-sulfur domain-containing protein 2	-2.92022
dd_Smed_v6_2099_0_1	NA	RAB4A	Ras-related protein Rab-4A	-2.95518
dd_Smed_v6_2104_0_1	NA	BIRC2	Baculoviral IAP repeat-containing protein 2	-3.70911
dd_Smed_v6_2106_0_1	NA	MAP2K6	Dual specificity mitogen-activated protein kinase kinase 6
dd_Smed_v6_2112_0_1	NA	USP4	Ubiquitin specific peptidase 4 (Proto-oncogene), isoform CRA_b
dd_Smed_v6_2115_0_1	NA	AGPS	Alkyldihydroxyacetonephosphate synthase, peroxisomal
dd_Smed_v6_212_0_1	NA	NA	NA
dd_Smed_v6_21242_0_1	NA	NA	NA
dd_Smed_v6_2127_0_1	NA	MPC1	Mitochondrial pyruvate carrier 1
dd_Smed_v6_2129_0_1	NA	STAM2	Signal transducing adapter molecule 2	-2.44857
dd_Smed_v6_2131_0_1	NA	NA	NA
dd_Smed_v6_2132_0_1	NA	NA	NA
dd_Smed_v6_2134_0_1	NA	KDM1B	Lysine-specific histone demethylase 1B
dd_Smed_v6_2137_0_1	NA	LAMTOR2	Ragulator complex protein LAMTOR2
dd_Smed_v6_2138_0_1	NA	BARD1	BRCA1 associated RING domain 1
dd_Smed_v6_214_0_1	NA	RPS29	40S ribosomal protein S29
dd_Smed_v6_214_1_1	gm2a	GM2A	Ganglioside GM2 activator
dd_Smed_v6_215_0_1	psap	PSAP	Prosaposin	-3.09927
dd_Smed_v6_2154_0_1	NA	ADSS	Adenylosuccinate synthetase isozyme 2
dd_Smed_v6_2160_0_1	NA	DNM1	Dynamin-1
dd_Smed_v6_2161_0_1	NA	GBE1	1,4-alpha-glucan-branching enzyme	-2.5619
dd_Smed_v6_2167_0_1	NA	RAP1B	Ras-related protein Rap-1b	-3.67353
dd_Smed_v6_2174_0_1	NA	NA	NA
dd_Smed_v6_2180_0_1	NA	PRKAR1B	cAMP-dependent protein kinase type I-beta regulatory subunit
dd_Smed_v6_2183_0_1	NA	DUSP22	Dual specificity protein phosphatase 22	-3.10504
dd_Smed_v6_2186_0_1	NA	EXOC6B	Exocyst complex component 6B	-5.01746
dd_Smed_v6_219_0_1	ctsc	CTSC	Dipeptidyl peptidase 1	-2.7941
dd_Smed_v6_21906_0_1	NA	ME1	NADP-dependent malic enzyme
dd_Smed_v6_21959_0_1	NA	NA	NA
dd_Smed_v6_2196_0_1	NA	NA	NA
dd_Smed_v6_2209_0_1	NA	DLG5	Disks large homolog 5	-2.35504
dd_Smed_v6_2212_0_1	NA	NA	NA
dd_Smed_v6_2215_0_1	NA	FAM46D	Protein FAM46D
dd_Smed_v6_22158_0_1	NA	NA	NA
dd_Smed_v6_2219_0_1	hal	HAL	Histidine ammonia-lyase
dd_Smed_v6_2224_0_1	NA	ENPEP	Aminopeptidase
dd_Smed_v6_2226_0_1	NA	EEF2K	Eukaryotic elongation factor 2 kinase
dd_Smed_v6_2228_0_1	NA	ACF	Apobec-1 complementation factor, isoform CRA_b
dd_Smed_v6_2230_0_1	NA	ATP1B2	Sodium/potassium-transporting ATPase subunit beta-2	-2.44744
dd_Smed_v6_2234_0_1	NA	NA	NA
dd_Smed_v6_2235_0_1	NA	OSTF1	Osteoclast-stimulating factor 1
dd_Smed_v6_2239_0_1	NA	PTP4A3	Protein tyrosine phosphatase type IVA 3
dd_Smed_v6_22397_0_1	NA	NA	NA
dd_Smed_v6_2249_0_1	NA	PEX13	Peroxisomal membrane protein PEX13
dd_Smed_v6_2256_0_1	NA	TSPO	Translocator protein	-4.9483
dd_Smed_v6_2257_0_1	NA	CYP3A43/CYP3A4	Cytochrome P450	-2.96929
dd_Smed_v6_2260_0_1	NA	NA	NA
dd_Smed_v6_2262_0_1	NA	NA	NA
dd_Smed_v6_2267_0_1	NA	EIF5	Eukaryotic translation initiation factor 5	-2.60123
dd_Smed_v6_2271_0_1	NA	SNX32	Sorting nexin-32	-2.27482
dd_Smed_v6_2272_0_1	NA	FLNB	Filamin-B
dd_Smed_v6_2277_0_1	NA	TRAF6	TNF receptor-associated factor 6	-4.47881
dd_Smed_v6_2281_0_1	NA	SFT2D1	Vesicle transport protein SFT2A
dd_Smed_v6_2282_0_1	NA	CPA4	Carboxypeptidase A4	-2.50914
dd_Smed_v6_229_0_1	novel	NA	NA
dd_Smed_v6_2290_0_1	NA	HSD17B14	17-beta-hydroxysteroid dehydrogenase 14
dd_Smed_v6_2291_0_1	NA	SRC	Proto-oncogene tyrosine-protein kinase Src
dd_Smed_v6_2299_0_1	NA	USP20	Ubiquitin carboxyl-terminal hydrolase 20	-2.77149
dd_Smed_v6_2304_0_1	NA	SCARB2	Lysosome membrane protein 2	-3.19538
dd_Smed_v6_23048_0_1	NA	NA	NA
dd_Smed_v6_23064_0_1	NA	NA	NA
dd_Smed_v6_231_0_1	NA	TBCA	Tubulin-specific chaperone A
dd_Smed_v6_2311_0_1	NA	ELOVL4	Elongation of very long chain fatty acids protein 4	-4.29945
dd_Smed_v6_2318_0_1	NA	NA	NA
dd_Smed_v6_2328_0_1	NA	MTAP	S-methyl-5'-thioadenosine phosphorylase
dd_Smed_v6_2329_0_1	NA	HEL-S-44	Superoxide dismutase [Cu-Zn]	-3.20783
dd_Smed_v6_2336_0_1	NA	HMCN1	Hemicentin-1	-2.6176
dd_Smed_v6_2345_0_1	NA	ADD1	Alpha-adducin
dd_Smed_v6_2350_0_1	NA	NA	NA
dd_Smed_v6_2351_0_1	cyp2b19	CYP2B6	Cytochrome P450 2B6
dd_Smed_v6_2361_0_1	slc47a1	SLC47A1	Multidrug and toxin extrusion protein 1	down
dd_Smed_v6_2368_0_1	novel	NA	NA
dd_Smed_v6_2387_0_1	NA	NCKAP1	Nck-associated protein 1	-2.64107
dd_Smed_v6_2388_0_1	NA	PPT1	Palmitoyl-protein thioesterase 1	-3.31266
dd_Smed_v6_2391_0_1	NA	TRAF6	TNF receptor-associated factor 6	-2.81432
dd_Smed_v6_2394_0_1	NA	CYP2J2	Cytochrome P450 2J2
dd_Smed_v6_2397_0_1	NA	NA	NA
dd_Smed_v6_2398_0_1	NA	NA	NA
dd_Smed_v6_2399_0_1	NA	CAPZA2	F-actin-capping protein subunit alpha-2	-2.9278
dd_Smed_v6_2401_0_1	NA	NA	NA
dd_Smed_v6_241_0_1	psap	PSAP	Prosaposin	-2.58859
dd_Smed_v6_2414_0_1	NA	ACSBG2	Long-chain-fatty-acid--CoA ligase ACSBG2	-2.72337
dd_Smed_v6_2424_0_1	NA	ZDHHC17	Palmitoyltransferase ZDHHC17	-3.6894
dd_Smed_v6_2429_0_1	NA	NA	NA
dd_Smed_v6_2433_0_1	NA	NA	NA
dd_Smed_v6_2445_0_1	NA	GPAT4	Glycerol-3-phosphate acyltransferase 4	-2.67406
dd_Smed_v6_2446_0_1	NA	NA	NA
dd_Smed_v6_2447_0_1	NA	TOM1L2	TOM1-like protein 2
dd_Smed_v6_245_0_1	NA	NA	NA
dd_Smed_v6_2464_0_1	NA	HSD17B12	Very-long-chain 3-oxoacyl-CoA reductase
dd_Smed_v6_24642_0_1	NA	NA	NA
dd_Smed_v6_2465_0_1	NA	ARL8B	ADP-ribosylation factor-like protein 8B	-4.21181
dd_Smed_v6_2467_0_1	NA	TPD52	Tumor protein D52
dd_Smed_v6_2472_0_1	NA	DGAT1	Diacylglycerol O-acyltransferase 1
dd_Smed_v6_2480_0_1	NA	NAPB	Beta-soluble NSF attachment protein
dd_Smed_v6_2482_0_1	NA	TXNDC17	Thioredoxin domain-containing protein 17	-2.77503
dd_Smed_v6_2486_0_1	NA	RAB24	Ras-related protein Rab-24
dd_Smed_v6_2489_0_1	NA	TM2D1	TM2 domain-containing protein 1	-3.10722
dd_Smed_v6_2490_0_1	NA	UBB	Epididymis secretory protein Li 50
dd_Smed_v6_2494_0_1	NA	RAB43	Ras-related protein Rab-43
dd_Smed_v6_2495_0_1	NA	NA	NA
dd_Smed_v6_25_0_1	nid2	NID2	Nidogen-2
dd_Smed_v6_2501_0_1	NA	COMMD4	COMM domain-containing protein 4
dd_Smed_v6_2506_0_1	novel	NA	NA
dd_Smed_v6_2508_0_1	NA	KLHDC8A	Kelch domain-containing protein 8A
dd_Smed_v6_2510_0_1	NA	AP3S2	AP-3 complex subunit sigma-2	-3.36736
dd_Smed_v6_2511_0_1	NA	NA	NA
dd_Smed_v6_2513_0_1	NA	SNX27	Sorting nexin-27
dd_Smed_v6_2519_0_1	NA	CCDC93	Coiled-coil domain-containing protein 93	-3.33575
dd_Smed_v6_2523_0_1	NA	MELTF	Melanotransferrin	-3.07342
dd_Smed_v6_253_0_1	NA	ATP6V0C	V-type proton ATPase 16 kDa proteolipid subunit	-3.10706
dd_Smed_v6_2530_0_1	NA	SLC38A7	Putative sodium-coupled neutral amino acid transporter 7
dd_Smed_v6_2531_0_1	NA	BLOC1S1	Biogenesis of lysosome-related organelles complex 1 subunit 1
dd_Smed_v6_2533_0_1	NA	DIAPH2	Protein diaphanous homolog 2
dd_Smed_v6_2534_0_1	NA	AP3D1	AP-3 complex subunit delta-1	-3.36736
dd_Smed_v6_2535_0_1	NA	NA	NA
dd_Smed_v6_2538_0_1	NA	PRKAA2	5'-AMP-activated protein kinase catalytic subunit alpha-2
dd_Smed_v6_25388_0_1	NA	NA	NA
dd_Smed_v6_254_0_1	cg7631	BMP1	Bone morphogenetic protein 1
dd_Smed_v6_2549_0_1	NA	RUFY1	RUN and FYVE domain-containing protein 1
dd_Smed_v6_2552_0_1	NA	NA	NA
dd_Smed_v6_2559_0_1	NA	C10orf11	Leucine-rich repeat-containing protein C10orf11
dd_Smed_v6_25604_0_1	NA	NA	NA
dd_Smed_v6_2563_0_1	NA	TWF1	Twinfilin-1	-2.74974
dd_Smed_v6_2564_0_1	NA	NA	NA
dd_Smed_v6_2567_0_1	NA	SOAT1	Sterol O-acyltransferase 1
dd_Smed_v6_257_0_1	lipf	LIPF	Gastric triacylglycerol lipase	-2.31373
dd_Smed_v6_2572_0_1	NA	VPS28	Vacuolar protein sorting-associated protein 28 homolog	-3.43477
dd_Smed_v6_2579_0_1	NA	DNAJC13	DnaJ homolog subfamily C member 13	-4.00953
dd_Smed_v6_2581_0_1	NA	ZNFX1	NFX1-type zinc finger-containing protein 1	-2.58382
dd_Smed_v6_2582_1_1	NA	METTL27	Methyltransferase-like protein 27	-2.73727
dd_Smed_v6_2583_0_1	NA	DNM3	Dynamin-3
dd_Smed_v6_2584_0_1	NA	NA	NA
dd_Smed_v6_2591_0_1	NA	MRC1	Macrophage mannose receptor 1	-2.47827
dd_Smed_v6_2596_0_1	NA	SLC36A1	Proton-coupled amino acid transporter 1
dd_Smed_v6_2599_0_1	NA	TRAF5	TNF receptor-associated factor 5	-4.95828
dd_Smed_v6_260_0_1	tsr	CFL1	Cofilin-1
dd_Smed_v6_2603_0_1	NA	RAB1B	Ras-related protein Rab-1B
dd_Smed_v6_2604_0_1	NA	NA	NA
dd_Smed_v6_2615_1_1	NA	NA	NA
dd_Smed_v6_2622_0_1	NA	CNTNAP2	Contactin-associated protein-like 2
dd_Smed_v6_2623_0_1	NA	NA	NA
dd_Smed_v6_2630_0_1	NA	NA	NA
dd_Smed_v6_2631_0_1	NA	UBE2K	Ubiquitin-conjugating enzyme E2 K	-3.0001
dd_Smed_v6_2636_0_1	NA	ARPP19	cAMP-regulated phosphoprotein 19
dd_Smed_v6_2643_0_1	NA	NA	NA
dd_Smed_v6_2650_0_1	NA	AP1M1	AP-1 complex subunit mu-1	-2.61039
dd_Smed_v6_2652_0_1	NA	VPS35	Vacuolar protein sorting-associated protein 35
dd_Smed_v6_2654_0_1	NA	PCDH1	Protocadherin-1	down
dd_Smed_v6_2663_0_1	NA	ACADVL	Very long-chain specific acyl-CoA dehydrogenase, mitochondrial
dd_Smed_v6_2667_0_1	NA	ARL8B	ADP-ribosylation factor-like protein 8B	-4.21181
dd_Smed_v6_2669_0_1	NA	TRAF3	TNF receptor-associated factor 3	-4.33976
dd_Smed_v6_267_0_1	ctsla	CTSV	Cathepsin L2	-2.9718
dd_Smed_v6_2670_0_1	med21	MED21	Mediator of RNA polymerase II transcription subunit 21	-3.14447
dd_Smed_v6_2672_0_1	NA	TTN	Titin	-2.42353
dd_Smed_v6_2673_0_1	NA	CNTN2	Contactin-2
dd_Smed_v6_2681_0_1	NA	-	cDNA FLJ46199 fis, clone TESTI4007965, highly similar to AP-1 complex subunit gamma-1
dd_Smed_v6_2685_0_1	NA	GLMP	Glycosylated lysosomal membrane protein	-3.11719
dd_Smed_v6_2690_0_1	plb1	PLB1	Phospholipase B1, membrane-associated
dd_Smed_v6_2696_0_1	NA	ADIPOR2	Adiponectin receptor protein 2	-2.77716
dd_Smed_v6_2698_0_1	NA	TSPAN3	Tetraspanin-3	-3.10212
dd_Smed_v6_2699_0_1	NA	GALC	Galactocerebrosidase
dd_Smed_v6_270_0_1	NA	NA	NA
dd_Smed_v6_2702_0_1	NA	SCAMP1	Secretory carrier-associated membrane protein 1
dd_Smed_v6_2703_0_1	NA	PGS1	CDP-diacylglycerol--glycerol-3-phosphate 3-phosphatidyltransferase, mitochondrial
dd_Smed_v6_271_0_1	fabp7	FABP7	Fatty acid-binding protein, brain	-2.32467
dd_Smed_v6_2710_0_1	NA	SHB	SH2 domain-containing adapter protein B
dd_Smed_v6_2711_0_1	NA	NIT1	Nitrilase homolog 1
dd_Smed_v6_2715_0_1	NA	USP5	Ubiquitin carboxyl-terminal hydrolase 5	-3.21114
dd_Smed_v6_2716_0_1	nkx2.2	NKX2-2	Homeobox protein Nkx-2.2	-3.98022
dd_Smed_v6_2717_0_1	NA	CRYZ	Quinone oxidoreductase	-3.17018
dd_Smed_v6_2719_0_1	NA	NA	NA
dd_Smed_v6_272_0_1	NA	NA	NA
dd_Smed_v6_2731_0_1	NA	NA	NA
dd_Smed_v6_2732_0_1	NA	SNX33	Sorting nexin-33	-2.27482
dd_Smed_v6_2741_0_1	NA	CARHSP1	Calcium-regulated heat-stable protein 1
dd_Smed_v6_2743_0_1	NA	SHOC2	Leucine-rich repeat protein SHOC-2	-2.11404
dd_Smed_v6_2757_0_1	NA	UGCG	Ceramide glucosyltransferase	-3.40408
dd_Smed_v6_2775_0_1	NA	NA	NA
dd_Smed_v6_2782_0_1	NA	ANK3	Ankyrin-3
dd_Smed_v6_2783_0_1	NA	HMCN1	Hemicentin-1	-2.6176
dd_Smed_v6_2784_0_1	rhoab	RHOA	Transforming protein RhoA
dd_Smed_v6_279_0_1	rpz4	NA	NA
dd_Smed_v6_2790_0_1	NA	ARL6IP1	ADP-ribosylation factor-like protein 6-interacting protein 1
dd_Smed_v6_2791_0_1	NA	NA	NA
dd_Smed_v6_2795_0_1	NA	PSENEN	Gamma-secretase subunit PEN-2	-3.17774
dd_Smed_v6_28_0_1	NA	TFPI	Tissue factor pathway inhibitor	-4.59855
dd_Smed_v6_280_0_1	NA	ODC1	Ornithine decarboxylase
dd_Smed_v6_2804_0_1	NA	GMFB	Glia maturation factor beta	-3.2776
dd_Smed_v6_2813_0_1	chdh	CHDH	Choline dehydrogenase, mitochondrial	down
dd_Smed_v6_2825_0_1	NA	EPB41L3	Band 4.1-like protein 3	-3.02779
dd_Smed_v6_2826_0_1	NA	OPCML	Opioid-binding protein/cell adhesion molecule
dd_Smed_v6_2830_0_1	NA	NA	NA
dd_Smed_v6_2832_0_1	NA	ACSS3	Acyl-CoA synthetase short-chain family member 3, mitochondrial
dd_Smed_v6_2836_0_1	NA	APBA1	Amyloid beta A4 precursor protein-binding family A member 1
dd_Smed_v6_2839_0_1	NA	MTCH1	Mitochondrial carrier homolog 1
dd_Smed_v6_2840_0_1	NA	DNAJC5B	DnaJ homolog subfamily C member 5B	-4.00953
dd_Smed_v6_2841_0_1	NA	NA	NA
dd_Smed_v6_2845_0_1	NA	NA	NA
dd_Smed_v6_2862_0_1	NA	TSPAN31	Tetraspanin-31	-2.26868
dd_Smed_v6_2871_0_1	cyp2u1	CYP2U1	Cytochrome P450 2U1	-5.01591
dd_Smed_v6_2879_0_1	NA	RAB6A	RAB6A, member RAS oncogene family, isoform CRA_b
dd_Smed_v6_2886_0_1	zgc:153993	BAK1	Bcl-2 homologous antagonist/killer	-3.75638
dd_Smed_v6_2889_0_1	NA	NA	NA
dd_Smed_v6_2891_0_1	NA	PDCD10	Programmed cell death protein 10	-2.73963
dd_Smed_v6_2892_0_1	NA	SCP2	Non-specific lipid-transfer protein	-3.65264
dd_Smed_v6_2894_0_1	NA	AASS	Alpha-aminoadipic semialdehyde synthase, mitochondrial
dd_Smed_v6_2906_0_1	rab10	RAB10	Ras-related protein Rab-10	-4.33734
dd_Smed_v6_2908_0_1	NA	HGD	Homogentisate 1,2-dioxygenase	-2.4971
dd_Smed_v6_2914_0_1	rock1	ROCK1	Rho-associated protein kinase 1	-3.28765
dd_Smed_v6_2915_0_1	NA	RAB7L1	RAB7, member RAS oncogene family-like 1
dd_Smed_v6_2918_0_1	NA	SPNS1	Protein spinster homolog 1
dd_Smed_v6_2923_0_1	NA	ENOSF1	Mitochondrial enolase superfamily member 1
dd_Smed_v6_2929_0_1	NA	GLIPR2	Golgi-associated plant pathogenesis-related protein 1	-2.92603
dd_Smed_v6_2951_0_1	NA	SCARB2	Lysosome membrane protein 2	-2.91163
dd_Smed_v6_2970_0_1	NA	HAL	Histidine ammonia-lyase
dd_Smed_v6_2976_0_1	NA	NA	NA
dd_Smed_v6_2981_0_1	NA	NPL	N-acetylneuraminate lyase
dd_Smed_v6_2982_0_1	NA	NA	NA
dd_Smed_v6_2991_0_1	NA	RAB5A	Ras-related protein Rab-5A
dd_Smed_v6_2996_0_1	NA	RIN2	Ras and Rab interactor 2
dd_Smed_v6_3_0_1	NA	PS1TP5BP1	HCG15971, isoform CRA_a
dd_Smed_v6_300_0_1	spint3	COL6A3	Collagen alpha-3(VI) chain
dd_Smed_v6_3005_0_1	NA	ADD3	Gamma-adducin
dd_Smed_v6_3013_0_1	NA	NA	NA
dd_Smed_v6_3016_0_1	NA	NA	NA
dd_Smed_v6_3019_0_1	NA	SCCPDH	Saccharopine dehydrogenase-like oxidoreductase
dd_Smed_v6_3021_0_1	NA	ACSL4	Long-chain-fatty-acid--CoA ligase 4	-2.81012
dd_Smed_v6_3032_0_1	NA	HAAO	3-hydroxyanthranilate 3,4-dioxygenase	-3.11059
dd_Smed_v6_3038_0_1	NA	TRAF6	TNF receptor-associated factor 6	-2.81432
dd_Smed_v6_3041_0_1	NA	TMEM120B	Transmembrane protein 120B	-2.78086
dd_Smed_v6_3043_0_1	NA	CYLD	Ubiquitin carboxyl-terminal hydrolase CYLD	-3.35279
dd_Smed_v6_3045_0_1	fam21c	WASHC2A	WASH complex subunit 2A	-2.63025
dd_Smed_v6_30485_0_1	NA	NA	NA
dd_Smed_v6_3049_0_1	NA	HTT	Huntingtin	-6.00719
dd_Smed_v6_3050_0_1	NA	CAB39L	Calcium-binding protein 39-like	-2.7624
dd_Smed_v6_3051_0_1	NA	NA	NA
dd_Smed_v6_3066_0_1	NA	TMEM41A	Transmembrane protein 41A	-4.04407
dd_Smed_v6_3070_0_1	NA	CD109	CD109 antigen	-2.54766
dd_Smed_v6_3071_0_1	NA	CLCN7	H(+)/Cl(-) exchange transporter 7
dd_Smed_v6_3076_0_1	NA	NA	NA
dd_Smed_v6_3078_0_1	NA	-	Protein kinase C inhibitor-2
dd_Smed_v6_3084_0_1	NA	GALK2	N-acetylgalactosamine kinase	down
dd_Smed_v6_309_0_1	NA	NA	NA
dd_Smed_v6_3096_0_1	NA	CMTM8	CKLF-like MARVEL transmembrane domain-containing protein 8
dd_Smed_v6_3097_0_1	NA	TRAF5	TNF receptor-associated factor 5	-4.95828
dd_Smed_v6_31_0_1	ct14378	CPA6	Carboxypeptidase A6	-2.05666
dd_Smed_v6_3101_0_1	ank1	ANK1	Ankyrin-1
dd_Smed_v6_3106_0_1	cyp3a13	CYP3A4	Cytochrome P450 3A4	-2.89759
dd_Smed_v6_3108_0_1	NA	NA	NA
dd_Smed_v6_3125_0_1	NA	CLN5	Ceroid-lipofuscinosis neuronal protein 5	-5.14469
dd_Smed_v6_3128_0_1	NA	PCTK1	PCTK1 protein
dd_Smed_v6_3131_0_1	NA	MBOAT2	Lysophospholipid acyltransferase 2	-2.87429
dd_Smed_v6_3132_0_1	NA	NA	NA
dd_Smed_v6_3136_0_1	NA	PIKFYVE	1-phosphatidylinositol 3-phosphate 5-kinase	down
dd_Smed_v6_3137_0_1	NA	CERS1	Ceramide synthase 1	-2.51432
dd_Smed_v6_314_0_1	NA	NA	NA
dd_Smed_v6_3144_0_1	NA	COX11	Cytochrome c oxidase assembly protein COX11, mitochondrial
dd_Smed_v6_3145_0_1	NA	NA	NA
dd_Smed_v6_3148_0_1	NA	EHD1	EH domain-containing protein 1
dd_Smed_v6_3153_0_1	NA	SPG20	Spartin
dd_Smed_v6_3154_0_1	NA	AGXT2	Alanine--glyoxylate aminotransferase 2, mitochondrial	-3.30383
dd_Smed_v6_3157_0_1	NA	COMMD2	COMM domain-containing protein 2
dd_Smed_v6_3160_0_1	NA	ACADS	Short-chain specific acyl-CoA dehydrogenase, mitochondrial	-5.17204
dd_Smed_v6_3164_0_1	NA	RAB14	Ras-related protein Rab-14
dd_Smed_v6_3165_0_1	NA	ABHD4	Protein ABHD4
dd_Smed_v6_3174_0_1	NA	MLST8	Target of rapamycin complex subunit LST8
dd_Smed_v6_3179_0_1	NA	OSBPL2	Oxysterol-binding protein-related protein 2
dd_Smed_v6_3189_0_1	NA	WASF1	Wiskott-Aldrich syndrome protein family member 1
dd_Smed_v6_3194_0_1	NA	STK24	Epididymis secretory protein Li 95
dd_Smed_v6_3195_0_1	NA	NA	NA
dd_Smed_v6_32_0_1	NA	NA	NA
dd_Smed_v6_3200_0_1	NA	NA	NA
dd_Smed_v6_3205_0_1	NA	EHD4	EH domain-containing protein 4
dd_Smed_v6_3208_0_1	NA	CLIC4	Chloride intracellular channel protein 4
dd_Smed_v6_3209_0_1	NA	MANBA	Beta-mannosidase
dd_Smed_v6_3212_0_1	NA	EFR3B	Protein EFR3 homolog B
dd_Smed_v6_3217_0_1	NA	PYCR3	Pyrroline-5-carboxylate reductase 3
dd_Smed_v6_3236_0_1	NA	SLC30A3	Zinc transporter 3	-3.09829
dd_Smed_v6_324_0_1	NA	NA	NA
dd_Smed_v6_3252_0_1	NA	SLC16A12	Monocarboxylate transporter 12	down
dd_Smed_v6_3254_1_1	novel	NA	NA
dd_Smed_v6_3267_0_1	NA	RAB10	Ras-related protein Rab-10	-4.33734
dd_Smed_v6_3268_0_1	NA	OSBP2	Oxysterol-binding protein 2
dd_Smed_v6_32686_0_1	NA	NA	NA
dd_Smed_v6_3270_0_1	NA	ACOX3	Peroxisomal acyl-coenzyme A oxidase 3	-3.27213
dd_Smed_v6_3273_0_1	NA	EPG5	Ectopic P granules protein 5 homolog	-3.14921
dd_Smed_v6_3277_0_1	NA	ANK1	Ankyrin-1
dd_Smed_v6_3286_0_1	NA	MAP3K2	Mitogen-activated protein kinase kinase kinase 2	-2.69445
dd_Smed_v6_329_0_1	NA	CTSD	Cathepsin D	-1.72799
dd_Smed_v6_33_0_1	NA	SFTPA2	Pulmonary surfactant-associated protein A2
dd_Smed_v6_3308_0_1	NA	CDA	Cytidine deaminase
dd_Smed_v6_3309_0_1	NA	-	cDNA FLJ77654, highly similar to Homo sapiens guanine nucleotide binding protein (G protein), beta polypeptide 4 (GNB4), mRNA
dd_Smed_v6_33178_0_1	NA	NA	NA
dd_Smed_v6_3324_0_1	inhbab	-	Putative uncharacterized protein
dd_Smed_v6_3338_0_1	NA	ACP2	Lysosomal acid phosphatase	-5.70021
dd_Smed_v6_3344_0_1	NA	TMEM189	Transmembrane protein 189
dd_Smed_v6_335_0_1	NA	CS	Citrate synthase, mitochondrial
dd_Smed_v6_33503_0_1	NA	NA	NA
dd_Smed_v6_3352_0_1	NA	RBKS	Ribokinase	down
dd_Smed_v6_33595_0_1	NA	GVQW1	Protein GVQW1
dd_Smed_v6_3361_0_1	NA	PAK1	Serine/threonine-protein kinase PAK 1	-3.27022
dd_Smed_v6_3362_0_1	NA	RAC1	Ras-related C3 botulinum toxin substrate 1
dd_Smed_v6_3369_0_1	NA	WASHC5	WASH complex subunit 5	down
dd_Smed_v6_3370_0_1	NA	RAB7A	Ras-related protein Rab-7a	-4.2967
dd_Smed_v6_3371_0_1	NA	HSD17B12	Very-long-chain 3-oxoacyl-CoA reductase
dd_Smed_v6_3372_0_1	NA	MROH2B	Maestro heat-like repeat-containing protein family member 2B	-2.94089
dd_Smed_v6_3373_0_1	NA	PCYT2	Ethanolamine-phosphate cytidylyltransferase
dd_Smed_v6_3375_0_1	NA	APAF1	Apoptotic protease-activating factor 1	-3.35943
dd_Smed_v6_3376_0_1	NA	BPGAP1	BCH domain-containing Cdc42GAP-like protein
dd_Smed_v6_338_0_1	NA	UBA52	Ubiquitin A-52 residue ribosomal protein fusion product 1
dd_Smed_v6_3397_0_1	NA	NA	NA
dd_Smed_v6_3398_0_1	NA	WDFY3	WD repeat and FYVE domain-containing protein 3
dd_Smed_v6_3401_0_1	NA	HDAC11	Histone deacetylase 11	-3.1117
dd_Smed_v6_3405_0_1	NA	NA	NA
dd_Smed_v6_3416_0_1	NA	MIB1	E3 ubiquitin-protein ligase MIB1	-2.42804
dd_Smed_v6_3432_0_1	NA	SCUBE1	Signal peptide, CUB and EGF-like domain-containing protein 1
dd_Smed_v6_3436_0_1	NA	NA	NA
dd_Smed_v6_3439_0_1	NA	TMEM41A	Transmembrane protein 41A	-4.04407
dd_Smed_v6_3440_0_1	NA	NA	NA
dd_Smed_v6_3443_0_1	znf408	ZFP37	Zinc finger protein 37 homolog
dd_Smed_v6_3452_0_1	NA	NA	NA
dd_Smed_v6_3453_0_1	NA	TFPI2	Tissue factor pathway inhibitor 2	-4.59855
dd_Smed_v6_3455_0_1	cele_y59a8b	NA	NA
dd_Smed_v6_3459_0_1	NA	NA	NA
dd_Smed_v6_3470_0_1	NA	SCYL1	N-terminal kinase-like protein
dd_Smed_v6_3484_0_1	NA	MPPED1	Metallophosphoesterase domain-containing protein 1
dd_Smed_v6_34847_0_1	NA	NA	NA
dd_Smed_v6_3487_0_1	NA	RNF7	RING-box protein 2
dd_Smed_v6_3493_1_1	NA	DLG1	Disks large homolog 1	-2.35504
dd_Smed_v6_3499_0_1	NA	SLCO1B3	Solute carrier organic anion transporter family member 1B3
dd_Smed_v6_3507_0_1	NA	PRELID1	PRELI domain-containing protein 1, mitochondrial
dd_Smed_v6_3508_0_1	NA	SLC28A3	Solute carrier family 28 member 3
dd_Smed_v6_3509_0_1	NA	PRUNE1	Exopolyphosphatase PRUNE1
dd_Smed_v6_3510_0_1	NA	NA	NA
dd_Smed_v6_3512_0_1	NA	DHRS7B	Dehydrogenase/reductase SDR family member 7B	-4.68225
dd_Smed_v6_3520_0_1	NA	DSCR3	Down syndrome critical region protein 3	-2.75412
dd_Smed_v6_3535_0_1	NA	MRPS18B	28S ribosomal protein S18b, mitochondrial
dd_Smed_v6_354_0_1	NA	TSPAN3	Tetraspanin-3	-3.10212
dd_Smed_v6_3541_0_1	NA	NA	NA
dd_Smed_v6_3546_0_1	NA	THOP1	Thimet oligopeptidase 1
dd_Smed_v6_3550_0_1	tdo2	TDO2	Tryptophan 2,3-dioxygenase
dd_Smed_v6_3552_0_1	NA	COMMD7	COMM domain-containing protein 7
dd_Smed_v6_3557_0_1	NA	NA	NA
dd_Smed_v6_3560_0_1	NA	DDO	D-aspartate oxidase	-3.31204
dd_Smed_v6_3562_0_1	NA	TRAF6	TNF receptor-associated factor 6	-2.81432
dd_Smed_v6_3565_0_1	NA	RUNX1	Runt-related transcription factor 1
dd_Smed_v6_3569_0_1	NA	NA	NA
dd_Smed_v6_3575_0_1	NA	RBMS1	RNA-binding motif, single-stranded-interacting protein 1
dd_Smed_v6_3578_0_1	NA	SLC15A4	Solute carrier family 15 member 4
dd_Smed_v6_3592_0_1	NA	PLA2G15	Group XV phospholipase A2
dd_Smed_v6_3596_0_1	NA	SLC25A11	Mitochondrial 2-oxoglutarate/malate carrier protein	-4.35986
dd_Smed_v6_3599_0_1	NA	PIK3CB	Phosphatidylinositol 4,5-bisphosphate 3-kinase catalytic subunit beta isoform
dd_Smed_v6_3602_0_1	apmap	APMAP	Adipocyte plasma membrane-associated protein	-3.13425
dd_Smed_v6_3604_0_1	NA	MIB1	E3 ubiquitin-protein ligase MIB1	-2.42804
dd_Smed_v6_3611_0_1	NA	ABCD1	ATP-binding cassette sub-family D member 1
dd_Smed_v6_3616_0_1	trpml	MCOLN2	Mucolipin-2
dd_Smed_v6_3630_0_1	NA	APMAP	Adipocyte plasma membrane-associated protein	-3.13425
dd_Smed_v6_3632_0_1	tnx	TNXB	Tenascin-X
dd_Smed_v6_3637_0_1	NA	WASHC3	WASH complex subunit 3	-3.35184
dd_Smed_v6_3638_0_1	cbt	KLF13	Krueppel-like factor 13
dd_Smed_v6_3650_0_1	NA	TRAF5	TNF receptor-associated factor 5	-2.81344
dd_Smed_v6_3657_0_1	NA	PHKB	Phosphorylase b kinase regulatory subunit beta
dd_Smed_v6_3659_0_1	NA	NA	NA
dd_Smed_v6_366_0_1	NA	PGD	6-phosphogluconate dehydrogenase, decarboxylating
dd_Smed_v6_3661_0_1	NA	COG7	Conserved oligomeric Golgi complex subunit 7	-4.42583
dd_Smed_v6_3667_0_1	NA	MST4	Serine/threonine protein kinase MST4
dd_Smed_v6_3672_0_1	NA	TSPO	Translocator protein
dd_Smed_v6_3673_0_1	NA	AGMO	Alkylglycerol monooxygenase
dd_Smed_v6_3685_0_1	NA	MARK2	Serine/threonine-protein kinase MARK2
dd_Smed_v6_3687_0_1	NA	ITPKB	Inositol-trisphosphate 3-kinase B
dd_Smed_v6_3689_0_1	NA	NA	NA
dd_Smed_v6_3690_0_1	NA	-	cDNA FLJ60119, highly similar to Homo sapiens serine/threonine kinase 11 interacting protein (STK11IP), mRNA
dd_Smed_v6_3693_0_1	NA	ANKRD52	Serine/threonine-protein phosphatase 6 regulatory ankyrin repeat subunit C
dd_Smed_v6_370_0_1	NA	TFPI2	Tissue factor pathway inhibitor 2	-4.59855
dd_Smed_v6_3706_0_1	NA	TRAF3	TNF receptor-associated factor 3	-4.33976
dd_Smed_v6_3711_0_1	NA	PRKACB	cAMP-dependent protein kinase catalytic subunit beta
dd_Smed_v6_3712_0_1	NA	SQSTM1	Sequestosome-1	-2.54591
dd_Smed_v6_3713_0_1	NA	CNIH1	Protein cornichon homolog 1
dd_Smed_v6_3716_0_1	NA	SPG11	Spatacsin	-5.3857
dd_Smed_v6_3727_0_1	NA	NA	NA
dd_Smed_v6_3728_0_1	klk13	KLK13	Kallikrein-13	-2.2869
dd_Smed_v6_3737_0_1	NA	ARHGAP25	Rho GTPase-activating protein 25	-2.55784
dd_Smed_v6_3738_0_1	NA	NA	NA
dd_Smed_v6_37526_0_1	NA	NA	NA
dd_Smed_v6_3754_0_1	NA	ELMO2	Engulfment and cell motility protein 2
dd_Smed_v6_3760_0_1	NA	SEC24B	Protein transport protein Sec24B	-2.91598
dd_Smed_v6_3768_0_1	NA	HMCN1	Hemicentin-1	-2.49147
dd_Smed_v6_3769_0_1	NA	RABGGTB	Geranylgeranyl transferase type-2 subunit beta	-4.10812
dd_Smed_v6_377_0_1	NA	CACYBP	Calcyclin-binding protein
dd_Smed_v6_3770_0_1	NA	IDH1	Isocitrate dehydrogenase [NADP] cytoplasmic
dd_Smed_v6_3775_0_1	NA	USP20	Ubiquitin carboxyl-terminal hydrolase 20	-2.77149
dd_Smed_v6_3794_0_1	NA	PANK1	Pantothenate kinase 1
dd_Smed_v6_3795_0_1	novel	NA	NA
dd_Smed_v6_3798_0_1	NA	MAPK8IP3	C-Jun-amino-terminal kinase-interacting protein 3	down
dd_Smed_v6_3804_0_1	NA	ACOX3	Peroxisomal acyl-coenzyme A oxidase 3	-3.27213
dd_Smed_v6_3808_0_1	NA	RGN	Regucalcin
dd_Smed_v6_3811_0_1	NA	NA	NA
dd_Smed_v6_3817_0_1	NA	DDX3Y	ATP-dependent RNA helicase DDX3Y	down
dd_Smed_v6_3820_0_1	NA	NA	NA
dd_Smed_v6_3821_0_1	NA	SLC2A4RG	SLC2A4 regulator
dd_Smed_v6_3824_0_1	serpinb3a	SERPINB13	Serpin B13	-3.47534
dd_Smed_v6_3825_1_1	NA	NA	NA
dd_Smed_v6_3838_0_1	NA	PRKX	cAMP-dependent protein kinase catalytic subunit PRKX
dd_Smed_v6_3839_0_1	NA	SFT2D1	Vesicle transport protein SFT2A
dd_Smed_v6_3842_2_1	cg6153	PITHD1	PITH domain-containing protein 1
dd_Smed_v6_3864_0_1	NA	CAPN5	Calpain-5
dd_Smed_v6_3869_0_1	NA	NA	NA
dd_Smed_v6_3874_0_1	NA	SLC30A1	Zinc transporter 1	-3.09829
dd_Smed_v6_388_0_1	NA	DNM1L	Dynamin-1-like protein	-3.41825
dd_Smed_v6_3889_0_1	NA	RAB4B	Ras-related protein Rab-4B	-2.95518
dd_Smed_v6_3891_0_1	NA	NA	NA
dd_Smed_v6_390_0_1	NA	PSAP	Prosaposin	-2.58859
dd_Smed_v6_3900_1_1	NA	NA	NA
dd_Smed_v6_3903_0_1	ada	ADA	Adenosine deaminase
dd_Smed_v6_3906_0_1	NA	OTC	Ornithine carbamoyltransferase, mitochondrial
dd_Smed_v6_391_0_1	NA	NA	NA
dd_Smed_v6_3910_0_1	NA	IDI1	Isopentenyl-diphosphate Delta-isomerase 1
dd_Smed_v6_3912_0_1	NA	NA	NA
dd_Smed_v6_3921_0_1	NA	MTOR	Serine/threonine-protein kinase mTOR
dd_Smed_v6_3922_0_1	NA	ARHGAP44	Rho GTPase-activating protein 44	-3.00076
dd_Smed_v6_3925_0_1	NA	DTNBP1	Dysbindin
dd_Smed_v6_3928_0_1	NA	FMNL3	Formin-like protein 3
dd_Smed_v6_3933_1_1	NA	NA	NA
dd_Smed_v6_3936_0_1	NA	NA	NA
dd_Smed_v6_3945_0_1	NA	NA	NA
dd_Smed_v6_3947_0_1	NA	MTRR	Methionine synthase reductase
dd_Smed_v6_3948_0_1	NA	ACSS3	Acyl-CoA synthetase short-chain family member 3, mitochondrial
dd_Smed_v6_3949_0_1	NA	ZNF547	Trafficking protein particle complex 2, isoform CRA_a
dd_Smed_v6_3959_0_1	NA	PFKFB1	6-phosphofructo-2-kinase/fructose-2,6-bisphosphatase 1
dd_Smed_v6_396_0_1	NA	PSAP	Prosaposin	-2.32821
dd_Smed_v6_3969_0_1	NA	VPS33A	Vacuolar protein sorting-associated protein 33A	-3.43477
dd_Smed_v6_3972_0_1	NA	USP3	Ubiquitin carboxyl-terminal hydrolase 3	-3.80678
dd_Smed_v6_398_0_1	NA	ALDOC	Fructose-bisphosphate aldolase C
dd_Smed_v6_3982_0_1	NA	ABCC1	Multidrug resistance-associated protein 1
dd_Smed_v6_3983_0_1	NA	MSRA	Mitochondrial peptide methionine sulfoxide reductase
dd_Smed_v6_3990_0_1	NA	RHOT1	Mitochondrial Rho GTPase 1
dd_Smed_v6_3998_0_1	NA	HACD3	Very-long-chain (3R)-3-hydroxyacyl-CoA dehydratase 3	-3.9395
dd_Smed_v6_3999_0_1	NA	INPP4B	Type II inositol 3,4-bisphosphate 4-phosphatase
dd_Smed_v6_400_0_1	NA	ALDH2	Aldehyde dehydrogenase, mitochondrial	-2.94173
dd_Smed_v6_4001_0_1	NA	RAB18	Ras-related protein Rab-18
dd_Smed_v6_4003_0_1	NA	NUCB1	Nucleobindin-1	-3.21508
dd_Smed_v6_4004_0_1	NA	PGGT1B	Geranylgeranyl transferase type-1 subunit beta	-4.17412
dd_Smed_v6_4008_0_1	NA	PCYT1B	Choline-phosphate cytidylyltransferase B
dd_Smed_v6_4014_0_1	NA	DDHD2	Phospholipase DDHD2
dd_Smed_v6_402_1_1	NA	NA	NA
dd_Smed_v6_4043_0_1	NA	EXOC8	Exocyst complex component 8	-5.01746
dd_Smed_v6_4045_0_1	NA	ABHD17A	Protein ABHD17A
dd_Smed_v6_4050_0_1	NA	SGPP1	Sphingosine-1-phosphate phosphatase 1
dd_Smed_v6_4054_0_1	NA	NA	NA
dd_Smed_v6_4056_0_1	NA	GLB1	Beta-galactosidase	-5.26017
dd_Smed_v6_4075_0_1	gata456	GATA4	Transcription factor GATA-4
dd_Smed_v6_4076_1_1	NA	CLCN3	H(+)/Cl(-) exchange transporter 3
dd_Smed_v6_4081_0_1	NA	ABCG2	ATP-binding cassette sub-family G member 2
dd_Smed_v6_4090_0_1	NA	TMPRSS11D	Transmembrane protease serine 11D	-1.89324
dd_Smed_v6_4091_0_1	NA	NA	NA
dd_Smed_v6_41_0_1	spint3	TFPI	Tissue factor pathway inhibitor	-4.59855
dd_Smed_v6_4108_0_1	NA	CD180	CD180 antigen
dd_Smed_v6_4116_0_1	NA	STARD7	StAR-related lipid transfer protein 7, mitochondrial	down
dd_Smed_v6_4119_0_1	NA	SPNS1	Protein spinster homolog 1
dd_Smed_v6_412_0_1	NA	TFPI	Tissue factor pathway inhibitor
dd_Smed_v6_4120_0_1	loc100329520	INHBE	Inhibin beta E chain
dd_Smed_v6_413_0_1	oys	MBOAT2	Lysophospholipid acyltransferase 2
dd_Smed_v6_4132_0_1	NA	BACE1	Beta-secretase 1
dd_Smed_v6_4143_0_1	NA	PSMC3	26S protease regulatory subunit 6A
dd_Smed_v6_4148_0_1	NA	TRAF2	TNF receptor-associated factor 2	-3.99512
dd_Smed_v6_4154_0_1	NA	GPC4	Glypican-4	-5.15558
dd_Smed_v6_4161_0_1	NA	NA	NA
dd_Smed_v6_4162_0_1	NA	PHACTR4	Phosphatase and actin regulator 4
dd_Smed_v6_417_0_1	NA	PAK2	Serine/threonine-protein kinase PAK 2
dd_Smed_v6_4170_0_1	NA	STK25	Serine/threonine-protein kinase 25	-3.06282
dd_Smed_v6_4175_0_1	NA	NA	NA
dd_Smed_v6_41762_0_1	NA	NA	NA
dd_Smed_v6_4178_0_1	NA	WDR45B	WD repeat domain phosphoinositide-interacting protein 3	-3.34298
dd_Smed_v6_4182_0_1	NA	SPG21	Maspardin
dd_Smed_v6_4183_0_1	NA	WASHC4	WASH complex subunit 4	-3.93198
dd_Smed_v6_4184_0_1	NA	ENTPD1	Ectonucleoside triphosphate diphosphohydrolase 1	-3.45854
dd_Smed_v6_4187_0_1	NA	RNF185	E3 ubiquitin-protein ligase RNF185	-2.91947
dd_Smed_v6_419_0_1	NA	RAB7A	Ras-related protein Rab-7a	-2.50467
dd_Smed_v6_4190_0_1	NA	GRAP	GRB2-related adapter protein
dd_Smed_v6_4192_0_1	NA	SLC44A2	Choline transporter-like protein 2
dd_Smed_v6_4193_0_1	NA	SVIL	Supervillin
dd_Smed_v6_4195_0_1	NA	NA	NA
dd_Smed_v6_4198_0_1	sgk3	SGK3	Serine/threonine-protein kinase Sgk3
dd_Smed_v6_42_0_1	NA	NA	NA
dd_Smed_v6_4201_0_1	NA	PDP2	[Pyruvate dehydrogenase [acetyl-transferring]]-phosphatase 2, mitochondrial
dd_Smed_v6_4206_0_1	NA	PREP	Prolyl endopeptidase
dd_Smed_v6_4212_0_1	NA	NA	NA
dd_Smed_v6_4213_0_1	NA	NA	NA
dd_Smed_v6_4219_0_1	NA	UBE2D3	Ubiquitin-conjugating enzyme E2 D3	-5.13529
dd_Smed_v6_423_0_1	csta	CSTA	Cystatin-A
dd_Smed_v6_4236_0_1	NA	UBR2	E3 ubiquitin-protein ligase UBR2	-4.44329
dd_Smed_v6_4243_0_1	NA	SNX13	Sorting nexin-13	-2.71977
dd_Smed_v6_4253_0_1	NA	ARHGAP35	Rho GTPase-activating protein 35	-3.00076
dd_Smed_v6_4259_0_1	NA	MAP3K4	Mitogen-activated protein kinase kinase kinase 4
dd_Smed_v6_4260_0_1	NA	MAT2B	Methionine adenosyltransferase 2 subunit beta
dd_Smed_v6_4270_0_1	NA	GLTPD1	Ceramide-1-phosphate transfer protein	-4.40042
dd_Smed_v6_4278_0_1	NA	SOAT1	Sterol O-acyltransferase 1
dd_Smed_v6_42836_0_1	NA	NA	NA
dd_Smed_v6_4285_0_1	NA	NA	NA
dd_Smed_v6_4286_0_1	NA	TEX2	Testis-expressed protein 2	-3.24513
dd_Smed_v6_4287_0_1	NA	NA	NA
dd_Smed_v6_4288_0_1	NA	NA	NA
dd_Smed_v6_4290_0_1	NA	SLC6A5	Sodium- and chloride-dependent glycine transporter 2
dd_Smed_v6_4292_0_1	NA	NA	NA
dd_Smed_v6_4297_0_1	NA	RAB6B	Ras-related protein Rab-6B
dd_Smed_v6_4305_0_1	NA	LDAH	Lipid droplet-associated hydrolase
dd_Smed_v6_4309_0_1	NA	MPP2	MAGUK p55 subfamily member 2	-2.80074
dd_Smed_v6_4312_0_1	NA	PLSCR1	Phospholipid scramblase 1	-3.71921
dd_Smed_v6_4318_0_1	NA	NA	NA
dd_Smed_v6_4319_0_1	NA	CYP3A5	Cytochrome P450 3A5
dd_Smed_v6_4322_0_1	NA	ANK3	Ankyrin-3
dd_Smed_v6_4332_0_1	NA	ARAP2	Arf-GAP with Rho-GAP domain, ANK repeat and PH domain-containing protein 2
dd_Smed_v6_4339_0_1	NA	NA	NA
dd_Smed_v6_43390_0_1	NA	NA	NA
dd_Smed_v6_4357_0_1	NA	NA	NA
dd_Smed_v6_4363_0_1	NA	NA	NA
dd_Smed_v6_4367_0_1	NA	ABAT	4-aminobutyrate aminotransferase isoform A
dd_Smed_v6_4368_0_1	NA	TRAF2	TNF receptor-associated factor 2	-2.71278
dd_Smed_v6_4371_0_1	NA	SHANK3	SH3 and multiple ankyrin repeat domains protein 3
dd_Smed_v6_4388_0_1	NA	RRAGA	Ras-related GTP-binding protein A
dd_Smed_v6_4390_0_1	NA	NA	NA
dd_Smed_v6_4391_0_1	NA	AASDHPPT	L-aminoadipate-semialdehyde dehydrogenase-phosphopantetheinyl transferase
dd_Smed_v6_4392_0_1	NA	TRAF3	TNF receptor-associated factor 3	-2.49062
dd_Smed_v6_4393_0_1	NA	AKT3	RAC-gamma serine/threonine-protein kinase
dd_Smed_v6_4396_0_1	NA	SLC2A1	Solute carrier family 2, facilitated glucose transporter member 1	down
dd_Smed_v6_4399_0_1	NA	MAPKAPK3	MAP kinase-activated protein kinase 3
dd_Smed_v6_44_0_1	cg44251	NA	NA
dd_Smed_v6_440_0_1	cd63	CD63	CD63 antigen	-3.21676
dd_Smed_v6_4411_0_1	NA	NPC2	Epididymal secretory protein E1	-2.87864
dd_Smed_v6_4414_0_1	NA	UBA52	Ubiquitin A-52 residue ribosomal protein fusion product 1
dd_Smed_v6_4416_0_1	NA	GCDH	Glutaryl-CoA dehydrogenase, mitochondrial	-2.68918
dd_Smed_v6_4418_0_1	NA	TMEM63C	Calcium permeable stress-gated cation channel 1
dd_Smed_v6_442_0_1	grn	GRN	Granulins	-2.57827
dd_Smed_v6_443_0_1	NA	FTH1	Ferritin heavy chain	down
dd_Smed_v6_4436_0_1	NA	DSTYK	Dual serine/threonine and tyrosine protein kinase	-3.62386
dd_Smed_v6_4438_0_1	NA	NA	NA
dd_Smed_v6_4445_0_1	NA	NA	NA
dd_Smed_v6_4446_0_1	NA	PPP1R9B	Neurabin-2
dd_Smed_v6_4447_0_1	NA	MAP3K3	Mitogen-activated protein kinase kinase kinase 3	-3.27395
dd_Smed_v6_4449_0_1	cyp2a6	CYP2A6	Cytochrome P450 2A6
dd_Smed_v6_4450_0_1	NA	ATL1	Atlastin-1	-2.65818
dd_Smed_v6_4461_0_1	NA	NA	NA
dd_Smed_v6_4469_0_1	NA	NA	NA
dd_Smed_v6_4478_0_1	NA	CALML5	Calmodulin-like protein 5
dd_Smed_v6_448_0_1	NA	CORO1C	Coronin-1C	-2.15071
dd_Smed_v6_4486_0_1	NA	MAP4K4	Mitogen-activated protein kinase kinase kinase kinase 4
dd_Smed_v6_4487_0_1	NA	H2AFY2	Core histone macro-H2A.2
dd_Smed_v6_4489_0_1	NA	STX1A	Syntaxin-1A	-2.97871
dd_Smed_v6_4493_0_1	NA	GNAL	Guanine nucleotide-binding protein G(olf) subunit alpha
dd_Smed_v6_4496_0_1	NA	MPPED1	Metallophosphoesterase domain-containing protein 1
dd_Smed_v6_452_0_1	NA	TUBA1A	Tubulin alpha-1A chain	-2.32791
dd_Smed_v6_4520_0_1	NA	MPDZ	Multiple PDZ domain protein
dd_Smed_v6_4522_0_1	NA	SNRK	SNF-related serine/threonine-protein kinase	-2.7566
dd_Smed_v6_45228_0_1	NA	NA	NA
dd_Smed_v6_4523_0_1	NA	BCO2	Beta,beta-carotene 9',10'-oxygenase	-3.43122
dd_Smed_v6_4529_0_1	NA	SYVN1	E3 ubiquitin-protein ligase synoviolin
dd_Smed_v6_4532_0_1	NA	TSNAXIP1	Translin-associated factor X-interacting protein 1
dd_Smed_v6_4534_0_1	NA	VPS16	Vacuolar protein sorting-associated protein 16 homolog	down
dd_Smed_v6_4550_0_1	NA	VPS18	Vacuolar protein sorting-associated protein 18 homolog	down
dd_Smed_v6_4553_0_1	NA	STK4	Serine/threonine-protein kinase 4	-4.29458
dd_Smed_v6_4554_0_1	NA	ADHFE1	Hydroxyacid-oxoacid transhydrogenase, mitochondrial
dd_Smed_v6_4557_0_1	NA	PEX5	Peroxisomal targeting signal 1 receptor	-2.84217
dd_Smed_v6_456_0_1	NA	CTSF	Cathepsin F
dd_Smed_v6_4567_0_1	NA	NA	NA
dd_Smed_v6_4568_0_1	NA	MICALL1	MICAL-like protein 1
dd_Smed_v6_457_0_1	NA	HEL-S-69p	Peptidyl-prolyl cis-trans isomerase	-2.75784
dd_Smed_v6_4570_0_1	NA	KLK13	Kallikrein-13	-2.88166
dd_Smed_v6_4571_0_1	NA	CTNS	Cystinosin
dd_Smed_v6_4574_0_1	NA	NA	NA
dd_Smed_v6_4582_0_1	NA	NA	NA
dd_Smed_v6_4589_0_1	NA	NA	NA
dd_Smed_v6_4591_0_1	ggt1	GGT1	Gamma-glutamyltranspeptidase 1
dd_Smed_v6_4596_0_1	NA	FLVCR2	Feline leukemia virus subgroup C receptor-related protein 2	-3.82648
dd_Smed_v6_4598_0_1	NA	NA	NA
dd_Smed_v6_4607_0_1	NA	NA	NA
dd_Smed_v6_4615_0_1	NA	GALNT1	Polypeptide N-acetylgalactosaminyltransferase 1	-5.85519
dd_Smed_v6_4616_0_1	NA	VAC14	Protein VAC14 homolog
dd_Smed_v6_4619_0_1	NA	DUSP10	Dual specificity protein phosphatase 10	-3.89355
dd_Smed_v6_4622_0_1	NA	SULT1C4	Sulfotransferase 1C4
dd_Smed_v6_4626_0_1	NA	XIAP	E3 ubiquitin-protein ligase XIAP	-3.00719
dd_Smed_v6_463_0_1	NA	NA	NA
dd_Smed_v6_4634_0_1	NA	SLC16A12	Monocarboxylate transporter 12	down
dd_Smed_v6_465_0_1	NA	NA	NA
dd_Smed_v6_4655_0_1	NA	C5orf22	UPF0489 protein C5orf22
dd_Smed_v6_4660_0_1	NA	NA	NA
dd_Smed_v6_4666_0_1	NA	NA	NA
dd_Smed_v6_4668_0_1	NA	GAA	Lysosomal alpha-glucosidase
dd_Smed_v6_4672_0_1	NA	NA	NA
dd_Smed_v6_4674_0_1	NA	NCEH1	Neutral cholesterol ester hydrolase 1
dd_Smed_v6_4678_0_1	NA	NA	NA
dd_Smed_v6_4685_0_1	creb1	CREB1	CREB1 protein
dd_Smed_v6_4693_0_1	lipf	LIPF	Gastric triacylglycerol lipase	-2.8588
dd_Smed_v6_4694_0_1	NA	SLC16A14	Monocarboxylate transporter 14	down
dd_Smed_v6_4695_0_1	NA	WNK4	Serine/threonine-protein kinase WNK4
dd_Smed_v6_4702_0_1	NA	NA	NA
dd_Smed_v6_4722_0_1	NA	MAP2K3	Dual specificity mitogen-activated protein kinase kinase 3
dd_Smed_v6_4729_0_1	NA	TRAF3	TNF receptor-associated factor 3	-4.33976
dd_Smed_v6_4733_0_1	NA	NA	NA
dd_Smed_v6_4738_0_1	NA	PKM2	Pyruvate kinase	-3.21082
dd_Smed_v6_4739_0_1	NA	SLC11A2	Natural resistance-associated macrophage protein 2
dd_Smed_v6_4741_0_1	NA	GPR137B	Integral membrane protein GPR137B
dd_Smed_v6_4756_0_1	NA	NA	NA
dd_Smed_v6_4759_0_1	NA	-	cDNA FLJ52081, highly similar to Regulatory-associated protein of mTOR
dd_Smed_v6_476_0_1	NA	GDI2	Rab GDP dissociation inhibitor beta
dd_Smed_v6_4760_0_1	NA	USP2	Ubiquitin carboxyl-terminal hydrolase 2	-2.77149
dd_Smed_v6_4766_0_1	NA	NAA60	N-alpha-acetyltransferase 60	-6.49262
dd_Smed_v6_4769_0_1	NA	NA	NA
dd_Smed_v6_4773_0_1	NA	CTSA	Lysosomal protective protein	-4.63137
dd_Smed_v6_4779_0_1	NA	EPN1	Epsin-1
dd_Smed_v6_4785_0_1	NA	ASMTL	N-acetylserotonin O-methyltransferase-like protein
dd_Smed_v6_479_0_1	NA	NA	NA
dd_Smed_v6_4792_0_1	ft	NOTCH4	Neurogenic locus notch homolog protein 4	-5.27022
dd_Smed_v6_4794_0_1	NA	PIK3R1	Phosphatidylinositol 3-kinase regulatory subunit alpha
dd_Smed_v6_48_0_1	ctsl.1	CTSL	Cathepsin L1
dd_Smed_v6_4801_0_1	NA	NA	NA
dd_Smed_v6_4809_0_1	NA	NA	NA
dd_Smed_v6_4821_0_1	NA	PXK	PX domain-containing protein kinase-like protein
dd_Smed_v6_4823_0_1	NA	GGA1	ADP-ribosylation factor-binding protein GGA1
dd_Smed_v6_4828_0_1	NA	NA	NA
dd_Smed_v6_4832_0_1	NA	CARMIL1	F-actin-uncapping protein LRRC16A
dd_Smed_v6_4834_0_1	NA	SDR16C5	Epidermal retinol dehydrogenase 2
dd_Smed_v6_4836_0_1	NA	SLC2A13	Proton myo-inositol cotransporter	-7.63946
dd_Smed_v6_4846_0_1	NA	AP3M1	AP-3 complex subunit mu-1
dd_Smed_v6_4849_0_1	NA	MAP3K5	Mitogen-activated protein kinase kinase kinase 5
dd_Smed_v6_485_0_1	NA	PLBD2	Putative phospholipase B-like 2
dd_Smed_v6_4851_0_1	NA	TMEM245	Transmembrane protein 245	-4.44856
dd_Smed_v6_4858_0_1	NA	TMEM106A	Transmembrane protein 106A
dd_Smed_v6_4869_0_1	NA	USP47	Ubiquitin carboxyl-terminal hydrolase 47	-3.80678
dd_Smed_v6_487_0_1	NA	GCLM	Glutamate--cysteine ligase regulatory subunit	-2.78284
dd_Smed_v6_4876_0_1	NA	NA	NA
dd_Smed_v6_488_0_1	NA	RAB1A	Ras-related protein Rab-1A
dd_Smed_v6_4884_0_1	NA	NA	NA
dd_Smed_v6_4885_0_1	NA	NA	NA
dd_Smed_v6_4894_0_1	NA	WDFY2	WD repeat and FYVE domain-containing protein 2
dd_Smed_v6_4896_0_1	NA	HPRT1	Hypoxanthine-guanine phosphoribosyltransferase	-3.20464
dd_Smed_v6_4901_0_1	NA	CPT1A	Carnitine O-palmitoyltransferase 1, liver isoform	-3.75127
dd_Smed_v6_491_0_1	NA	RAB7A	Ras-related protein Rab-7a	-2.50467
dd_Smed_v6_4918_0_1	NA	TMUB2	Transmembrane and ubiquitin-like domain-containing protein 2
dd_Smed_v6_492_0_1	NA	FAM213B	Prostamide/prostaglandin F synthase
dd_Smed_v6_4921_0_1	NA	ANK2	Ankyrin-2	-2.72109
dd_Smed_v6_4922_0_1	NA	ACAD10	Acyl-CoA dehydrogenase family member 10	-4.3062
dd_Smed_v6_4923_0_1	NA	NA	NA
dd_Smed_v6_4925_0_1	NA	TPTE2	Phosphatidylinositol 3,4,5-trisphosphate 3-phosphatase TPTE2	-5.81651
dd_Smed_v6_4927_0_1	NA	COQ9	Ubiquinone biosynthesis protein COQ9, mitochondrial
dd_Smed_v6_4929_0_1	NA	PPP4R1	Serine/threonine-protein phosphatase 4 regulatory subunit 1	-2.88529
dd_Smed_v6_4932_0_1	NA	NA	NA
dd_Smed_v6_4935_0_1	NA	NLGN4X	Neuroligin-4, X-linked
dd_Smed_v6_4936_0_1	NA	NA	NA
dd_Smed_v6_4946_0_1	NA	AGPAT4	1-acyl-sn-glycerol-3-phosphate acyltransferase delta
dd_Smed_v6_4947_0_1	mogat2	MOGAT2	2-acylglycerol O-acyltransferase 2
dd_Smed_v6_4958_0_1	NA	PPM1E	Protein phosphatase 1E
dd_Smed_v6_4964_0_1	NA	RAB11A	Ras-related protein Rab-11A
dd_Smed_v6_4970_0_1	NA	ACP5	Tartrate-resistant acid phosphatase type 5
dd_Smed_v6_4971_0_1	NA	NA	NA
dd_Smed_v6_498_0_1	NA	STARD10	START domain-containing protein 10	-3.05895
dd_Smed_v6_4983_0_1	NA	FAM200B	Protein FAM200B
dd_Smed_v6_4992_0_1	zfand4	ZFAND5	AN1-type zinc finger protein 5
dd_Smed_v6_4993_0_1	NA	USP46	Ubiquitin carboxyl-terminal hydrolase 46	-3.24287
dd_Smed_v6_4997_0_1	NA	2020-03-01	E3 ubiquitin-protein ligase MARCH1	-3.20015
dd_Smed_v6_500_0_1	NA	NA	NA
dd_Smed_v6_5008_0_1	NA	OPLAH	5-oxoprolinase
dd_Smed_v6_5009_0_1	NA	VPS25	Vacuolar protein-sorting-associated protein 25
dd_Smed_v6_5016_0_1	NA	NA	NA
dd_Smed_v6_502_0_1	NA	RMDN1	Regulator of microtubule dynamics protein 1	-3.01398
dd_Smed_v6_5021_0_1	NA	NA	NA
dd_Smed_v6_5049_0_1	NA	RAB6A	Ras-related protein Rab-6A
dd_Smed_v6_5056_0_1	NA	NA	NA
dd_Smed_v6_50564_0_1	NA	NA	NA
dd_Smed_v6_5067_0_1	NA	NA	NA
dd_Smed_v6_5075_0_1	NA	NA	NA
dd_Smed_v6_5083_0_1	NA	ATG7	Ubiquitin-like modifier-activating enzyme ATG7
dd_Smed_v6_509_0_1	NA	COX7C	Cytochrome c oxidase subunit 7C, mitochondrial
dd_Smed_v6_5091_0_1	NA	NA	NA
dd_Smed_v6_5093_0_1	NA	NA	NA
dd_Smed_v6_5114_0_1	NA	UBA52	Ubiquitin A-52 residue ribosomal protein fusion product 1
dd_Smed_v6_5121_0_1	NA	ATP11B	Probable phospholipid-transporting ATPase IF	down
dd_Smed_v6_5125_0_1	NA	SLC47A2	Multidrug and toxin extrusion protein 2	-5.59215
dd_Smed_v6_5135_0_1	NA	PPP1R2	Protein phosphatase inhibitor 2
dd_Smed_v6_5138_0_1	NA	MAP3K3	Mitogen-activated protein kinase kinase kinase 3	-3.83103
dd_Smed_v6_5143_0_1	NA	ADAM9	Disintegrin and metalloproteinase domain-containing protein 9
dd_Smed_v6_5148_0_1	NA	PM20D2	Peptidase M20 domain-containing protein 2	-5.08085
dd_Smed_v6_5158_0_1	NA	ESYT2	Extended synaptotagmin-2
dd_Smed_v6_5161_0_1	NA	NA	NA
dd_Smed_v6_5166_0_1	NA	CSK	Tyrosine-protein kinase CSK
dd_Smed_v6_5175_0_1	NA	-	Niemann-Pick disease, type C1 variant
dd_Smed_v6_5177_0_1	zfp64	ZFP64	Zinc finger protein 64 homolog, isoforms 1 and 2
dd_Smed_v6_5184_0_1	NA	BLOC1S4	Biogenesis of lysosome-related organelles complex 1 subunit 4
dd_Smed_v6_5186_0_1	NA	TBCEL	Tubulin-specific chaperone cofactor E-like protein
dd_Smed_v6_5189_0_1	NA	TNFAIP8L2	Tumor necrosis factor alpha-induced protein 8-like protein 2
dd_Smed_v6_5192_0_1	NA	PAK1	Serine/threonine-protein kinase PAK 1	-3.27022
dd_Smed_v6_5195_0_1	NA	MARK3	MAP/microtubule affinity-regulating kinase 3
dd_Smed_v6_5212_0_1	NA	SOS2	Son of sevenless homolog 2	-4.70156
dd_Smed_v6_5213_0_1	NA	SNX30	Sorting nexin-30	-2.57085
dd_Smed_v6_522_0_1	NA	RALA	Ras-related protein Ral-A
dd_Smed_v6_5220_0_1	NA	AMDHD1	Probable imidazolonepropionase	-5.42942
dd_Smed_v6_5229_0_1	NA	PANK2	Pantothenate kinase 2, mitochondrial
dd_Smed_v6_5238_0_1	NA	FLVCR2	Feline leukemia virus subgroup C receptor-related protein 2
dd_Smed_v6_5241_0_1	NA	TSPAN6	Tetraspanin-6	-3.11153
dd_Smed_v6_5247_0_1	NA	ALOX12B	Arachidonate 12-lipoxygenase, 12R-type
dd_Smed_v6_5254_0_1	NA	TRAF3	TNF receptor-associated factor 3	-2.81344
dd_Smed_v6_526_0_1	NA	AHCY	Adenosylhomocysteinase
dd_Smed_v6_5263_0_1	NA	FAM46A	Protein FAM46A
dd_Smed_v6_5267_0_1	NA	SNX30	Sorting nexin-30	-2.57085
dd_Smed_v6_5274_0_1	NA	WDR13	WD repeat-containing protein 13	-4.53992
dd_Smed_v6_5287_0_1	NA	MPP6	MAGUK p55 subfamily member 6	-2.80074
dd_Smed_v6_5298_0_1	NA	NA	NA
dd_Smed_v6_5303_0_1	NA	ANK1	Ankyrin-1	-2.72109
dd_Smed_v6_53071_0_1	NA	NA	NA
dd_Smed_v6_5314_0_1	NA	ARFGEF2	Brefeldin A-inhibited guanine nucleotide-exchange protein 2
dd_Smed_v6_5330_0_1	NA	KY	Kyphoscoliosis peptidase
dd_Smed_v6_5339_0_1	NA	NA	NA
dd_Smed_v6_5342_0_1	NA	RBCK1	RanBP-type and C3HC4-type zinc finger-containing protein 1	-3.21716
dd_Smed_v6_5344_0_1	cyp2f2	CYP2F1	Cytochrome P450 2F1
dd_Smed_v6_5348_0_1	NA	BDH1	D-beta-hydroxybutyrate dehydrogenase, mitochondrial
dd_Smed_v6_5368_0_1	NA	MAP3K6	Mitogen-activated protein kinase kinase kinase 6
dd_Smed_v6_5369_0_1	NA	ATG9A	Autophagy-related protein 9A
dd_Smed_v6_5388_0_1	NA	NA	NA
dd_Smed_v6_5392_0_1	NA	MGAM	Maltase-glucoamylase, intestinal
dd_Smed_v6_54_0_1	NA	NA	NA
dd_Smed_v6_540_0_1	NA	NA	NA
dd_Smed_v6_5400_0_1	NA	CCDC22	Coiled-coil domain-containing protein 22	-2.84896
dd_Smed_v6_5408_0_1	NA	METTL27	Methyltransferase-like protein 27	-2.73727
dd_Smed_v6_5416_0_1	NA	ZFYVE21	Zinc finger FYVE domain-containing protein 21
dd_Smed_v6_542_0_1	NA	POR	NADPH--cytochrome P450 reductase
dd_Smed_v6_5420_0_1	NA	NA	NA
dd_Smed_v6_5423_0_1	NA	OSBPL6	Oxysterol-binding protein-related protein 6
dd_Smed_v6_5432_0_1	NA	LRSAM1	E3 ubiquitin-protein ligase LRSAM1
dd_Smed_v6_5433_0_1	NA	NA	NA
dd_Smed_v6_5445_0_1	NA	NA	NA
dd_Smed_v6_545_0_1	vha-10	ATP6V1G2	V-type proton ATPase subunit G 2
dd_Smed_v6_5458_0_1	NA	METTL27	Methyltransferase-like protein 27	-2.73727
dd_Smed_v6_5459_0_1	NA	OMA1	Metalloendopeptidase OMA1, mitochondrial
dd_Smed_v6_5460_0_1	NA	TRAF3	TNF receptor-associated factor 3	-2.49062
dd_Smed_v6_5462_0_1	NA	NA	NA
dd_Smed_v6_5472_0_1	NA	NA	NA
dd_Smed_v6_5473_0_1	NA	RNF123	E3 ubiquitin-protein ligase RNF123	-2.91947
dd_Smed_v6_5476_0_1	NA	SLC13A3	Solute carrier family 13 member 3	-3.34184
dd_Smed_v6_5480_0_1	NA	NA	NA
dd_Smed_v6_5510_0_1	NA	TRAF3	TNF receptor-associated factor 3	-3.47534
dd_Smed_v6_5526_0_1	NA	PQLC2	Lysosomal amino acid transporter 1 homolog	-3.62804
dd_Smed_v6_5528_0_1	NA	SLC46A1	Proton-coupled folate transporter
dd_Smed_v6_553_0_1	NA	HDLBP	Vigilin	-3.64167
dd_Smed_v6_5530_0_1	NA	NA	NA
dd_Smed_v6_5533_0_1	NA	C16orf62	UPF0505 protein C16orf62
dd_Smed_v6_5546_0_1	NA	SLC52A3	Solute carrier family 52, riboflavin transporter, member 3
dd_Smed_v6_5549_0_1	NA	NA	NA
dd_Smed_v6_555_0_1	NA	SH3D19	SH3 domain-containing protein 19
dd_Smed_v6_5552_0_1	NA	NA	NA
dd_Smed_v6_5553_0_1	NA	NA	NA
dd_Smed_v6_5559_0_1	NA	RALGPS1	Ras-specific guanine nucleotide-releasing factor RalGPS1
dd_Smed_v6_5564_0_1	NA	NA	NA
dd_Smed_v6_5578_0_1	NA	YTHDF2	YTH domain-containing family protein 2	-2.75076
dd_Smed_v6_5583_0_1	NA	STK24	Epididymis secretory protein Li 95
dd_Smed_v6_5595_0_1	NA	NA	NA
dd_Smed_v6_5599_0_1	NA	TTC7B	Tetratricopeptide repeat protein 7B	-3.79332
dd_Smed_v6_56_0_1	NA	HSP90AA1	Heat shock protein HSP 90-alpha
dd_Smed_v6_5606_0_1	NA	NA	NA
dd_Smed_v6_5625_0_1	NA	CYLD	Ubiquitin carboxyl-terminal hydrolase CYLD	-3.80678
dd_Smed_v6_564_0_1	ponzr2	CNFN	Cornifelin	down
dd_Smed_v6_5643_0_1	NA	AGPAT3	1-acyl-sn-glycerol-3-phosphate acyltransferase gamma
dd_Smed_v6_5653_0_1	NA	RRAGD	Ras-related GTP-binding protein D
dd_Smed_v6_5658_0_1	NA	RPS6KB1	Ribosomal protein S6 kinase beta-1	-3.83103
dd_Smed_v6_5660_0_1	NA	SLC9A1	Sodium/hydrogen exchanger 1	-4.55243
dd_Smed_v6_5664_0_1	NA	NA	NA
dd_Smed_v6_567_0_1	NA	CYB5A	Cytochrome b5	-3.99036
dd_Smed_v6_5670_0_1	NA	HUNK	Hormonally up-regulated neu tumor-associated kinase	-3.11447
dd_Smed_v6_5671_0_1	NA	MTTP	Microsomal triglyceride transfer protein large subunit	-4.484
dd_Smed_v6_5686_0_1	NA	AMACR	Alpha-methylacyl-CoA racemase
dd_Smed_v6_5689_0_1	NA	TRAF3	TNF receptor-associated factor 3	-4.33976
dd_Smed_v6_5691_0_1	NA	RANBP2	E3 SUMO-protein ligase RanBP2	-3.12583
dd_Smed_v6_5696_0_1	NA	MPDU1	Mannose-P-dolichol utilization defect 1 protein	-3.40085
dd_Smed_v6_5699_0_1	rush	PLEKHF2	Pleckstrin homology domain-containing family F member 2	-3.81111
dd_Smed_v6_5702_0_1	NA	SLC39A1	Zinc transporter ZIP1	-2.53042
dd_Smed_v6_5715_0_1	NA	TRAF6	TNF receptor-associated factor 6	down
dd_Smed_v6_5719_0_1	NA	CAPN9	Calpain-9
dd_Smed_v6_5726_0_1	NA	DAO	D-amino-acid oxidase
dd_Smed_v6_5733_0_1	NA	PTPRQ	Phosphatidylinositol phosphatase PTPRQ
dd_Smed_v6_5734_0_1	NA	POLG	DNA polymerase subunit gamma-1
dd_Smed_v6_5751_0_1	NA	RGS8	Regulator of G-protein signaling 8	-2.86161
dd_Smed_v6_576_0_1	NA	HEXB	Beta-hexosaminidase subunit beta	-3.33262
dd_Smed_v6_5769_0_1	NA	NA	NA
dd_Smed_v6_5782_0_1	NA	RBCK1	RanBP-type and C3HC4-type zinc finger-containing protein 1	-3.21716
dd_Smed_v6_5786_0_1	NA	SBSPON	Somatomedin-B and thrombospondin type-1 domain-containing protein
dd_Smed_v6_5787_0_1	aldh1l2	ALDH1L2	Mitochondrial 10-formyltetrahydrofolate dehydrogenase
dd_Smed_v6_5790_0_1	NA	EIF4E	Eukaryotic translation initiation factor 4E	-3.18776
dd_Smed_v6_58_0_1	colec11	COLEC11	Collectin-11	-2.89171
dd_Smed_v6_5800_0_1	NA	OCA2	P protein	-2.71146
dd_Smed_v6_581_0_1	NA	PPP6C	Serine/threonine-protein phosphatase 6 catalytic subunit
dd_Smed_v6_5810_0_1	NA	NA	NA
dd_Smed_v6_5815_0_1	NA	VPS39	Vam6/Vps39-like protein
dd_Smed_v6_583_0_1	NA	NA	NA
dd_Smed_v6_5839_0_1	NA	NA	NA
dd_Smed_v6_5845_0_1	NA	ATXN7L3	Ataxin-7-like protein 3
dd_Smed_v6_5857_0_1	NA	PPP2R2A	Serine/threonine-protein phosphatase 2A 55 kDa regulatory subunit B alpha isoform	-2.95048
dd_Smed_v6_5867_0_1	NA	HSD17B4	Peroxisomal multifunctional enzyme type 2
dd_Smed_v6_5872_0_1	NA	NUDT16	U8 snoRNA-decapping enzyme	-2.58055
dd_Smed_v6_5881_0_1	NA	NA	NA
dd_Smed_v6_5883_0_1	NA	RADIL	Ras-associating and dilute domain-containing protein
dd_Smed_v6_5886_0_1	NA	CYB5D2	Neuferricin
dd_Smed_v6_5888_0_1	NA	-	Mucolipin 1 variant
dd_Smed_v6_5902_0_1	NA	CYP3A43/CYP3A4	Cytochrome P450	-2.40902
dd_Smed_v6_5922_0_1	NA	RAC1	Ras-related C3 botulinum toxin substrate 1
dd_Smed_v6_5926_0_1	NA	NA	NA
dd_Smed_v6_5932_0_1	NA	MFN2	Mitofusin-2	-4.22499
dd_Smed_v6_5937_0_1	NA	NA	NA
dd_Smed_v6_5939_0_1	NA	HIP1	Huntingtin-interacting protein 1
dd_Smed_v6_5946_0_1	NA	SYNGR2	Synaptogyrin-2
dd_Smed_v6_5948_0_1	NA	LAMTOR4	Ragulator complex protein LAMTOR4
dd_Smed_v6_5951_0_1	NA	NA	NA
dd_Smed_v6_5954_0_1	NA	SLC31A1	High affinity copper uptake protein 1
dd_Smed_v6_5961_0_1	NA	RABEP1	Rab GTPase-binding effector protein 1
dd_Smed_v6_597_0_1	NA	NA	NA
dd_Smed_v6_5975_0_1	NA	PPP2R2D	Serine/threonine-protein phosphatase 2A 55 kDa regulatory subunit B delta isoform	-2.95048
dd_Smed_v6_5977_0_1	NA	NUP133	Nuclear pore complex protein Nup133	-2.73553
dd_Smed_v6_5978_0_1	nfat5	NFAT5	Nuclear factor of activated T-cells 5
dd_Smed_v6_5986_0_1	NA	HPS5	Hermansky-Pudlak syndrome 5 protein
dd_Smed_v6_5993_0_1	NA	NA	NA
dd_Smed_v6_6018_0_1	NA	NA	NA
dd_Smed_v6_602_0_1	NA	NPC2	Epididymal secretory protein E1	-2.87864
dd_Smed_v6_6021_0_1	NA	GLOD4	Glyoxalase domain-containing protein 4
dd_Smed_v6_6023_0_1	NA	MORN4	MORN repeat-containing protein 4
dd_Smed_v6_6026_0_1	NA	TAZ	Tafazzin
dd_Smed_v6_603_0_1	calm3	CALM1	Calmodulin 1 (Phosphorylase kinase, delta), isoform CRA_a	-2.7624
dd_Smed_v6_6036_0_1	NA	TEP1	Telomerase protein component 1
dd_Smed_v6_6038_0_1	NA	XPNPEP3	Probable Xaa-Pro aminopeptidase 3
dd_Smed_v6_6039_0_1	NA	CSK	Tyrosine-protein kinase CSK
dd_Smed_v6_6044_0_1	NA	GRTP1	Growth hormone-regulated TBC protein 1	down
dd_Smed_v6_6045_0_1	NA	LNP	Protein lunapark
dd_Smed_v6_6051_0_1	NA	FAM109A	Sesquipedalian-1
dd_Smed_v6_6053_1_1	NA	NA	NA
dd_Smed_v6_6054_0_1	NA	TRAF6	TNF receptor-associated factor 6	down
dd_Smed_v6_6055_0_1	NA	ATRAID	All-trans retinoic acid-induced differentiation factor
dd_Smed_v6_606_1_1	NA	PGGHG	Protein-glucosylgalactosylhydroxylysine glucosidase
dd_Smed_v6_607_0_1	NA	NA	NA
dd_Smed_v6_607_1_1	NA	TSPO	Translocator protein
dd_Smed_v6_6073_0_1	NA	ZDHHC16	Probable palmitoyltransferase ZDHHC16
dd_Smed_v6_6076_0_1	NA	NA	NA
dd_Smed_v6_6077_0_1	NA	ABHD11	Protein ABHD11
dd_Smed_v6_608_0_1	NA	NA	NA
dd_Smed_v6_6093_0_1	NA	LAMB1	Laminin subunit beta-1
dd_Smed_v6_610_0_1	NA	RAC1	Ras-related C3 botulinum toxin substrate 1
dd_Smed_v6_6102_0_1	NA	PLCL2	Inactive phospholipase C-like protein 2	down
dd_Smed_v6_6105_0_1	NA	WDR7	WD repeat-containing protein 7	-4.53992
dd_Smed_v6_6107_0_1	NA	TMEM106A	Transmembrane protein 106A	-3.15417
dd_Smed_v6_611_0_1	NA	HEL70	Epididymis luminal protein 70
dd_Smed_v6_6117_0_1	NA	DOPEY1	Protein dopey-1
dd_Smed_v6_6121_0_1	NA	PANK1	Pantothenate kinase 1
dd_Smed_v6_6128_0_1	NA	RAB32	Ras-related protein Rab-32	-2.95365
dd_Smed_v6_6156_0_1	NA	DOCK1	Dedicator of cytokinesis protein 1	-3.25717
dd_Smed_v6_6159_0_1	NA	UVRAG	UV radiation resistance-associated gene protein
dd_Smed_v6_6168_0_1	NA	FNTA	Protein farnesyltransferase/geranylgeranyltransferase type-1 subunit alpha	-4.3159
dd_Smed_v6_6175_0_1	NA	WDR44	WD repeat-containing protein 44	-5.07758
dd_Smed_v6_6176_1_1	NA	PLEKHF2	Pleckstrin homology domain-containing family F member 2	-3.81111
dd_Smed_v6_619_0_1	NA	ARPC3	Actin-related protein 2/3 complex subunit 3	-3.61126
dd_Smed_v6_6200_0_1	NA	NA	NA
dd_Smed_v6_6221_0_1	NA	NA	NA
dd_Smed_v6_6224_0_1	NA	NRXN1	Neurexin-1	-5.3857
dd_Smed_v6_623_0_1	NA	ACTR2	Actin-related protein 2	-3.11582
dd_Smed_v6_6231_0_1	NA	LATS1	Serine/threonine-protein kinase LATS1
dd_Smed_v6_6236_0_1	NA	ADA	Adenosine deaminase
dd_Smed_v6_6247_0_1	NA	NA	NA
dd_Smed_v6_6249_0_1	NA	DGKB	Diacylglycerol kinase beta	-5.54655
dd_Smed_v6_6251_0_1	NA	PCDH1	Protocadherin-1	down
dd_Smed_v6_6255_0_1	NA	RHPN2	Rhophilin-2	-6.12267
dd_Smed_v6_6256_0_1	NA	CTNND2	Catenin delta-2	-2.76997
dd_Smed_v6_6268_0_1	NA	C12orf66	KICSTOR complex protein C12orf66
dd_Smed_v6_6276_0_1	NA	PTPMT1	Phosphatidylglycerophosphatase and protein-tyrosine phosphatase 1
dd_Smed_v6_6292_0_1	NA	MTHFS	5-formyltetrahydrofolate cyclo-ligase
dd_Smed_v6_63_0_1	NA	COTL1	Coactosin-like protein
dd_Smed_v6_630_0_1	NA	CHMP1B	Charged multivesicular body protein 1b	-3.01409
dd_Smed_v6_6305_0_1	NA	MFSD11	UNC93-like protein MFSD11
dd_Smed_v6_6306_0_1	NA	NA	NA
dd_Smed_v6_6309_0_1	NA	GNPTAB	N-acetylglucosamine-1-phosphotransferase subunits alpha/beta
dd_Smed_v6_6318_0_1	NA	APLP2	Amyloid-like protein 2	-2.98236
dd_Smed_v6_6319_0_1	NA	NA	NA
dd_Smed_v6_6320_0_1	NA	ARHGAP24	Rho GTPase-activating protein 24	-3.00076
dd_Smed_v6_6323_0_1	NA	NPR2	Atrial natriuretic peptide receptor 2
dd_Smed_v6_6324_0_1	NA	NA	NA
dd_Smed_v6_634_0_1	rpz4	NA	NA
dd_Smed_v6_6343_0_1	NA	NA	NA
dd_Smed_v6_6346_0_1	NA	NA	NA
dd_Smed_v6_6356_0_1	NA	CARNMT1	Carnosine N-methyltransferase
dd_Smed_v6_6359_0_1	NA	NA	NA
dd_Smed_v6_636_0_1	apob-1	APOB	Apolipoprotein B-100
dd_Smed_v6_6377_0_1	NA	AAK1	AP2-associated protein kinase 1
dd_Smed_v6_6380_0_1	NA	NA	NA
dd_Smed_v6_6387_0_1	NA	LZTR1	Leucine-zipper-like transcriptional regulator 1
dd_Smed_v6_639_2_1	NA	MAP3K3	Mitogen-activated protein kinase kinase kinase 3	-6.12267
dd_Smed_v6_6391_0_1	NA	NA	NA
dd_Smed_v6_6393_0_1	NA	ABCB1	Multidrug resistance protein 1	-5.84177
dd_Smed_v6_6401_0_1	NA	NA	NA
dd_Smed_v6_6402_0_1	NA	CAPN7	Calpain 7
dd_Smed_v6_6418_0_1	NA	UBC	Polyubiquitin-C	down
dd_Smed_v6_6427_0_1	NA	EXOC1	Exocyst complex component 1	-3.42849
dd_Smed_v6_643_0_1	NA	NAGK	N-acetyl-D-glucosamine kinase
dd_Smed_v6_6440_0_1	NA	D2HGDH	D-2-hydroxyglutarate dehydrogenase, mitochondrial
dd_Smed_v6_645_0_1	NA	ANK1	Ankyrin-1	-5.20882
dd_Smed_v6_6456_0_1	NA	PIGK	GPI-anchor transamidase	-3.37039
dd_Smed_v6_6476_0_1	NA	NEDD9	Enhancer of filamentation 1	-2.86823
dd_Smed_v6_6484_0_1	NA	FAM172A	Protein FAM172A
dd_Smed_v6_6485_0_1	NA	TRAF3	TNF receptor-associated factor 3	-2.81344
dd_Smed_v6_6494_0_1	NA	NA	NA
dd_Smed_v6_6497_0_1	NA	NA	NA
dd_Smed_v6_6504_0_1	NA	RALGAPA2	Ral GTPase-activating protein subunit alpha-2
dd_Smed_v6_6529_0_1	NA	GSS	Glutathione synthetase
dd_Smed_v6_653_0_1	NA	DUSP6	Dual specificity protein phosphatase 6	-3.89355
dd_Smed_v6_6531_0_1	NA	PSAP	Prosaposin	-2.58859
dd_Smed_v6_6537_0_1	NA	OXR1	Oxidation resistance protein 1	-3.76115
dd_Smed_v6_6544_0_1	NA	DSTYK	Dual serine/threonine and tyrosine protein kinase	-3.62386
dd_Smed_v6_6546_0_1	NA	UPRT	Uracil phosphoribosyltransferase homolog
dd_Smed_v6_6547_0_1	NA	NA	NA
dd_Smed_v6_6549_0_1	NA	NA	NA
dd_Smed_v6_6550_0_1	NA	MOGAT2	2-acylglycerol O-acyltransferase 2
dd_Smed_v6_6560_0_1	NA	NA	NA
dd_Smed_v6_6561_0_1	NA	ACSS1	Acetyl-coenzyme A synthetase 2-like, mitochondrial
dd_Smed_v6_6577_0_1	NA	DST	Dystonin
dd_Smed_v6_6578_0_1	NA	DDR2	Discoidin domain-containing receptor 2	-3.10393
dd_Smed_v6_6580_0_1	NA	NA	NA
dd_Smed_v6_6584_0_1	NA	INPP5F	Phosphatidylinositide phosphatase SAC2
dd_Smed_v6_6588_0_1	NA	RAB9B	Ras-related protein Rab-9B
dd_Smed_v6_6592_0_1	NA	NA	NA
dd_Smed_v6_66_0_1	gzmm	KLK13	Kallikrein-13	-2.2869
dd_Smed_v6_6606_1_1	NA	MAOB	Amine oxidase [flavin-containing] B	-4.9483
dd_Smed_v6_6609_0_1	NA	ABCC3	Canalicular multispecific organic anion transporter 2
dd_Smed_v6_6618_0_1	NA	FGD4	FYVE, RhoGEF and PH domain-containing protein 4
dd_Smed_v6_6619_0_1	tmc4	TMC5	Transmembrane channel-like protein 5
dd_Smed_v6_662_0_1	NA	GPX4	Phospholipid hydroperoxide glutathione peroxidase, mitochondrial
dd_Smed_v6_6627_0_1	NA	STAMBPL1	AMSH-like protease
dd_Smed_v6_6637_0_1	NA	NA	NA
dd_Smed_v6_6647_0_1	stck	LIMS1	LIM and senescent cell antigen-like-containing domain protein 1
dd_Smed_v6_6652_0_1	NA	B3GALT1	Beta-1,3-galactosyltransferase 1
dd_Smed_v6_6653_0_1	NA	NA	NA
dd_Smed_v6_6663_0_1	slc5a9	SLC5A1	Sodium/glucose cotransporter 1
dd_Smed_v6_6666_0_1	NA	CNNM2	Metal transporter CNNM2	-3.49605
dd_Smed_v6_667_0_1	NA	UBE2L3	Ubiquitin-conjugating enzyme E2 L3	-2.85862
dd_Smed_v6_6676_0_1	NA	NA	NA
dd_Smed_v6_6677_0_1	NA	FTH1	Ferritin	down
dd_Smed_v6_6678_0_1	NA	VPS11	Vacuolar protein sorting-associated protein 11 homolog	down
dd_Smed_v6_6680_0_1	NA	RMDN2	Regulator of microtubule dynamics protein 2	-3.01398
dd_Smed_v6_6683_0_1	NA	STK32B	Serine/threonine-protein kinase 32B
dd_Smed_v6_6687_0_1	NA	NA	NA
dd_Smed_v6_6691_0_1	NA	SLC15A4	Solute carrier family 15 member 4
dd_Smed_v6_670_0_1	NA	TMEM14C	Transmembrane protein 14C	-3.26202
dd_Smed_v6_6703_0_1	NA	SLC35B2	Adenosine 3'-phospho 5'-phosphosulfate transporter 1
dd_Smed_v6_6705_0_1	NA	NA	NA
dd_Smed_v6_6707_0_1	NA	NA	NA
dd_Smed_v6_6714_0_1	NA	NA	NA
dd_Smed_v6_6717_0_1	NA	ABHD13	Protein ABHD13
dd_Smed_v6_6719_0_1	NA	PLCG1	1-phosphatidylinositol 4,5-bisphosphate phosphodiesterase gamma-1
dd_Smed_v6_6722_0_1	NA	NA	NA
dd_Smed_v6_6724_0_1	NA	CRAT	Carnitine O-acetyltransferase
dd_Smed_v6_6727_0_1	mgll	MGLL	Monoglyceride lipase	-5.17355
dd_Smed_v6_6738_0_1	NA	ETNPPL	Ethanolamine-phosphate phospho-lyase
dd_Smed_v6_6739_0_1	NA	MPDZ	Multiple PDZ domain protein
dd_Smed_v6_6745_0_1	NA	GCLC	Glutamate--cysteine ligase catalytic subunit
dd_Smed_v6_6768_0_1	NA	TRAF3	TNF receptor-associated factor 3	-4.33976
dd_Smed_v6_6771_0_1	NA	NA	NA
dd_Smed_v6_6785_1_1	NA	NA	NA
dd_Smed_v6_6792_0_1	NA	SLC31A1	High affinity copper uptake protein 1
dd_Smed_v6_6793_0_1	NA	NA	NA
dd_Smed_v6_6796_0_1	NA	MGLL	Monoglyceride lipase	-4.29407
dd_Smed_v6_6799_0_1	NA	MUSK	Muscle, skeletal receptor tyrosine-protein kinase
dd_Smed_v6_6802_0_1	NA	CNP	2',3'-cyclic-nucleotide 3'-phosphodiesterase	-2.87488
dd_Smed_v6_6804_0_1	NA	NA	NA
dd_Smed_v6_6817_0_1	NA	ALG11	GDP-Man:Man(3)GlcNAc(2)-PP-Dol alpha-1,2-mannosyltransferase
dd_Smed_v6_6819_0_1	NA	A4GNT	Alpha-1,4-N-acetylglucosaminyltransferase	-5.04281
dd_Smed_v6_6825_0_1	NA	TRPM5	Transient receptor potential cation channel subfamily M member 5	down
dd_Smed_v6_6826_0_1	NA	NA	NA
dd_Smed_v6_6827_0_1	NA	ALDH9A1	4-trimethylaminobutyraldehyde dehydrogenase
dd_Smed_v6_683_0_1	NA	NA	NA
dd_Smed_v6_6831_0_1	NA	KMO	Kynurenine 3-monooxygenase
dd_Smed_v6_6833_0_1	NA	ADO	2-aminoethanethiol dioxygenase
dd_Smed_v6_6835_0_1	NA	LGR6	Leucine-rich repeat-containing G-protein coupled receptor 6
dd_Smed_v6_6837_0_1	NA	NA	NA
dd_Smed_v6_684_0_1	NA	ATP6V1B2	V-type proton ATPase subunit B, brain isoform	-3.1003
dd_Smed_v6_6843_0_1	NA	PLPP1	Phospholipid phosphatase 1	-4.68526
dd_Smed_v6_6848_0_1	NA	SLC29A1	Equilibrative nucleoside transporter 1
dd_Smed_v6_68525_0_1	NA	NA	NA
dd_Smed_v6_6853_0_1	NA	DDR1	Epithelial discoidin domain-containing receptor 1	-3.10393
dd_Smed_v6_6860_0_1	NA	NA	NA
dd_Smed_v6_6869_0_1	ptf1a	PTF1A	Pancreas transcription factor 1 subunit alpha
dd_Smed_v6_687_0_1	NA	PPP2R1A	Serine/threonine-protein phosphatase 2A 65 kDa regulatory subunit A alpha isoform	-2.95048
dd_Smed_v6_6887_0_1	NA	NRXN3	Neurexin-3
dd_Smed_v6_6888_0_1	NA	-	cDNA, FLJ96114, highly similar to Homo sapiens bromodomain and WD repeat domain containing 2 (BRWD2), mRNA
dd_Smed_v6_690_0_1	argbpip	argBPIB	ArgBPIB protein
dd_Smed_v6_6917_0_1	NA	SUSD2	Sushi domain-containing protein 2
dd_Smed_v6_6928_0_1	NA	PTPN4	Tyrosine-protein phosphatase non-receptor type 4
dd_Smed_v6_6956_0_1	NA	FPGS	Folylpolyglutamate synthase, mitochondrial
dd_Smed_v6_6967_0_1	NA	PRKG1	cGMP-dependent protein kinase 1
dd_Smed_v6_6969_0_1	NA	NA	NA
dd_Smed_v6_6980_0_1	NA	SMCR8	Guanine nucleotide exchange protein SMCR8
dd_Smed_v6_6983_0_1	NA	MAP3K3	Mitogen-activated protein kinase kinase kinase 3	-2.71356
dd_Smed_v6_699_0_1	NA	AK3	GTP:AMP phosphotransferase AK3, mitochondrial	-2.64719
dd_Smed_v6_6996_0_1	NA	PTPN2	Tyrosine-protein phosphatase non-receptor type	-2.56649
dd_Smed_v6_6998_0_1	NA	NA	NA
dd_Smed_v6_7000_0_1	NA	GGACT	Gamma-glutamylaminecyclotransferase
dd_Smed_v6_7032_0_1	NA	MAN1B1	Endoplasmic reticulum mannosyl-oligosaccharide 1,2-alpha-mannosidase
dd_Smed_v6_7035_0_1	NA	NA	NA
dd_Smed_v6_704_0_1	NA	NPC2	Epididymal secretory protein E1	-2.87864
dd_Smed_v6_7042_0_1	NA	NA	NA
dd_Smed_v6_7052_0_1	NA	RAB5B	Ras-related protein Rab-5B
dd_Smed_v6_7056_0_1	NA	ACF	Apobec-1 complementation factor, isoform CRA_b
dd_Smed_v6_7058_0_1	NA	SSH1	Protein phosphatase Slingshot homolog 1
dd_Smed_v6_7059_0_1	NA	DENND3	DENN domain-containing protein 3	-3.33532
dd_Smed_v6_7072_0_1	NA	TBC1D13	TBC1 domain family member 13	-3.21488
dd_Smed_v6_7075_0_1	NA	SLC16A12	Monocarboxylate transporter 12	down
dd_Smed_v6_7076_0_1	NA	NA	NA
dd_Smed_v6_7077_0_1	NA	MFSD12	Major facilitator superfamily domain-containing protein 12	-5.14469
dd_Smed_v6_7096_0_1	NA	LOXL2	Lysyl oxidase homolog 2
dd_Smed_v6_7098_0_1	NA	MAOB	Amine oxidase [flavin-containing] B	-4.9483
dd_Smed_v6_71_0_1	wfikkn2	APLP2	Amyloid-like protein 2	-2.98236
dd_Smed_v6_7100_0_1	NA	TMEM104	Transmembrane protein 104	-3.15417
dd_Smed_v6_7104_0_1	NA	SLC26A11	Sodium-independent sulfate anion transporter	-3.39308
dd_Smed_v6_7105_0_1	NA	SNTB1	Beta-1-syntrophin
dd_Smed_v6_7109_0_1	NA	NA	NA
dd_Smed_v6_7115_0_1	NA	NA	NA
dd_Smed_v6_7121_0_1	NA	SLC24A5	Sodium/potassium/calcium exchanger 5	down
dd_Smed_v6_713_0_1	NA	NA	NA
dd_Smed_v6_7138_0_1	NA	NA	NA
dd_Smed_v6_7140_0_1	NA	NA	NA
dd_Smed_v6_7143_0_1	NA	IPPK	Inositol-pentakisphosphate 2-kinase
dd_Smed_v6_7144_0_1	NA	L3HYPDH	Trans-3-hydroxy-L-proline dehydratase
dd_Smed_v6_7147_0_1	NA	APRT	Adenine phosphoribosyltransferase
dd_Smed_v6_7149_0_1	NA	NA	NA
dd_Smed_v6_7156_0_1	NA	NA	NA
dd_Smed_v6_7158_0_1	NA	MAP3K3	Mitogen-activated protein kinase kinase kinase 3	-3.27395
dd_Smed_v6_7165_0_1	NA	NA	NA
dd_Smed_v6_7171_0_1	NA	NA	NA
dd_Smed_v6_7179_0_1	NA	DNMBP	Dynamin-binding protein	-4.57508
dd_Smed_v6_7183_0_1	NA	RABGGTA	Geranylgeranyl transferase type-2 subunit alpha	-4.10812
dd_Smed_v6_7184_0_1	NA	B4GALT2	Beta-1,4-galactosyltransferase 2	-4.72089
dd_Smed_v6_7198_0_1	NA	KDSR	3-ketodihydrosphingosine reductase
dd_Smed_v6_72_0_1	novel	NA	NA
dd_Smed_v6_7200_0_1	NA	SAT2	Diamine acetyltransferase 2
dd_Smed_v6_7205_0_1	NA	CIB2	Calcium and integrin-binding family member 2
dd_Smed_v6_7206_0_1	NA	FAR1	Fatty acyl-CoA reductase 1
dd_Smed_v6_7217_0_1	NA	NA	NA
dd_Smed_v6_7218_0_1	NA	NA	NA
dd_Smed_v6_722_0_1	NA	LAMP1	Lysosome-associated membrane glycoprotein 1	-2.87766
dd_Smed_v6_7220_0_1	NA	TPPP3	Tubulin polymerization-promoting protein family member 3	-6.1282
dd_Smed_v6_7229_0_1	NA	SLC8A1	Sodium/calcium exchanger 1	-6.01916
dd_Smed_v6_7235_0_1	NA	GGPS1	Geranylgeranyl pyrophosphate synthase
dd_Smed_v6_7241_0_1	NA	SLC47A1	Multidrug and toxin extrusion protein 1	down
dd_Smed_v6_725_0_1	NA	HADH	Hydroxyacyl-coenzyme A dehydrogenase, mitochondrial
dd_Smed_v6_7256_0_1	NA	NA	NA
dd_Smed_v6_726_0_1	NA	NA	NA
dd_Smed_v6_7286_0_1	NA	PLA2G15	Group XV phospholipase A2
dd_Smed_v6_7289_0_1	NA	NA	NA
dd_Smed_v6_7295_0_1	NA	PANK1	Pantothenate kinase 1
dd_Smed_v6_73_0_1	npc2	NPC2	Epididymal secretory protein E1	-2.87864
dd_Smed_v6_7301_0_1	NA	RGR	RPE-retinal G protein-coupled receptor
dd_Smed_v6_7313_0_1	NA	NA	NA
dd_Smed_v6_7334_0_1	NA	PCBP3	Poly(rC)-binding protein 3
dd_Smed_v6_7336_0_1	NA	FIG4	Polyphosphoinositide phosphatase
dd_Smed_v6_7337_0_1	NA	VPS33B	Vacuolar protein sorting-associated protein 33B	-4.30358
dd_Smed_v6_7338_0_1	NA	NA	NA
dd_Smed_v6_7339_0_1	NA	NA	NA
dd_Smed_v6_734_0_1	NA	NA	NA
dd_Smed_v6_7343_0_1	NA	LRRK2	Leucine-rich repeat kinase 2
dd_Smed_v6_7354_0_1	NA	CLN3	Battenin
dd_Smed_v6_7359_0_1	NA	LAMC1	Laminin subunit gamma-1
dd_Smed_v6_736_0_1	NA	NA	NA
dd_Smed_v6_7367_0_1	NA	PI4K2A	Phosphatidylinositol 4-kinase type 2-alpha	-5.91622
dd_Smed_v6_7369_0_1	NA	GLTPD1	Ceramide-1-phosphate transfer protein	-4.40042
dd_Smed_v6_7384_0_1	NA	DHTKD1	Probable 2-oxoglutarate dehydrogenase E1 component DHKTD1, mitochondrial
dd_Smed_v6_7388_0_1	NA	TSTD1	Thiosulfate sulfurtransferase/rhodanese-like domain-containing protein 1
dd_Smed_v6_7407_0_1	NA	ZFYVE1	Zinc finger FYVE domain-containing protein 1
dd_Smed_v6_741_1_1	NA	FH	Fumarate hydratase, mitochondrial	-3.02109
dd_Smed_v6_7411_0_1	NA	NA	NA
dd_Smed_v6_743_0_1	NA	-	PLAC8 protein	-2.89395
dd_Smed_v6_7447_0_1	NA	SLC6A1	Sodium- and chloride-dependent GABA transporter 1
dd_Smed_v6_7457_0_1	NA	USP37	Ubiquitin carboxyl-terminal hydrolase 37	-2.77149
dd_Smed_v6_7460_0_1	NA	MAP3K3	Mitogen-activated protein kinase kinase kinase 3	-3.83103
dd_Smed_v6_7461_0_1	NA	NA	NA
dd_Smed_v6_7470_0_1	gli-1	GLI3	Transcriptional activator GLI3
dd_Smed_v6_7474_0_1	NA	SLC16A4	Monocarboxylate transporter 5
dd_Smed_v6_7485_0_1	NA	NA	NA
dd_Smed_v6_7487_0_1	NA	RNF31	E3 ubiquitin-protein ligase RNF31	-3.68182
dd_Smed_v6_749_0_1	NA	PLS3	Plastin-3
dd_Smed_v6_75_0_1	cg3884	NA	NA
dd_Smed_v6_7505_0_1	NA	NA	NA
dd_Smed_v6_7521_0_1	NA	ZDHHC24	Probable palmitoyltransferase ZDHHC24
dd_Smed_v6_7534_0_1	NA	NA	NA
dd_Smed_v6_7541_0_1	cg4386	TMPRSS15	Enteropeptidase
dd_Smed_v6_7542_0_1	NA	NA	NA
dd_Smed_v6_7543_0_1	NA	UGCG	Ceramide glucosyltransferase	-3.40408
dd_Smed_v6_7565_0_1	NA	PRKAG3	5'-AMP-activated protein kinase subunit gamma-3	-3.24189
dd_Smed_v6_7577_0_1	NA	PDE4D	Phosphodiesterase
dd_Smed_v6_7587_0_1	NA	CBR4	Carbonyl reductase family member 4
dd_Smed_v6_7590_0_1	NA	NA	NA
dd_Smed_v6_7593_0_1	NA	NOL4L	Nucleolar protein 4-like
dd_Smed_v6_762_0_1	NA	GLIPR2	Golgi-associated plant pathogenesis-related protein 1	-2.92603
dd_Smed_v6_7643_0_1	NA	DHDH	Trans-1,2-dihydrobenzene-1,2-diol dehydrogenase
dd_Smed_v6_7655_0_1	NA	NA	NA
dd_Smed_v6_7676_0_1	NA	CYP46A1	Cholesterol 24-hydroxylase
dd_Smed_v6_7677_0_1	NA	HEL-S-283	Epididymis secretory protein Li 283
dd_Smed_v6_7683_0_1	NA	NA	NA
dd_Smed_v6_7693_0_1	NA	NA	NA
dd_Smed_v6_7699_0_1	NA	NA	NA
dd_Smed_v6_7720_0_1	NA	ZDHHC5	Palmitoyltransferase ZDHHC5
dd_Smed_v6_7725_0_1	NA	PIK3C2B	Phosphatidylinositol 4-phosphate 3-kinase C2 domain-containing subunit beta
dd_Smed_v6_7733_0_1	NA	CALCR	Calcitonin receptor
dd_Smed_v6_7746_0_1	NA	ANK1	Ankyrin-1
dd_Smed_v6_7748_0_1	NA	NA	NA
dd_Smed_v6_7766_0_1	sult1c4	SULT1C4	Sulfotransferase 1C4
dd_Smed_v6_777_0_1	NA	NA	NA
dd_Smed_v6_7775_0_1	NA	TBC1D23	TBC1 domain family member 23	-3.21488
dd_Smed_v6_7779_0_1	NA	WWP2	NEDD4-like E3 ubiquitin-protein ligase WWP2
dd_Smed_v6_7784_0_1	NA	TRPM2	Transient receptor potential cation channel subfamily M member 2	down
dd_Smed_v6_7790_0_1	NA	NA	NA
dd_Smed_v6_7794_0_1	NA	ZFYVE26	Zinc finger FYVE domain-containing protein 26
dd_Smed_v6_7796_0_1	NA	NA	NA
dd_Smed_v6_7799_1_1	NA	NA	NA
dd_Smed_v6_7802_0_1	NA	NA	NA
dd_Smed_v6_7803_0_1	NA	ABHD12	Monoacylglycerol lipase ABHD12
dd_Smed_v6_781_0_1	NA	ARPC5L	Actin-related protein 2/3 complex subunit 5-like protein	-3.61126
dd_Smed_v6_7819_0_1	NA	LYST	Lysosomal-trafficking regulator
dd_Smed_v6_783_0_1	NA	NA	NA
dd_Smed_v6_7833_0_1	NA	PHLDB2	Pleckstrin homology-like domain family B member 2
dd_Smed_v6_7835_0_1	NA	ELOVL4	Elongation of very long chain fatty acids protein 4	-4.29945
dd_Smed_v6_784_0_1	cuc-1	ATOX1	Copper transport protein ATOX1	-3.31559
dd_Smed_v6_7847_0_1	NA	SLC46A3	Solute carrier family 46 member 3
dd_Smed_v6_785_0_1	NA	CTSA	Lysosomal protective protein	-3.25873
dd_Smed_v6_7852_0_1	NA	CLN8	Protein CLN8	-2.8752
dd_Smed_v6_786_0_1	NA	PNP	Purine nucleoside phosphorylase	-3.0469
dd_Smed_v6_7861_0_1	NA	ANK3	Ankyrin-3
dd_Smed_v6_7863_0_1	meis1a	MEIS2	Homeobox protein Meis2
dd_Smed_v6_787_0_1	NA	PAK4	Serine/threonine-protein kinase PAK 4
dd_Smed_v6_7876_0_1	NA	NA	NA
dd_Smed_v6_7890_0_1	NA	NA	NA
dd_Smed_v6_7893_0_1	NA	NA	NA
dd_Smed_v6_7894_0_1	NA	NA	NA
dd_Smed_v6_79_0_1	si:dkey-241	SFTPA1	Pulmonary surfactant-associated protein A1
dd_Smed_v6_790_0_1	NA	PRSS12	Neurotrypsin	-2.92445
dd_Smed_v6_7907_1_1	NA	NA	NA
dd_Smed_v6_7909_0_1	NA	NA	NA
dd_Smed_v6_7913_0_1	NA	TPK1	Thiamin pyrophosphokinase 1
dd_Smed_v6_7924_0_1	NA	LAMA1	Laminin subunit alpha-1
dd_Smed_v6_7935_0_1	NA	NA	NA
dd_Smed_v6_7938_0_1	mitf	MITF	Microphthalmia-associated transcription factor
dd_Smed_v6_7943_0_1	NA	PGAP1	GPI inositol-deacylase
dd_Smed_v6_7946_0_1	NA	NLGN4X	Neuroligin-4, X-linked
dd_Smed_v6_7950_0_1	NA	TRAF3	TNF receptor-associated factor 3	-2.81344
dd_Smed_v6_7964_0_1	NA	ACTN2	Alpha-actinin-2
dd_Smed_v6_797_0_1	NA	NA	NA
dd_Smed_v6_7970_0_1	NA	PIGG	GPI ethanolamine phosphate transferase 2
dd_Smed_v6_7979_0_1	NA	RAB43	Ras-related protein Rab-43
dd_Smed_v6_7988_0_1	NA	DDR2	Discoidin domain-containing receptor 2	-3.10393
dd_Smed_v6_8_0_1	NA	NA	NA
dd_Smed_v6_8002_0_1	NA	LPIN3	Phosphatidate phosphatase LPIN3	-3.60709
dd_Smed_v6_8006_0_1	NA	NA	NA
dd_Smed_v6_8029_0_1	NA	PHYHD1	Phytanoyl-CoA dioxygenase domain-containing protein 1
dd_Smed_v6_8071_0_1	NA	MPC2	Mitochondrial pyruvate carrier 2
dd_Smed_v6_8073_0_1	NA	BEST1	Bestrophin-1	-3.4833
dd_Smed_v6_81_0_1	ctsb	CTSB	Cathepsin B	-2.78158
dd_Smed_v6_8101_0_1	NA	EZR	Ezrin
dd_Smed_v6_8116_0_1	NA	APEH	Acylamino-acid-releasing enzyme
dd_Smed_v6_8118_0_1	NA	COQ3	Ubiquinone biosynthesis O-methyltransferase, mitochondrial
dd_Smed_v6_8124_0_1	NA	ACVR2A	Activin receptor type-2A	-3.17271
dd_Smed_v6_8150_0_1	NA	SLC26A5	Prestin
dd_Smed_v6_8166_0_1	NA	PEX12	Peroxisome assembly protein 12
dd_Smed_v6_8170_0_1	NA	RIPK4	Receptor-interacting serine/threonine-protein kinase 4	-2.81406
dd_Smed_v6_8176_0_1	helz2	HELZ2	Helicase with zinc finger domain 2
dd_Smed_v6_819_0_1	NA	NDUFB2	NADH dehydrogenase [ubiquinone] 1 beta subcomplex subunit 2, mitochondrial	-3.0579
dd_Smed_v6_8190_0_1	lhx2b	LHX9	LIM/homeobox protein Lhx9	-5.22958
dd_Smed_v6_8201_0_1	NA	DNAH10	Dynein heavy chain 10, axonemal	down
dd_Smed_v6_8228_0_1	NA	TRAF2	TNF receptor-associated factor 2	-3.99512
dd_Smed_v6_8244_0_1	NA	SLC2A1	Solute carrier family 2, facilitated glucose transporter member 1	-3.97641
dd_Smed_v6_825_0_1	NA	TIMM23	Mitochondrial import inner membrane translocase subunit Tim23	-2.71075
dd_Smed_v6_8252_0_1	lhx1	LHX1	LIM/homeobox protein Lhx1	-5.22958
dd_Smed_v6_8255_0_1	NA	ARAP1	Arf-GAP with Rho-GAP domain, ANK repeat and PH domain-containing protein 1
dd_Smed_v6_8266_0_1	NA	NA	NA
dd_Smed_v6_827_0_1	rpz4	NA	NA
dd_Smed_v6_8282_0_1	NA	AFMID	Kynurenine formamidase
dd_Smed_v6_8300_0_1	NA	CDKL3	Cyclin-dependent kinase-like 3
dd_Smed_v6_8301_0_1	NA	NA	NA
dd_Smed_v6_8303_0_1	NA	NUMB	Protein numb homolog
dd_Smed_v6_8310_0_1	NA	FGFRL1	Fibroblast growth factor receptor-like 1
dd_Smed_v6_8317_0_1	NA	NA	NA
dd_Smed_v6_8326_0_1	NA	CASP3	Caspase-3
dd_Smed_v6_8328_0_1	NA	PLA2G15	Group XV phospholipase A2
dd_Smed_v6_833_0_1	NA	ATP6V0A1	V-type proton ATPase 116 kDa subunit a isoform 1	-2.50372
dd_Smed_v6_8331_0_1	NA	NA	NA
dd_Smed_v6_8333_0_1	NA	TPCN1	Two pore calcium channel protein 1	-4.08795
dd_Smed_v6_8335_0_1	NA	SLC47A1	Multidrug and toxin extrusion protein 1	down
dd_Smed_v6_8336_0_1	NA	CELSR1	Cadherin EGF LAG seven-pass G-type receptor 1	down
dd_Smed_v6_8349_0_1	NA	PLA2G6	85/88 kDa calcium-independent phospholipase A2
dd_Smed_v6_835_0_1	NA	SNX2	Sorting nexin-2	-2.71977
dd_Smed_v6_8366_0_1	NA	NA	NA
dd_Smed_v6_8373_0_1	NA	FLVCR2	Feline leukemia virus subgroup C receptor-related protein 2	-3.82648
dd_Smed_v6_8378_0_1	NA	BSCL2	Seipin
dd_Smed_v6_8379_0_1	NA	NA	NA
dd_Smed_v6_838_0_1	NA	REEP6	Receptor expression-enhancing protein 6	-2.92534
dd_Smed_v6_8382_0_1	NA	TRPM3	Transient receptor potential cation channel subfamily M member 3	down
dd_Smed_v6_8385_0_1	NA	NA	NA
dd_Smed_v6_8403_0_1	NA	SMPDL3B	Acid sphingomyelinase-like phosphodiesterase 3b
dd_Smed_v6_8406_0_1	pcsk1	PCSK1	Neuroendocrine convertase 1	-2.79942
dd_Smed_v6_8407_0_1	NA	SIDT2	SID1 transmembrane family member 2
dd_Smed_v6_8422_0_1	NA	FUCA2	Plasma alpha-L-fucosidase	-2.92667
dd_Smed_v6_8424_0_1	NA	NA	NA
dd_Smed_v6_8443_0_1	NA	TP53BP2	TP53BP2 protein
dd_Smed_v6_8448_0_1	NA	CD163	Scavenger receptor cysteine-rich type 1 protein M130
dd_Smed_v6_845_0_1	NA	COX4I2	Cytochrome c oxidase subunit 4 isoform 2, mitochondrial	-3.24049
dd_Smed_v6_8479_0_1	NA	NA	NA
dd_Smed_v6_8505_0_1	pgrp-le	PGLYRP1	Peptidoglycan recognition protein 1
dd_Smed_v6_8509_0_1	NA	NA	NA
dd_Smed_v6_8535_0_1	NA	ABCD4	ATP-binding cassette sub-family D member 4
dd_Smed_v6_8560_0_1	NA	ABCG2	ATP-binding cassette sub-family G member 2
dd_Smed_v6_8575_0_1	NA	HELZ	Probable helicase with zinc finger domain
dd_Smed_v6_859_0_1	cat	CAT	Catalase
dd_Smed_v6_8591_0_1	NA	DHCR7	7-dehydrocholesterol reductase	-5.13005
dd_Smed_v6_862_0_1	NA	NA	NA
dd_Smed_v6_8621_0_1	NA	CDC42	Cell division control protein 42 homolog
dd_Smed_v6_863_0_1	NA	HADHA	Trifunctional enzyme subunit alpha, mitochondrial
dd_Smed_v6_864_0_1	NA	ARF1	ADP-ribosylation factor 1	-2.70104
dd_Smed_v6_8642_0_1	rgl1	RGL1	Ral guanine nucleotide dissociation stimulator-like 1
dd_Smed_v6_8649_0_1	NA	NA	NA
dd_Smed_v6_8653_0_1	NA	DNM2	Dynamin-2	-3.14276
dd_Smed_v6_867_0_1	NA	RAB11B	Ras-related protein Rab-11B
dd_Smed_v6_8683_0_1	NA	SLC36A2	Proton-coupled amino acid transporter 2
dd_Smed_v6_8687_0_1	NA	GLT1D1	Glycosyltransferase 1 domain-containing protein 1
dd_Smed_v6_869_0_1	NA	TYMP	Thymidine phosphorylase	-2.84087
dd_Smed_v6_87_0_1	NA	NA	NA
dd_Smed_v6_870_0_1	NA	FKBP15	FK506-binding protein 15	-2.63229
dd_Smed_v6_8709_0_1	NA	GAS2L1	GAS2-like protein 1
dd_Smed_v6_8719_0_1	NA	NA	NA
dd_Smed_v6_8735_0_1	NA	TBCK	TBC domain-containing protein kinase-like protein	-3.83829
dd_Smed_v6_8745_0_1	NA	TJP1	Tight junction protein 1 (Zona occludens 1), isoform CRA_a
dd_Smed_v6_8746_0_1	NA	CELA1	Chymotrypsin-like elastase family member 1	-2.83204
dd_Smed_v6_8762_0_1	NA	ZNFX1	NFX1-type zinc finger-containing protein 1	-2.58382
dd_Smed_v6_8766_0_1	NA	ACMSD	2-amino-3-carboxymuconate-6-semialdehyde decarboxylase
dd_Smed_v6_8767_0_1	NA	GRHPR	Glyoxylate reductase/hydroxypyruvate reductase
dd_Smed_v6_8771_0_1	NA	HPS4	Hermansky-Pudlak syndrome 4 protein
dd_Smed_v6_8774_0_1	NA	ORAI2	Protein orai-2
dd_Smed_v6_8779_0_1	NA	PCSK5	Proprotein convertase subtilisin/kexin type 5	-2.79942
dd_Smed_v6_878_0_1	NA	RTN4	Reticulon-4
dd_Smed_v6_8783_0_1	NA	NA	NA
dd_Smed_v6_8800_0_1	NA	STARD3	StAR-related lipid transfer protein 3	down
dd_Smed_v6_8805_0_1	NA	LCHN	Protein LCHN
dd_Smed_v6_8821_0_1	NA	NA	NA
dd_Smed_v6_8840_0_1	NA	NA	NA
dd_Smed_v6_885_0_1	NA	GYG2	Glycogenin-2
dd_Smed_v6_8853_0_1	NA	NA	NA
dd_Smed_v6_8866_0_1	NA	NA	NA
dd_Smed_v6_8868_0_1	NA	MON1A	Vacuolar fusion protein MON1 homolog A
dd_Smed_v6_888_0_1	cg8997	NA	NA
dd_Smed_v6_8882_0_1	novel	NA	NA
dd_Smed_v6_8886_0_1	elf3	ELF3	ETS-related transcription factor Elf-3
dd_Smed_v6_8956_0_1	NA	ATP7A	Copper-transporting ATPase 1	-4.25558
dd_Smed_v6_896_0_1	NA	GLUL	Glutamine synthetase	-2.00388
dd_Smed_v6_8962_0_1	NA	MAPK13	Mitogen-activated protein kinase 13
dd_Smed_v6_8979_0_1	novel	NA	NA
dd_Smed_v6_8986_0_1	NA	DSTYK	Dual serine/threonine and tyrosine protein kinase	-3.62386
dd_Smed_v6_8996_0_1	NA	DYNC1H1	Cytoplasmic dynein 1 heavy chain 1	-5.51815
dd_Smed_v6_9016_0_1	NA	ENPP4	Bis(5'-adenosyl)-triphosphatase ENPP4	-3.0597
dd_Smed_v6_9020_0_1	NA	NA	NA
dd_Smed_v6_9028_0_1	NA	KCNK1	Potassium channel subfamily K member 1
dd_Smed_v6_9042_0_1	NA	TMEM116	Transmembrane protein 116
dd_Smed_v6_9051_0_1	NA	SLC16A9	Monocarboxylate transporter 9
dd_Smed_v6_907_0_1	NA	MAT2A	S-adenosylmethionine synthase isoform type-2	-2.77133
dd_Smed_v6_9076_0_1	NA	NA	NA
dd_Smed_v6_9091_0_1	NA	MGRN1	E3 ubiquitin-protein ligase MGRN1
dd_Smed_v6_9107_0_1	upp2	UPP2	Uridine phosphorylase 2
dd_Smed_v6_9112_0_1	NA	NA	NA
dd_Smed_v6_912_0_1	NA	VPS26B	Vacuolar protein sorting-associated protein 26B	-3.43477
dd_Smed_v6_9128_0_1	NA	LRRC4B	Leucine-rich repeat-containing protein 4B	-3.56382
dd_Smed_v6_913_0_1	NA	RAC1	Ras-related C3 botulinum toxin substrate 1
dd_Smed_v6_9133_0_1	NA	SESN1	Sestrin-1
dd_Smed_v6_9144_0_1	NA	TPCN2	Two pore calcium channel protein 2	-4.08795
dd_Smed_v6_9146_0_1	NA	XIAP	E3 ubiquitin-protein ligase XIAP	-3.00719
dd_Smed_v6_9150_0_1	NA	RAB5B	Ras-related protein Rab-5B	-2.95518
dd_Smed_v6_9160_0_1	NA	DNASE2B	Deoxyribonuclease-2-beta
dd_Smed_v6_9173_0_1	NA	MGLL	Monoglyceride lipase	-5.17355
dd_Smed_v6_9198_0_1	NA	ABHD3	Phospholipase ABHD3
dd_Smed_v6_9208_0_1	NA	ABCC2	Canalicular multispecific organic anion transporter 1
dd_Smed_v6_9232_0_1	NA	MGAT2	Alpha-1,6-mannosyl-glycoprotein 2-beta-N-acetylglucosaminyltransferase
dd_Smed_v6_9242_0_1	NA	NA	NA
dd_Smed_v6_9243_0_1	NA	NA	NA
dd_Smed_v6_9254_0_1	NA	CELSR1	Cadherin EGF LAG seven-pass G-type receptor 1	-6.50969
dd_Smed_v6_926_1_1	NA	NA	NA
dd_Smed_v6_927_1_1	NA	FLOT2	Flotillin-2	-2.47394
dd_Smed_v6_9275_0_1	marf	MFN1	Mitofusin-1	-4.22499
dd_Smed_v6_9277_0_1	NA	-	Dct1
dd_Smed_v6_929_0_1	NA	AVIL	Advillin
dd_Smed_v6_9293_0_1	NA	USP3	Ubiquitin carboxyl-terminal hydrolase 3	-3.80678
dd_Smed_v6_9317_0_1	NA	RNF31	E3 ubiquitin-protein ligase RNF31	-3.68182
dd_Smed_v6_9329_0_1	NA	LIMK1	LIM domain kinase 1
dd_Smed_v6_933_0_1	NA	NA	NA
dd_Smed_v6_934_0_1	NA	RER1	RER1 retention in endoplasmic reticulum 1 homolog (S. cerevisiae), isoform CRA_a
dd_Smed_v6_9348_0_1	NA	TBC1D10B	TBC1 domain family member 10B	-3.21488
dd_Smed_v6_9355_0_1	NA	GRAMD1B	GRAM domain-containing protein 1B
dd_Smed_v6_9356_0_1	NA	NA	NA
dd_Smed_v6_9357_0_1	NA	ABCC1	Multidrug resistance-associated protein 1
dd_Smed_v6_9371_0_1	NA	NA	NA
dd_Smed_v6_9401_0_1	NA	SLC23A2	Solute carrier family 23 member 2
dd_Smed_v6_9405_0_1	NA	NAGS	N-acetylglutamate synthase, mitochondrial	-3.40103
dd_Smed_v6_945_0_1	NA	NA	NA
dd_Smed_v6_9472_0_1	NA	NA	NA
dd_Smed_v6_9489_0_1	NA	WTIP	Wilms tumor protein 1-interacting protein
dd_Smed_v6_9490_0_1	NA	DOK3	Docking protein 3	-3.00514
dd_Smed_v6_9496_0_1	NA	NA	NA
dd_Smed_v6_94979_0_1	NA	RPS12	40S ribosomal protein S12	-2.90243
dd_Smed_v6_9499_0_1	NA	SLC17A5	Sialin	-2.69705
dd_Smed_v6_9513_0_1	NA	SLC47A1	Multidrug and toxin extrusion protein 1	down
dd_Smed_v6_9518_0_1	NA	RAB7A	Ras-related protein Rab-7a	-2.50467
dd_Smed_v6_9523_0_1	NA	USP8	Ubiquitin carboxyl-terminal hydrolase 8	-3.24287
dd_Smed_v6_9536_0_1	NA	TEF	Thyrotroph embryonic factor
dd_Smed_v6_9541_0_1	NA	NA	NA
dd_Smed_v6_9556_0_1	NA	DOLK	Dolichol kinase	-6.70763
dd_Smed_v6_9566_0_1	NA	NA	NA
dd_Smed_v6_958_0_1	NA	EML1	Echinoderm microtubule-associated protein-like 1
dd_Smed_v6_959_0_1	NA	ATP6V1A	V-type proton ATPase catalytic subunit A
dd_Smed_v6_960_0_1	NA	TXNRD3	Thioredoxin reductase 3
dd_Smed_v6_962_0_1	NA	YME1L1	ATP-dependent zinc metalloprotease YME1L1	-2.84693
dd_Smed_v6_9650_0_1	NA	IQCG	IQ domain-containing protein G
dd_Smed_v6_9663_0_1	NA	NOTCH3	Neurogenic locus notch homolog protein 3	-5.27022
dd_Smed_v6_9669_0_1	NA	PRKACB	cAMP-dependent protein kinase catalytic subunit beta
dd_Smed_v6_967_0_1	NA	NOP10	H/ACA ribonucleoprotein complex subunit 3
dd_Smed_v6_9672_0_1	NA	NA	NA
dd_Smed_v6_9678_0_1	NA	NA	NA
dd_Smed_v6_9703_0_1	NA	TRAF6	TNF receptor-associated factor 6	-4.9483
dd_Smed_v6_973_0_1	NA	ENPP4	Bis(5'-adenosyl)-triphosphatase ENPP4	-3.0597
dd_Smed_v6_9736_0_1	NA	SLC24A5	Sodium/potassium/calcium exchanger 5
dd_Smed_v6_974_0_1	NA	TRAF4	TNF receptor-associated factor 4	-3.46837
dd_Smed_v6_975_0_1	klk13	KLK13	Kallikrein-13
dd_Smed_v6_9752_0_1	NA	FBXL2	F-box/LRR-repeat protein 2
dd_Smed_v6_9762_0_1	NA	SLC38A7	Putative sodium-coupled neutral amino acid transporter 7
dd_Smed_v6_9771_0_1	NA	NA	NA
dd_Smed_v6_9777_0_1	NA	NA	NA
dd_Smed_v6_978_0_1	NA	ARPC1A	Actin-related protein 2/3 complex subunit 1A	-3.61126
dd_Smed_v6_9781_0_1	NA	NA	NA
dd_Smed_v6_9785_0_1	NA	SDR16C5	Epidermal retinol dehydrogenase 2
dd_Smed_v6_9789_0_1	NA	B3GALT5	Beta-1,3-galactosyltransferase 5
dd_Smed_v6_9792_0_1	NA	NA	NA
dd_Smed_v6_9793_0_1	NA	NA	NA
dd_Smed_v6_9814_0_1	NA	SLC46A3	Solute carrier family 46 member 3	-5.5377
dd_Smed_v6_9825_0_1	NA	NA	NA
dd_Smed_v6_983_0_1	NA	NA	NA
dd_Smed_v6_9836_0_1	NA	AP5M1	AP-5 complex subunit mu-1
dd_Smed_v6_9846_0_1	NA	SLC8B1	Sodium/potassium/calcium exchanger 6, mitochondrial
dd_Smed_v6_985_0_1	NA	NA	NA
dd_Smed_v6_9863_0_1	NA	CYP3A43/CYP3A4	Cytochrome P450	-2.89759
dd_Smed_v6_9866_0_1	NA	GGACT	Gamma-glutamylaminecyclotransferase
dd_Smed_v6_9874_0_1	NA	NA	NA
dd_Smed_v6_9902_0_1	NA	NA	NA
dd_Smed_v6_991_0_1	NA	NA	NA
dd_Smed_v6_9911_0_1	NA	JKAMP	JNK1/MAPK8-associated membrane protein
dd_Smed_v6_9927_0_1	NA	REEP6	Receptor expression-enhancing protein 6	-2.92534
dd_Smed_v6_9929_0_1	NA	NA	NA
dd_Smed_v6_993_0_1	NA	NA	NA
dd_Smed_v6_9932_0_1	hsl	LIPE	Hormone-sensitive lipase
dd_Smed_v6_994_0_1	NA	PANK2	Pantothenate kinase 2, mitochondrial
dd_Smed_v6_9941_0_1	NA	PAK6	Serine/threonine-protein kinase PAK 6	-2.48985
dd_Smed_v6_9963_0_1	NA	NA	NA
Note			Red letters indicate the transcripts-related to mitochondrial function

## Sheet: S1B. Figure Locations
Figure	Panel	geneID	Name in Figure	uniprot Human best hit	All 5 best hit
1	F	dd_Smed_v6_1412_0_1	cpa2	CPA2	CPA2
1	F	dd_Smed_v6_279_0_1	rpz4	NA	rpz4
1	F	dd_Smed_v6_4693_0_1	lipf	LIPF	LIPF
1	F	dd_Smed_v6_1067_0_1	atp6ap2	ATP6AP2	atp6ap2
1	F	dd_Smed_v6_2351_0_1	cyp2b19	CYP2B6	Cyp2b19
1	F	dd_Smed_v6_4449_0_1	cyp2a6	CYP2A6	CYP2A6
1	F	dd_Smed_v6_241_0_1	psap	PSAP	PSAP
1	F	dd_Smed_v6_31_0_1	ct14378	CPA6	CT14378
1	F	dd_Smed_v6_41_0_1	spint3	TFPI	Spint3
1	F	dd_Smed_v6_1401_0_1	novel	NA	NA
2	B	dd_Smed_v6_1251_0_1	fhl3	FHL3	FHL3
2	B	dd_Smed_v6_1694_0_1	hnf-4	HNF4G	hnf4a
2	B	dd_Smed_v6_271_0_1	fabp7	FABP7	FABP7
2	B	dd_Smed_v6_267_0_1	ctsla	CTSV	ctsla
2	B	dd_Smed_v6_194_0_1	apob-2	MUC2	Apoltp
2	B	dd_Smed_v6_413_0_1	oys	MBOAT2	oys
2	B	dd_Smed_v6_3616_0_1	trpml	MCOLN2	Trpml
2	B	dd_Smed_v6_2361_0_1	slc47a1	SLC47A1	slc47a1
2	B	dd_Smed_v6_48_0_1	ctsl.1	CTSL	ctsl.1
2	B	dd_Smed_v6_2716_0_1	nkx2.2	NKX2-2	nkx2.2a
2	D	dd_Smed_v6_2021_0_1	pi16	PI16	PI16
2	D	dd_Smed_v6_131_0_1	novel	NA	NA
2	D	dd_Smed_v6_8642_0_1	rgl1	RGL1	RGL1
2	D	dd_Smed_v6_3045_0_1	fam21c	WASHC2A	fam21c
2	D	dd_Smed_v6_6647_0_1	stck	LIMS1	stck
2	D	dd_Smed_v6_859_0_1	cat	CAT	CAT
2	D	dd_Smed_v6_10_1_1	zgc:172053	COLEC10	zgc:172053
2	D	dd_Smed_v6_603_0_1	calm3	CALM1	Calm3
2	D	dd_Smed_v6_7541_0_1	cg4386	TMPRSS15	CG4386
2	D	dd_Smed_v6_300_0_1	spint3	COL6A3	Spint3
2	F	dd_Smed_v6_66_0_1	gzmm	KLK13	Gzmm
2	F	dd_Smed_v6_254_0_1	cg7631	BMP1	CG7631
2	F	dd_Smed_v6_827_0_1	rpz4	NA	rpz4
2	F	dd_Smed_v6_72_0_1	novel	NA	NA
2	F	dd_Smed_v6_73_0_1	npc2	NPC2	Npc2
2	F	dd_Smed_v6_1159_0_1	slc22a6	SLC22A6	Orct
2	F	dd_Smed_v6_3455_0_1	cele_y59a8b	NA	CELE_Y59A8B.21
2	F	dd_Smed_v6_888_0_1	cg8997	NA	CG8997
2	F	dd_Smed_v6_3101_0_1	ank1	ANK1	Ank1
2	F	dd_Smed_v6_101_0_1	eppin	EPPIN	EPPIN
3	A	dd_Smed_v6_73_0_1	npc2	NPC2	Npc2
3	A	dd_Smed_v6_267_0_1	ctsla	CTSV	ctsla
3	B	dd_Smed_v6_1159_0_1	slc22a6	SLC22A6	Orct
3	B	dd_Smed_v6_267_0_1	ctsla	CTSV	ctsla
3	C	dd_Smed_v6_73_0_1	npc2	NPC2	Npc2
3	C	dd_Smed_v6_1159_0_1	slc22a6	SLC22A6	Orct
3	D	dd_Smed_v6_323_0_1	tni-4	TNNI3	tni-4
3	D	dd_Smed_v6_1159_0_1	slc22a6	SLC22A6	Orct
3	E	dd_Smed_v6_1159_0_1	slc22a6	SLC22A6	Orct
4	A	dd_Smed_v6_254_0_1	cg7631	BMP1	CG7631
4	A	dd_Smed_v6_2021_0_1	pi16	PI16	PI16
4	B	dd_Smed_v6_300_0_1	spint3	COL6A3	Spint3
4	B	dd_Smed_v6_73_0_1	npc2	NPC2	Npc2
4	C	dd_Smed_v6_254_0_1	cg7631	BMP1	CG7631
4	C	dd_Smed_v6_300_0_1	spint3	COL6A3	Spint3
4	D	dd_Smed_v6_10_1_1	zgc:172053	COLEC10	zgc:172053
4	D	dd_Smed_v6_1159_0_1	slc22a6	SLC22A6	Orct
4	E	dd_Smed_v6_1159_0_1	slc22a6	SLC22A6	Orct
4	E	dd_Smed_v6_271_0_1	fabp7	FABP7	FABP7
4	F	dd_Smed_v6_267_0_1	ctsla	CTSV	ctsla
4	F	dd_Smed_v6_271_0_1	fabp7	FABP7	FABP7
4	G	dd_Smed_v6_73_0_1	npc2	NPC2	Npc2
4	G	dd_Smed_v6_271_0_1	fabp7	FABP7	FABP7
5	D	dd_Smed_v6_2670_0_1	med21	MED21	MED21
5	D	dd_Smed_v6_2784_0_1	rhoab	RHOA	rhoab
5	D	dd_Smed_v6_3842_2_1	cg6153	PITHD1	CG6153
5	D	dd_Smed_v6_4591_0_1	ggt1	GGT1	GGT1
5	D	dd_Smed_v6_4992_0_1	zfand4	ZFAND5	Zfand4
5	D	dd_Smed_v6_6663_0_1	slc5a9	SLC5A1	slc5a9
5	D	dd_Smed_v6_8176_0_1	helz2	HELZ2	HELZ2
5	D	dd_Smed_v6_8505_0_1	pgrp-le	PGLYRP1	PGRP-LE
5	D	dd_Smed_v6_8642_0_1	rgl1	RGL1	RGL1
5	D	dd_Smed_v6_9932_0_1	hsl	LIPE	Hsl
5	D	dd_Smed_v6_11807_0_1	sert	SLC6A19	SerT
5	D	dd_Smed_v6_12990_0_1	slc8a1	SLC8A1	Slc8a1
5	E	dd_Smed_v6_1401_0_1	novel	NA	NA
5	E	dd_Smed_v6_1412_0_1	cpa2	CPA2	CPA2
5	E	dd_Smed_v6_3728_0_1	klk13	KLK13	KLK13
5	E	dd_Smed_v6_8406_0_1	pcsk1	PCSK1	Pcsk1
5	F	dd_Smed_v6_7470_0_1	gli-1	GLI3	ci
5	G	dd_Smed_v6_9107_0_1	upp2	UPP2	Upp2
5	H	dd_Smed_v6_8979_0_1	novel	NA	NA
5	H	dd_Smed_v6_10241_0_1	cib2	CIB2	CIB2
8	A	dd_Smed_v6_73_0_1	npc2	NPC2	Npc2
8	A	dd_Smed_v6_267_0_1	ctsla	CTSV	ctsla
8	B	dd_Smed_v6_73_0_1	npc2	NPC2	Npc2
8	B	dd_Smed_v6_1159_0_1	slc22a6	SLC22A6	Orct
8	C	dd_Smed_v6_73_0_1	npc2	NPC2	Npc2
8	C	dd_Smed_v6_267_0_1	ctsla	CTSV	ctsla
Fig1-figsupp2	NA	dd_Smed_v6_66_0_1	gzmm	KLK13	Gzmm
Fig1-figsupp2	NA	dd_Smed_v6_254_0_1	cg7631	BMP1	CG7631
Fig1-figsupp2	NA	dd_Smed_v6_1412_0_1	cpa2	CPA2	CPA2
Fig1-figsupp2	NA	dd_Smed_v6_827_0_1	rpz4	NA	rpz4
Fig1-figsupp2	NA	dd_Smed_v6_279_0_1	rpz4	NA	rpz4
Fig1-figsupp2	NA	dd_Smed_v6_3728_0_1	klk13	KLK13	KLK13
Fig1-figsupp2	NA	dd_Smed_v6_72_0_1	novel	NA	NA
Fig1-figsupp2	NA	dd_Smed_v6_634_0_1	rpz4	NA	rpz4
Fig1-figsupp2	NA	dd_Smed_v6_214_1_1	gm2a	GM2A	GM2A
Fig1-figsupp2	NA	dd_Smed_v6_975_0_1	klk13	KLK13	KLK13
Fig1-figsupp2	NA	dd_Smed_v6_257_0_1	lipf	LIPF	lipf
Fig1-figsupp2	NA	dd_Smed_v6_1251_0_1	fhl3	FHL3	FHL3
Fig1-figsupp2	NA	dd_Smed_v6_2021_0_1	pi16	PI16	PI16
Fig1-figsupp2	NA	dd_Smed_v6_1523_0_1	pgrp-lb	PGLYRP3	PGRP-LB
Fig1-figsupp2	NA	dd_Smed_v6_73_0_1	npc2	NPC2	Npc2
Fig1-figsupp2	NA	dd_Smed_v6_131_0_1	novel	NA	NA
Fig1-figsupp2	NA	dd_Smed_v6_4693_0_1	lipf	LIPF	LIPF
Fig1-figsupp2	NA	dd_Smed_v6_4792_0_1	ft	NOTCH4	ft
Fig1-figsupp2	NA	dd_Smed_v6_1726_0_1	cdase	ASAH2	CDase
Fig1-figsupp2	NA	dd_Smed_v6_8406_0_1	pcsk1	PCSK1	Pcsk1
Fig1-figsupp2	NA	dd_Smed_v6_6663_0_1	slc5a9	SLC5A1	slc5a9
Fig1-figsupp2	NA	dd_Smed_v6_12990_0_1	slc8a1	SLC8A1	Slc8a1
Fig1-figsupp2	NA	dd_Smed_v6_1062_0_1	gaa	GAA	Gaa
Fig1-figsupp2	NA	dd_Smed_v6_8882_0_1	novel	NA	NA
Fig1-figsupp2	NA	dd_Smed_v6_8642_0_1	rgl1	RGL1	RGL1
Fig1-figsupp2	NA	dd_Smed_v6_1694_0_1	hnf-4	HNF4G	hnf4a
Fig1-figsupp2	NA	dd_Smed_v6_4591_0_1	ggt1	GGT1	GGT1
Fig1-figsupp2	NA	dd_Smed_v6_2784_0_1	rhoab	RHOA	rhoab
Fig1-figsupp2	NA	dd_Smed_v6_19_0_1	novel	NA	NA
Fig1-figsupp2	NA	dd_Smed_v6_636_0_1	apob-1	APOB	Apoltp
Fig1-figsupp2	NA	dd_Smed_v6_1067_0_1	atp6ap2	ATP6AP2	atp6ap2
Fig1-figsupp2	NA	dd_Smed_v6_9275_0_1	marf	MFN1	Marf
Fig1-figsupp2	NA	dd_Smed_v6_9107_0_1	upp2	UPP2	Upp2
Fig1-figsupp2	NA	dd_Smed_v6_4992_0_1	zfand4	ZFAND5	Zfand4
Fig1-figsupp2	NA	dd_Smed_v6_3632_0_1	tnx	TNXB	Tnx
Fig1-figsupp2	NA	dd_Smed_v6_1455_0_1	zn72d	ZNF346	Zn72D
Fig1-figsupp2	NA	dd_Smed_v6_3324_0_1	inhbab	NA	inhbab
Fig1-figsupp2	NA	dd_Smed_v6_2886_0_1	zgc:153993	BAK1	zgc:153993
Fig1-figsupp2	NA	dd_Smed_v6_11807_0_1	sert	SLC6A19	SerT
Fig1-figsupp2	NA	dd_Smed_v6_3824_0_1	serpinb3a	SERPINB13	Serpinb3a
Fig1-figsupp2	NA	dd_Smed_v6_2906_0_1	rab10	RAB10	Rab10
Fig1-figsupp2	NA	dd_Smed_v6_4120_0_1	loc100329520	INHBE	LOC100329520
Fig1-figsupp2	NA	dd_Smed_v6_8176_0_1	helz2	HELZ2	HELZ2
Fig1-figsupp2	NA	dd_Smed_v6_2690_0_1	plb1	PLB1	Plb1
Fig1-figsupp2	NA	dd_Smed_v6_3045_0_1	fam21c	WASHC2A	fam21c
Fig1-figsupp2	NA	dd_Smed_v6_564_0_1	ponzr2	CNFN	ponzr2
Fig1-figsupp2	NA	dd_Smed_v6_6619_0_1	tmc4	TMC5	Tmc4
Fig1-figsupp2	NA	dd_Smed_v6_154_0_1	plin5	PLIN5	Plin5
Fig1-figsupp2	NA	dd_Smed_v6_3638_0_1	cbt	KLF13	cbt
Fig1-figsupp2	NA	dd_Smed_v6_690_0_1	argbpip	argBPIB	argBPIB
Fig1-figsupp2	NA	dd_Smed_v6_7938_0_1	mitf	MITF	Mitf
Fig1-figsupp2	NA	dd_Smed_v6_81_0_1	ctsb	CTSB	Ctsb
Fig1-figsupp2	NA	dd_Smed_v6_3903_0_1	ada	ADA	ada
Fig1-figsupp2	NA	dd_Smed_v6_1655_0_1	uroc1	UROC1	uroc1
Fig1-figsupp2	NA	dd_Smed_v6_1_0_1	novel	NA	NA
Fig1-figsupp2	NA	dd_Smed_v6_8252_0_1	lhx1	LHX1	LHX1
Fig1-figsupp2	NA	dd_Smed_v6_545_0_1	vha-10	ATP6V1G2	vha-10
Fig1-figsupp2	NA	dd_Smed_v6_2219_0_1	hal	HAL	hal
Fig1-figsupp2	NA	dd_Smed_v6_9932_0_1	hsl	LIPE	Hsl
Fig1-figsupp2	NA	dd_Smed_v6_423_0_1	csta	CSTA	Csta
Fig1-figsupp2	NA	dd_Smed_v6_260_0_1	tsr	CFL1	tsr
Fig1-figsupp2	NA	dd_Smed_v6_229_0_1	novel	NA	NA
Fig1-figsupp2	NA	dd_Smed_v6_4198_0_1	sgk3	SGK3	sgk3
Fig1-figsupp2	NA	dd_Smed_v6_271_0_1	fabp7	FABP7	FABP7
Fig1-figsupp2	NA	dd_Smed_v6_3795_0_1	novel	NA	NA
Fig1-figsupp2	NA	dd_Smed_v6_2670_0_1	med21	MED21	MED21
Fig1-figsupp2	NA	dd_Smed_v6_75_0_1	cg3884	NA	CG3884
Fig1-figsupp2	NA	dd_Smed_v6_2031_0_1	svep1	NOTCH3	Svep1
Fig1-figsupp2	NA	dd_Smed_v6_4947_0_1	mogat2	MOGAT2	MOGAT2
Fig1-figsupp2	NA	dd_Smed_v6_440_0_1	cd63	CD63	cd63
Fig1-figsupp2	NA	dd_Smed_v6_44_0_1	cg44251	NA	CG44251
Fig1-figsupp2	NA	dd_Smed_v6_267_0_1	ctsla	CTSV	ctsla
Fig1-figsupp2	NA	dd_Smed_v6_6647_0_1	stck	LIMS1	stck
Fig1-figsupp2	NA	dd_Smed_v6_194_0_1	apob-2	MUC2	Apoltp
Fig1-figsupp2	NA	dd_Smed_v6_413_0_1	oys	MBOAT2	oys
Fig1-figsupp2	NA	dd_Smed_v6_3602_0_1	apmap	APMAP	apmap
Fig1-figsupp2	NA	dd_Smed_v6_3842_2_1	cg6153	PITHD1	CG6153
Fig1-figsupp2	NA	dd_Smed_v6_10374_0_1	sbno2a	SBNO1	sbno2a
Fig1-figsupp2	NA	dd_Smed_v6_1544_0_1	scamp1	SCAMP1	SCAMP1
Fig1-figsupp2	NA	dd_Smed_v6_5344_0_1	cyp2f2	CYP2F1	Cyp2f2
Fig1-figsupp2	NA	dd_Smed_v6_6727_0_1	mgll	MGLL	Mgll
Fig1-figsupp2	NA	dd_Smed_v6_6869_0_1	ptf1a	PTF1A	Fer1
Fig1-figsupp2	NA	dd_Smed_v6_1643_0_1	crn-7	DNASE2	crn-7
Fig1-figsupp2	NA	dd_Smed_v6_20_0_1	hpgds	HPGDS	HPGDS
Fig1-figsupp2	NA	dd_Smed_v6_5177_0_1	zfp64	ZFP64	ZFP64
Fig1-figsupp2	NA	dd_Smed_v6_2351_0_1	cyp2b19	CYP2B6	Cyp2b19
Fig1-figsupp2	NA	dd_Smed_v6_219_0_1	ctsc	CTSC	CTSC
Fig1-figsupp2	NA	dd_Smed_v6_1585_0_1	cbs	CBS	CBS
Fig1-figsupp2	NA	dd_Smed_v6_2914_0_1	rock1	ROCK1	rock1
Fig1-figsupp2	NA	dd_Smed_v6_1333_0_1	cg10527	NA	CG10527
Fig1-figsupp2	NA	dd_Smed_v6_3106_0_1	cyp3a13	CYP3A4	Cyp3a13
Fig1-figsupp2	NA	dd_Smed_v6_3616_0_1	trpml	MCOLN2	Trpml
Fig1-figsupp2	NA	dd_Smed_v6_2361_0_1	slc47a1	SLC47A1	slc47a1
Fig1-figsupp2	NA	dd_Smed_v6_48_0_1	ctsl.1	CTSL	ctsl.1
Fig1-figsupp2	NA	dd_Smed_v6_442_0_1	grn	GRN	GRN
Fig1-figsupp2	NA	dd_Smed_v6_7766_0_1	sult1c4	SULT1C4	sult1st5
Fig1-figsupp2	NA	dd_Smed_v6_2813_0_1	chdh	CHDH	Chdh
Fig1-figsupp2	NA	dd_Smed_v6_5787_0_1	aldh1l2	ALDH1L2	ALDH1L2
Fig1-figsupp2	NA	dd_Smed_v6_215_0_1	psap	PSAP	psap
Fig1-figsupp2	NA	dd_Smed_v6_5699_0_1	rush	PLEKHF2	rush
Fig1-figsupp2	NA	dd_Smed_v6_7470_0_1	gli-1	GLI3	ci
Fig1-figsupp2	NA	dd_Smed_v6_2871_0_1	cyp2u1	CYP2U1	cyp2u1
Fig1-figsupp2	NA	dd_Smed_v6_784_0_1	cuc-1	ATOX1	cuc-1
Fig1-figsupp2	NA	dd_Smed_v6_2716_0_1	nkx2.2	NKX2-2	nkx2.2a
Fig1-figsupp2	NA	dd_Smed_v6_3254_1_1	novel	NA	NA
Fig1-figsupp2	NA	dd_Smed_v6_1325_0_1	zmym1	ZMYM1	ZMYM1
Fig1-figsupp2	NA	dd_Smed_v6_859_0_1	cat	CAT	CAT
Fig1-figsupp2	NA	dd_Smed_v6_1621_0_1	aldh8a1	ALDH8A1	ALDH8A1
Fig1-figsupp2	NA	dd_Smed_v6_4449_0_1	cyp2a6	CYP2A6	CYP2A6
Fig1-figsupp2	NA	dd_Smed_v6_8190_0_1	lhx2b	LHX9	lhx2b
Fig1-figsupp2	NA	dd_Smed_v6_2368_0_1	novel	NA	NA
Fig1-figsupp2	NA	dd_Smed_v6_241_0_1	psap	PSAP	PSAP
Fig1-figsupp2	NA	dd_Smed_v6_58_0_1	colec11	COLEC11	colec11
Fig1-figsupp2	NA	dd_Smed_v6_1406_0_1	novel	NA	NA
Fig1-figsupp2	NA	dd_Smed_v6_1159_0_1	slc22a6	SLC22A6	Orct
Fig1-figsupp2	NA	dd_Smed_v6_14_0_1	novel	NA	NA
Fig1-figsupp2	NA	dd_Smed_v6_10_1_1	zgc:172053	COLEC10	zgc:172053
Fig1-figsupp2	NA	dd_Smed_v6_3455_0_1	cele_y59a8b	NA	CELE_Y59A8B.21
Fig1-figsupp2	NA	dd_Smed_v6_3443_0_1	znf408	ZFP37	znf408
Fig1-figsupp2	NA	dd_Smed_v6_122_1_1	lipa	LIPA	LIPA
Fig1-figsupp2	NA	dd_Smed_v6_115_0_1	novel	NA	NA
Fig1-figsupp2	NA	dd_Smed_v6_3550_0_1	tdo2	TDO2	v
Fig1-figsupp2	NA	dd_Smed_v6_5978_0_1	nfat5	NFAT5	Nfat5
Fig1-figsupp2	NA	dd_Smed_v6_1347_0_1	novel	NA	NA
Fig1-figsupp2	NA	dd_Smed_v6_100_0_1	novel	NA	NA
Fig1-figsupp2	NA	dd_Smed_v6_1553_0_1	novel	NA	NA
Fig1-figsupp2	NA	dd_Smed_v6_4075_0_1	gata456	GATA4	GATA4
Fig1-figsupp2	NA	dd_Smed_v6_79_0_1	si:dkey-241	SFTPA1	si:dkey-241l7.4
Fig1-figsupp2	NA	dd_Smed_v6_888_0_1	cg8997	NA	CG8997
Fig1-figsupp2	NA	dd_Smed_v6_11330_0_1	slc10a2	SLC10A2	Slc10a2
Fig1-figsupp2	NA	dd_Smed_v6_10103_0_1	RREB2	RREB1	rreb1a
Fig1-figsupp2	NA	dd_Smed_v6_12219_0_1	helz2	HELZ2	Helz2
Fig1-figsupp2	NA	dd_Smed_v6_603_0_1	calm3	CALM1	Calm3
Fig1-figsupp2	NA	dd_Smed_v6_3101_0_1	ank1	ANK1	Ank1
Fig1-figsupp2	NA	dd_Smed_v6_31_0_1	ct14378	CPA6	CT14378
Fig1-figsupp2	NA	dd_Smed_v6_8505_0_1	pgrp-le	PGLYRP1	PGRP-LE
Fig1-figsupp2	NA	dd_Smed_v6_7541_0_1	cg4386	TMPRSS15	CG4386
Fig1-figsupp2	NA	dd_Smed_v6_2506_0_1	novel	NA	NA
Fig1-figsupp2	NA	dd_Smed_v6_71_0_1	wfikkn2	APLP2	Wfikkn2
Fig1-figsupp2	NA	dd_Smed_v6_41_0_1	spint3	TFPI	Spint3
Fig1-figsupp2	NA	dd_Smed_v6_101_0_1	eppin	EPPIN	EPPIN
Fig1-figsupp2	NA	dd_Smed_v6_300_0_1	spint3	COL6A3	Spint3
Fig1-figsupp2	NA	dd_Smed_v6_1401_0_1	novel	NA	NA
Fig1-figsupp2	NA	dd_Smed_v6_25_0_1	nid2	NID2	NID2
Fig3-figsupp1	A	dd_Smed_v6_48_0_1	ctsl.1	CTSL	ctsl.1
Fig3-figsupp1	A	dd_Smed_v6_267_0_1	ctsla	CTSV	ctsla
Fig3-figsupp1	A	dd_Smed_v6_73_0_1	npc2	NPC2	Npc2
Fig3-figsupp1	A	dd_Smed_v6_1159_0_1	slc22a6	SLC22A6	Orct
Fig3-figsupp1	A	dd_Smed_v6_194_0_1	apob-2	MUC2	Apoltp
Fig3-figsupp1	B	dd_Smed_v6_79_0_1	si:dkey-241	SFTPA1	si:dkey-241l7.4
Fig3-figsupp1	B	dd_Smed_v6_194_0_1	apob-2	MUC2	Apoltp
Fig3-figsupp1	B	dd_Smed_v6_73_0_1	npc2	NPC2	Npc2
Fig3-figsupp1	B	dd_Smed_v6_1159_0_1	slc22a6	SLC22A6	Orct
Fig3-figsupp1	C	dd_Smed_v6_1062_0_1	gaa	GAA	Gaa
Fig3-figsupp1	C	dd_Smed_v6_194_0_1	apob-2	MUC2	Apoltp
Fig3-figsupp1	C	dd_Smed_v6_73_0_1	npc2	NPC2	Npc2
Fig3-figsupp1	C	dd_Smed_v6_1159_0_1	slc22a6	SLC22A6	Orct
Fig3-figsupp1	D	dd_Smed_v6_413_0_1	oys	MBOAT2	oys
Fig3-figsupp1	D	dd_Smed_v6_194_0_1	apob-2	MUC2	Apoltp
Fig3-figsupp1	D	dd_Smed_v6_73_0_1	npc2	NPC2	Npc2
Fig3-figsupp1	D	dd_Smed_v6_1159_0_1	slc22a6	SLC22A6	Orct
Fig6-figsupp3	A	dd_Smed_v6_1412_0_1	cpa2	CPA2	CPA2
Fig6-figsupp3	A	dd_Smed_v6_4693_0_1	lipf	LIPF	LIPF
Fig6-figsupp3	A	dd_Smed_v6_975_0_1	klk13	KLK13	KLK13
Fig6-figsupp3	A	dd_Smed_v6_1523_0_1	pgrp-lb	PGLYRP3	PGRP-LB
Fig6-figsupp3	B	dd_Smed_v6_25_0_1	nid2	NID2	NID2
Fig6-figsupp3	B	dd_Smed_v6_300_0_1	spint3	COL6A3	Spint3
Fig6-figsupp3	C	dd_Smed_v6_8406_0_1	pcsk1	PCSK1	Pcsk1
Fig6-figsupp3	C	dd_Smed_v6_73_0_1	npc2	NPC2	Npc2
Fig6-figsupp3	D	dd_Smed_v6_17988_0_1	muc-like 1	SSPO	vwf
Fig6-figsupp3	D	dd_Smed_v6_18786_0_1	muc-like 2	MUC5B	Muc5b
Fig6-figsupp3	D	dd_Smed_v6_21309_0_1	muc-like 3	MUC2	vwf
Fig8-figsupp1	NA	dd_Smed_v6_1694_0_1	hnf-4	HNF4G	hnf4a
Fig8-figsupp1	NA	dd_Smed_v6_2670_0_1	med21	MED21	MED21
Fig8-figsupp1	NA	dd_Smed_v6_2716_0_1	nkx2.2	NKX2-2	nkx2.2a
Fig8-figsupp1	NA	dd_Smed_v6_3443_0_1	znf408	ZFP37	znf408
Fig8-figsupp1	NA	dd_Smed_v6_3638_0_1	cbt	KLF13	cbt
Fig8-figsupp1	NA	dd_Smed_v6_4075_0_1	gata456	GATA4	GATA4
Fig8-figsupp1	NA	dd_Smed_v6_4685_0_1	creb1	CREB1	CREB1
Fig8-figsupp1	NA	dd_Smed_v6_5177_0_1	zfp64	ZFP64	ZFP64
Fig8-figsupp1	NA	dd_Smed_v6_5978_0_1	nfat5	NFAT5	Nfat5
Fig8-figsupp1	NA	dd_Smed_v6_6869_0_1	ptf1a	PTF1A	Fer1
Fig8-figsupp1	NA	dd_Smed_v6_7470_0_1	gli-1	GLI3	ci
Fig8-figsupp1	NA	dd_Smed_v6_7863_0_1	meis1a	MEIS2	meis1a
Fig8-figsupp1	NA	dd_Smed_v6_7938_0_1	mitf	MITF	Mitf
Fig8-figsupp1	NA	dd_Smed_v6_8176_0_1	helz2	HELZ2	HELZ2
Fig8-figsupp1	NA	dd_Smed_v6_8190_0_1	lhx2b	LHX9	lhx2b
Fig8-figsupp1	NA	dd_Smed_v6_8252_0_1	lhx1	LHX1	LHX1
Fig8-figsupp1	NA	dd_Smed_v6_8886_0_1	elf3	ELF3	elf3
Fig8-figsupp1	NA	dd_Smed_v6_10103_0_1	RREB2	RREB1	rreb1a
Fig8-figsupp1	NA	dd_Smed_v6_11118_0_1	znf281	ZNF281	ZNF281
Fig8-figsupp1	NA	dd_Smed_v6_12010_0_1	lin-48	OVOL1	lin-48
Fig8-figsupp1	NA	dd_Smed_v6_12219_0_1	helz2	HELZ2	Helz2
Fig8-figsupp1	NA	dd_Smed_v6_15178_0_1	six7	SIX6	six7
Fig8-figsupp2	A	dd_Smed_v6_2021_0_1	pi16	PI16	PI16
Fig8-figsupp2	A	dd_Smed_v6_267_0_1	ctsla	CTSV	ctsla
Fig8-figsupp2	B	dd_Smed_v6_73_0_1	npc2	NPC2	Npc2
Fig8-figsupp2	B	dd_Smed_v6_267_0_1	ctsla	CTSV	ctsla
Fig8-figsupp2	C	dd_Smed_v6_73_0_1	npc2	NPC2	Npc2
Fig8-figsupp2	C	dd_Smed_v6_267_0_1	ctsla	CTSV	ctsla
Fig8-figsupp3	A	dd_Smed_v6_254_0_1	cg7631	BMP1	CG7631
Fig8-figsupp3	A	dd_Smed_v6_300_0_1	spint3	COL6A3	Spint3
Fig8-figsupp3	B	dd_Smed_v6_254_0_1	cg7631	BMP1	CG7631
Fig8-figsupp3	B	dd_Smed_v6_300_0_1	spint3	COL6A3	Spint3
Fig8-figsupp4	A	dd_Smed_v6_7470_0_1	gli-1	GLI3	ci
Fig8-figsupp4	A	dd_Smed_v6_267_0_1	ctsla	CTSV	ctsla
Fig8-figsupp4	A	dd_Smed_v6_1159_0_1	slc22a6	SLC22A6	Orct
Fig8-figsupp4	A	dd_Smed_v6_73_0_1	npc2	NPC2	Npc2
Fig8-figsupp4	A	dd_Smed_v6_323_0_1	tni-4	TNNI3	tni-4
Fig8-figsupp4	B	dd_Smed_v6_10103_0_1	RREB2	RREB1	rreb1a
Fig8-figsupp4	B	dd_Smed_v6_267_0_1	ctsla	CTSV	ctsla
Fig8-figsupp4	B	dd_Smed_v6_1159_0_1	slc22a6	SLC22A6	Orct
Fig8-figsupp4	B	dd_Smed_v6_73_0_1	npc2	NPC2	Npc2
Fig8-figsupp4	B	dd_Smed_v6_323_0_1	tni-4	TNNI3	tni-4
Fig8-figsupp5	A	dd_Smed_v6_73_0_1	npc2	NPC2	Npc2
Fig8-figsupp5	B	dd_Smed_v6_73_0_1	npc2	NPC2	Npc2
Fig8-figsupp5	C	dd_Smed_v6_73_0_1	npc2	NPC2	Npc2

## Sheet: LEGEND
Supplementary File 1. RNA-Seq and Other Data for 1,844 Intestine-Enriched Transcripts.
Table		Legend
S1A. 1844 Intestine-enriched		All Laser Capture expression data, Phagocyte data, Primers and ESTs, Single Cell comparisions, top BLASTX hits, and sequences for 1844 intestine-enriched transcripts (logFC>1, FDR-adjusted p-value<.01 in either medial or lateral intestine, and TPM>2 in 4/8 medial or lateral intestine samples).
S1B. Figure Locations		Figure locations for WISH and FISH expression patterns
Columns (S1A)		A	dd_Smed_v6 gene ID
		B	Gene name used in this study. Names are based on the "all 5 best hit" unless gene was previously named (see Methods)
		C-D	top BLASTX hits vs. uniprot human, and the uniprot description
		E	transcript length (bp)
		F-H	log fold-change, log CPM, and FDR-adjusted p values for medial intestine replicates vs. non-gut biological replicates.
		I-K	log fold-change, log CPM, and FDR-adjusted p values for lateral intestine replicates vs. non-gut biological replicates.
		L-O	Fold changes, ratio of medial to lateral fold changes, and color assignment based on mediolateral FC ratio.
		P-S	EST_ID and phagocyte microarray expression data from Forsthoefel et al., Dev. Cell, 2012: log2 fold-change, average expression, and FDR-adjusted p values.
		T	Pattern observed in WISH experiment.
		U	Fincher et al., Science, 2018 (Table S2) global cluster IDs for all LCM intestine-enriched transcripts
		V	Fincher et al., Science, 2018 (Table S2) cell types for all LCM intestine-enriched transcripts
		W	Fincher et al., Science, 2018 (Table S2) intestine subcluster IDs for all LCM intestine-enriched transcripts
		X	All cell type assignments from Plass et al., Science, 2018 (Table S3). Reprinted with permission from AAAS.
		Y	All cell type assignments in Swapna et al., Genome Biol., 2018 (Seurat clusters in Additional File on "figshare")
		Z-BI	top BLASTX hits vs. uniprot human, mouse, zebrafish, fruit fly, roundworm, and all 5 organism databases.
		BJ-BL	EST IDs or Forward and Reverse primers for genes used in this study
		BM	Cloning vector for genes used in this study
		BN	PlanMine dd_Smed_v6 sequence for all 1844 intestine-enriched transcripts
Columns (S1B)		A	Figure number
		B	Figure panel
		C	dd_Smed_v6 gene ID
		D	Transcript name used in Figure
		E	uniprot Human best hit
		F	top BLASTX hit from 5 organism database (human, mouse, zebrafish, fruit fly, roundworm)
