# Supplementary material for: Djhsp60 Is Required for Planarian Regeneration and Homeostasis
Source: Biomolecules. 2022 Jun 9;12(6):808. doi: 10.3390/biom12060808 (PMC9221281; doi:10.3390/biom12060808)
Supplement: Supplementary file 1 [file biomolecules-12-00808-s001.zip › Supplementary File 7 Up-regulated transcripts.xlsx]

## Sheet: Sheet1
Gene_id	NR annotation	log2FoldChange	Regulation
TRINITY_DN5180_c0_g1_i1	uncharacterized protein K02A2.6-like		Up
TRINITY_DN31967_c0_g1_i1			Up
TRINITY_DN31346_c0_g1_i1			Up
TRINITY_DN30156_c0_g1_i1	polyprotein		Up
TRINITY_DN18534_c0_g2_i1			Up
TRINITY_DN1466_c0_g1_i1			Up
TRINITY_DN28575_c0_g1_i1		5.61852	Up
TRINITY_DN33743_c0_g1_i1		5.42326	Up
TRINITY_DN26251_c2_g7_i1		4.91465	Up
TRINITY_DN22849_c0_g4_i1	Dj_aH_000_0450HH, expressed in head	3.95644	Up
TRINITY_DN24872_c0_g3_i1	Macrophage-expressed gene 1 protein	3.9441	Up
TRINITY_DN11992_c0_g1_i1		3.60163	Up
TRINITY_DN9952_c0_g1_i1	X1.A5.1, partial [Schmidtea mediterranea]	3.57596	Up
TRINITY_DN22849_c0_g1_i1		3.36102	Up
TRINITY_DN17613_c0_g2_i1		2.76291	Up
TRINITY_DN18713_c0_g1_i1	cathepsin L1 [Dugesia japonica]	2.53404	Up
TRINITY_DN1241_c0_g1_i1	cathepsin L2 [Dugesia japonica]	2.51865	Up
TRINITY_DN26137_c0_g2_i1	glutamine--tRNA ligase	2.3348	Up
TRINITY_DN19791_c0_g2_i1		2.25843	Up
TRINITY_DN5098_c0_g1_i1	hypothetical protein BV898_11493 [Hypsibius dujardini]	2.08282	Up
TRINITY_DN15921_c0_g2_i1	Eukaryotic translation initiation factor 2 subunit 2	2.07699	Up
TRINITY_DN27596_c0_g1_i13	mucin-2 like	1.99964	Up
TRINITY_DN32295_c0_g1_i1	Potential E3 ubiquitin-protein ligase ariadne-1	1.99791	Up
TRINITY_DN23709_c0_g1_i1	Dynamin-1-like protein	1.97647	Up
TRINITY_DN25672_c0_g1_i1	slc7a-7 [Schmidtea mediterranea]	1.86872	Up
TRINITY_DN24232_c0_g1_i1	eukaryotic translation initiation factor 2 subunit 3	1.85367	Up
TRINITY_DN17845_c0_g1_i2	Phenylalanine--tRNA ligase beta subunit	1.78575	Up
TRINITY_DN19791_c0_g1_i1		1.72946	Up
TRINITY_DN26577_c0_g1_i2	cathepsin L2 [Dugesia japonica]	1.58668	Up
TRINITY_DN27996_c0_g1_i6	isoleucyl-tRNA synthetase	1.56112	Up
TRINITY_DN23172_c0_g2_i3	Threonine--tRNA ligase	1.55895	Up
TRINITY_DN26791_c0_g1_i5	SCO-spondin	1.3943	Up
TRINITY_DN5143_c0_g1_i1	multiple epidermal growth factor-like domains protein 6	1.3611	Up
TRINITY_DN21325_c0_g3_i1	hypothetical protein BOX15_Mlig017316g1	1.32495	Up
Except for cathepsin L, we can't get any useful information from the other 33 up-regulation transcripts.
